# Supplementary material for: Molecular basis of fatty acid taste in Drosophila
Source: eLife journal article supplement (doi:10.7554/elife.30115), 2017-12-12
Supplement: supp [file elife-30115-supp-v1.zip]

Archive with 22 entries (22 files):
- elife_poa_e30115_Figure_7_figure_supplement_1.tif
- elife_poa_e30115_Figure_7_figure_supplement_2_source_data.xlsx
- elife_poa_e30115_Figure_4_figure_supplement_1_source_data_1.xlsx
- elife_poa_e30115_Figure_5_figure_supplement_1_source_data_1.xlsx
- elife_poa_e30115_Figure_6_figure_supplement_1_source_data_1.xlsx
- elife_poa_e30115_Figure_1_source_data_1.xlsx
- elife_poa_e30115_Figure_1_figure_supplement_2.tif
- elife_poa_e30115_Figure_6_source_data_1.xlsx
- elife_poa_e30115_Figure_4_figure_supplement_1.tif
- elife_poa_e30115_Figure_7_figure_supplement_2.tif
- elife_poa_e30115_Figure_3_source_data_1.xlsx
- elife_poa_e30115_Figure1_figure_supplement_1_source_data_1.xlsx
- elife_poa_e30115_Figure_6_figure_supplement_1.tif
- elife_poa_e30115_Figure_5_figure_supplement_1.tif
- elife_poa_e30115_Figure_4_source_data_1.xlsx
- elife_poa_e30115_Figure_1_figure_supplement_2_source_data_1.xlsx
- elife_poa_e30115_Figure_5_source_data_1.xlsx
- elife_poa_e30115_Figure_1_figure_supplement_1.tif
- elife_poa_e30115_Figure_2_figure_supplement_1.tif
- elife_poa_e30115_Figure_7_figure_supplement_1_source_data_1.xlsx
- elife_poa_e30115_Transparent_Reporting_File.pdf
- elife_poa_e30115_Figure_7_source_data_1.xlsx
