# Supplementary material for: Molecular basis of fatty acid taste in Drosophila
Source: eLife journal article supplement (doi:10.7554/elife.30115), 2017-12-12
Supplement: supp [file elife-30115-supp-v1.zip › elife_poa_e30115_Figure1_figure_supplement_1_source_data_1.xlsx]

## Sheet: Sheet1
Figure 1-figure supplement 1-Source Data 1
PER responses of wild-type flies (w1118) to fatty acids between the leg and the labellum stimulations.
Taste organ stimulation	1% Hexanoic acid	1% Octanoic acid	1% Linoleic acid	100 mM Sucrose	8% Ethanol		Taste organ stimulation	1% Hexanoic acid	1% Octanoic acid	1% Linoleic acid	100 mM Sucrose	8% Ethanol
Leg	33.33	0	0	66.66	0		Labellum	33.33	0	0	33.33
Leg	33.33	66.66	33.33	0	0		Labellum	66.66	100	0	100
Leg	66.66	0	0	100	0		Labellum	100	33.33	0	100
Leg	0	33.33	0	0	0		Labellum	33.33	0	0	100
Leg	33.33	66.66	33.33	100	0		Labellum	0	0	0	66.66
Leg	100	33.33	66.66	0	33.33		Labellum	0	33.33	33.33	100
Leg	33.33	0	0	100	0		Labellum	0	0	0	33.33
Leg	66.66	66.66	66.66	100	0		Labellum	0	0	0	0
Leg	0	33.33	100	0	33.33		Labellum	66.66	0	0	100
Leg	66.66	100	100	100	33.33		Labellum	0	33.33	0	33.33
Leg	100	0	33.33	66.66	0		Labellum	33.33	33.33	0	100
Leg	66.66	66.66	0	100	33.33		Labellum	0	0	0	100
Leg	0	0	0	100	0		Labellum	100	100	0	100
Leg	0	0	0	33.33	0		Labellum	0	0	0	33.33
Leg	66.66	33.33	33.33	0	0		Labellum	0	0	0	0
Leg	33.33	100	66.66	0	0		Labellum	66.66	66.66	100	100
Leg	33.33	0	66.66	100	0		Labellum	66.66	33.33	33.33	66.66	0
Leg	66.66	33.33	0	100	0		Labellum	0	0	0	66.66	33.33
Leg	100	66.66	33.33	100	0		Labellum	100	33.33	0	66.66	0
Leg	66.66	66.66	33.33	100	0		Labellum	66.66	66.66	0	100	0
Leg	0	33.33	0	33.33	0		Labellum	100	100		100
Leg	66.66	66.66	100	100	0		Labellum	100	100		100
Leg	66.66	33.33	33.33	100	0		Labellum	0	0		0
Leg	100	0	0	100	0		Labellum	0	0		66.66
Leg	0	33.33	0	100	0		Labellum	0	33.33		33.33
Leg	66.66	100	0	0	0		Labellum	0	0		33.33
Leg	0	0	0	33.33	0		Labellum	0	0		66.66
Leg	66.66	33.33	100	33.33	33.33		Labellum	33.33	33.33		100
Leg	100	100	100	100	0		Labellum	0	0		0
Leg	100	100	100	100	66.66		Labellum	66.66	0		100
Leg	33.33	33.33	0	66.66	33.33		Labellum	33.33	0		100
Leg	100	0	33.33	66.66	33.33		Labellum	0	0		100
Leg	0	66.66	0	100	0		Labellum	100	66.66		100
Leg	33.33	33.33	66.66	33.33	33.33		Labellum	100	0		100
Leg	66.66	100	33.33	100	0		Labellum	33.33	0		33.33
Leg	33.33	33.33	0	100	0		Labellum	33.33	66.66		66.66
Leg	33.33	0	66.66	100	0		Labellum		0	33.33	100	0
Leg	0	0	66.66	66.66	0		Labellum		66.66	0	66.66	0
Leg	66.66	33.33	100	100	0		Labellum		0	0	100	0
Leg	0	0	0	0	0		Labellum		33.33	33.33	100	66.66
Leg	0	33.33	0	33.33	0		Labellum		0	100	100	0
Leg	100	100	100	100	33.33		Labellum		66.66	33.33	66.66	0
Leg				100			Labellum		100	100	100	66.66
Leg				100			Labellum		33.33	33.33	100	33.33
Leg				0			Labellum		66.66	0	100	0
Leg				100			Labellum		33.33	0	100	33.33
Leg				33.33			Labellum		0	0	100	33.33
Leg				0			Labellum		100	33.33	100	0
Leg				100			Labellum		66.66	0	100	33.33
Leg				66.66			Labellum		100	100	100	66.66
Leg				100			Labellum			0	66.66	0
Leg				0			Labellum			0	66.66	0
Leg				66.66			Labellum			0	33.33	0
Leg				66.66			Labellum			0	0	0
							Labellum			0	100	0
							Labellum			0	66.66	0
							Labellum			33.33	66.66	0
							Labellum			0	66.66	0
							Labellum	0	33.33		0
							Labellum	66.66	0		33.33
							Labellum	33.33	0		100
							Labellum	0	0		33.33
							Labellum	33.33	0		33.33
							Labellum	0	0		66.66
							Labellum	0	33.33		0
							Labellum	0	33.33		100
							Labellum	100	100		100
							Labellum	0	33.33		33.33
							Labellum	33.33	66.66		66.66
							Labellum	0	0		33.33
							Labellum	0	0		0
							Labellum	33.33	0		66.66
							Labellum	33.33	0		100
							Labellum			0	100	0
							Labellum			0	0	0
							Labellum			0	0	0
							Labellum			0	100	0
							Labellum			0	33.33	0
							Labellum			0	100	0
							Labellum			0	66.66	0
							Labellum			33.33	100	0
							Labellum			0	100	0
							Labellum			0	100	0
							Labellum			33.33	100	0
							Labellum			0	33.33	0
							Labellum			0	0	0
							Labellum			0	100	0
							Labellum	0	33.33		33.33
							Labellum	0	0		0
							Labellum	33.33	33.33		100
							Labellum	0	0		66.66
							Labellum	100	0		66.66
							Labellum	66.66	66.66		100
							Labellum	33.33	0		66.66
							Labellum	33.33	0		100
							Labellum	0	0		0
							Labellum	33.33	0		100
							Labellum	0	0		100
							Labellum	100	100		100
							Labellum	33.33	33.33		0
							Labellum	33.33	0		100
							Labellum	0	0		33.33
							Labellum			0	100	0
							Labellum			33.33	33.33	33.33
							Labellum			0	100	0
							Labellum			0	33.33	33.33
							Labellum			0	100	0
							Labellum			66.66	33.33	0
							Labellum			0	0	33.33
							Labellum			0	100	0
							Labellum	0	0		66.66
							Labellum	0	0		33.33
							Labellum	0	0		0
							Labellum	66.66	66.66		100
							Labellum	0	0		100
							Labellum	33.33	0		100
							Labellum	100	33.33		100
							Labellum	33.33	100		100
