# Supplementary material for: Molecular basis of fatty acid taste in Drosophila
Source: eLife journal article supplement (doi:10.7554/elife.30115), 2017-12-12
Supplement: supp [file elife-30115-supp-v1.zip › elife_poa_e30115_Figure_1_figure_supplement_2_source_data_1.xlsx]

## Sheet: (A) 5b sensilla
Figure 1-figure supplement 2-Source Data 1
Ca2+ responses of sweet GRNs associated with 5b (A), 5s (B) or 5v (C) sensilla of norpA mutant flies to fatty acids.
Sensilla	Sample Name	0.6% Hexanoic acid	0.2% Octanoic acid	0.2% Linoleic acid	10 mM Sucrose		Sensilla	Sample Name	0.6% Hexanoic acid	0.2% Octanoic acid	0.2% Linoleic acid	10 mM Sucrose		Sensilla	Sample Name	0.6% Hexanoic acid	0.2% Octanoic acid	0.2% Linoleic acid	10 mM Sucrose
5b	Control	57.69	5.91	0.95	64.14		5b	norpA-/-	-2.59			244.12		5b	Rescue	13.36			121.16
5b	Control	29.19	10.4	1.03	286.21		5b	norpA-/-	27.83			228.07		5b	Rescue	242.97	8.59		74.44
5b	Control	76.73	27.67	4.41	144.89		5b	norpA-/-	1.48			86.63		5b	Rescue	486.17	89.59		123.18
5b	Control	207.65	88.2	0.41	259.19		5b	norpA-/-	35.99	54.22		37.2		5b	Rescue	136.5	47.64		165.03
5b	Control	120.22		2.99	39.06		5b	norpA-/-	2.58	4.35		33.24		5b	Rescue	103.69	59.23		98.76
5b	Control	20.41	108.85	12	47.38		5b	norpA-/-	3.11	1.37		87.44		5b	Rescue	56.37	12.27		202.87
5b	Control	106.95	151.6	3.82	125.1		5b	norpA-/-	39.31	9.99		31.01		5b	Rescue	59.49			149.35
5b	Control	67.79	5.34	2.83	98.44		5b	norpA-/-		0.1		110.07		5b	Rescue	504.19			64.8
5b	Control	222.73	0.01		133.12		5b	norpA-/-	116.12	20.54		163.52		5b	Rescue	37.71	26.89	42.76	101.27
5b	Control	38.81	56.58	6.3	38.11		5b	norpA-/-	38.3	5.95		47.13		5b	Rescue	47.9	172.65	9.28	72.17
5b	Control	49.75	9.97	6.13	16.87		5b	norpA-/-	48.61	18.75		50.23		5b	Rescue	59.09		4.02	54.2
5b	Control	54.5	232.35	2.71	12.58		5b	norpA-/-	-1.14	4.98		51.94
5b	Control	17.82	37.92	17.16	34.03		5b	norpA-/-	1.87	-1.3		29.83
5b	Control	49.47	35.16	7.63	10.43		5b	norpA-/-	80.83	4.06		68.29
5b	Control	77.93	44.37		28.67		5b	norpA-/-			-0.22	360.35
5b	Control	193.6	61.38	11.46	21.49		5b	norpA-/-			29.48	32.63
5b	Control	80.7			49.43		5b	norpA-/-			-3	112.97
5b	Control	116.49	19.66		123.67		5b	norpA-/-	12.16		3.14	41.24
5b	Control		3.29		99.71		5b	norpA-/-	40.67		32.49	25.71
5b	Control	23.18	69.27		118.64		5b	norpA-/-	114.09		-0.22	532.11
5b	Control	45.97	90.79	2.53	136.18		5b	norpA-/-			10.95	325.6
5b	Control	105.38	54.78	20.95	16.9		5b	norpA-/-			2.34	24.61
5b	Control	142.94	197.72	15.24	46.27
5b	Control	29.59	106.4		82.54
5b	Control	8.8	123.98	12.5	11.85
5b	Control	83.21	102.39	49.46	20.61
5b	Control	24.48	16.86		581.35
5b	Control	508.12	8.1		41.29
5b	Control	56.06	17.05		57.98
5b	Control	18.61	8.37		37.2
5b	Control	18.9	44.44		48.92
5b	Control	7.54	7.88	1.53	79.68
5b	Control	82.57	251.58	9.11	167.5
5b	Control	128.84	97	14.54	54.74

## Sheet: (B) 5s sensilla
Figure 1-figure supplement 2-Source Data 1
Ca2+ responses of sweet GRNs associated with 5b (A), 5s (B) or 5v (C) sensilla of norpA mutant flies to fatty acids.
Sensilla	Sample Name	0.6% Hexanoic acid	0.2% Octanoic acid	0.2% Linoleic acid	10 mM Sucrose		Sensilla	Sample Name	0.6% Hexanoic acid	0.2% Octanoic acid	0.2% Linoleic acid	10 mM Sucrose		Sensilla	Sample Name	0.6% Hexanoic acid	0.2% Octanoic acid	0.2% Linoleic acid	10 mM Sucrose
5s	Control	40.07	16.04	10.02	66.55		5s	norpA-/-	5.83			349.52		5s	Rescue	37.63	1.77		116.82
5s	Control	31.7	15.23	6.71	266.9		5s	norpA-/-	14.29			203.3		5s	Rescue	202.11	7.5		92.59
5s	Control	58.13	9.8		161.7		5s	norpA-/-	47.91	48.21		65.82		5s	Rescue	15.05	45.84		214.03
5s	Control	65.23	13.8	1.53	77.61		5s	norpA-/-	6.99	-0.18		46.07		5s	Rescue	33.26	13.42		233.05
5s	Control	29.6		49.03	96.39		5s	norpA-/-	-1.63	8.32		178.61		5s	Rescue		22.57		222.63
5s	Control	15.18	6.06		82.91		5s	norpA-/-	47.19	59.25		59.07		5s	Rescue	41	6.08		203.12
5s	Control	21.37	126.78	0.33	17.78		5s	norpA-/-	93.91			90.74		5s	Rescue	33.09			185.49
5s	Control	27.93	96.66	17.89	58.8		5s	norpA-/-		7.72		145.66		5s	Rescue	97.95	22.85		538.72
5s	Control	88.94	74.14	9.22	212.05		5s	norpA-/-	1.15	7.78		56.43		5s	Rescue		11.47	13.46	183.11
5s	Control	142.42	3.44	2.01	208.08		5s	norpA-/-	2.55	2.59		51.08		5s	Rescue	31.15	125.3	0.58	131.35
5s	Control	100.44	0.13		297.48		5s	norpA-/-	62.7	2.29		91.45		5s	Rescue	153.97	12.83	5.47	95.83
5s	Control	14.39	7.07	6.51	98.67		5s	norpA-/-	16.13	0.78		53.57
5s	Control	79.66	17.97	12.72	29.81		5s	norpA-/-	51.99	18.72		72.25
5s	Control	58.06	112.71	2.99	14.11		5s	norpA-/-	1	8.57		33.83
5s	Control	15.96	72.37	1.39	138		5s	norpA-/-	3.33	2.06		58.35
5s	Control	36.85	22.13	17.07	33.91		5s	norpA-/-	-0.65	3.11		94.46
5s	Control	113.15	24.93	16.47	64.86		5s	norpA-/-	39.27	9.63		38.79
5s	Control	105.77	5.82		213.83		5s	norpA-/-	8.36	6.16		90.04
5s	Control	46.68	23.43		98.64		5s	norpA-/-			9.49	212.73
5s	Control		9.74		160.83		5s	norpA-/-			-1.44	39.47
5s	Control	152.96	29.39		128.91		5s	norpA-/-			-7.59	149.99
5s	Control	59.3	30.64	19.87	214.05		5s	norpA-/-	15.26		1.57	59.49
5s	Control	71.86	30.47	21.3	12.6		5s	norpA-/-	18.79		1.45	215.85
5s	Control	163.72	90.74	3.17	44.66		5s	norpA-/-	65.1		1.61	160.42
5s	Control	18.35	73.01		179.15		5s	norpA-/-	7.15		-1.6	532.06
5s	Control	36.88	86.29	22.82	12.34		5s	norpA-/-	6.56		5.3	169.42
5s	Control	26.15	21.4	26.19	35.71
5s	Control	8.78	8		810.42
5s	Control	180.23	33.69		102.01
5s	Control	45.27	1.33		236.51
5s	Control	105.7	83.74		72.26
5s	Control	47.26	137.25		15.75
5s	Control	38.28	99.74	-2.68	276.21
5s	Control	32.66	54.46	12.53	287.6
5s	Control	103.84	38.11	9	60.21

## Sheet: (C) 5v sensilla
Figure 1-figure supplement 2-Source Data 1
Ca2+ responses of sweet GRNs associated with 5b (A), 5s (B) or 5v (C) sensilla of norpA mutant flies to fatty acids.
Sensilla	Sample Name	0.6% Hexanoic acid	0.2% Octanoic acid	0.2% Linoleic acid	10 mM Sucrose		Sensilla	Sample Name	0.6% Hexanoic acid	0.2% Octanoic acid	0.2% Linoleic acid	10 mM Sucrose		Sensilla	Sample Name	0.6% Hexanoic acid	0.2% Octanoic acid	0.2% Linoleic acid	10 mM Sucrose
5v	Control		9.86		248.97		5v	norpA-/-	5.72			446.39		5v	Rescue	7.85	1.34		267.93
5v	Control	1.77	7.34		42.05		5v	norpA-/-	15.94			147.27		5v	Rescue	9.78	0.69		451.59
5v	Control		13.47		359.81		5v	norpA-/-	-0.77			66.23		5v	Rescue	-1.27	1.33		462.42
5v	Control		9.1	43.96	169.28		5v	norpA-/-	2.02	10.66		161.69		5v	Rescue	7.05	0.24		314.56
5v	Control			12.35	166.82		5v	norpA-/-	-5.34	-1.84		126.12		5v	Rescue	3.72	1.92		222.76
5v	Control		17.51	3.71	34.65		5v	norpA-/-	-6.08	-1.47		166.26		5v	Rescue	-2.06	5.22		343.8
5v	Control	6.91	10.36	4.16	228.96		5v	norpA-/-	-1.11	0.95		179.38		5v	Rescue	2.54			255.75
5v	Control	5.23	2.95		545.33		5v	norpA-/-	5.18			128.21		5v	Rescue	25.69	1.72		706.56
5v	Control		0.41	5.32	358.56		5v	norpA-/-		6.56		304.53		5v	Rescue	11.86	22.52	22.36	407.07
5v	Control	3.34	2.19	0.58	484.14		5v	norpA-/-	0.57	3.25		211.31		5v	Rescue	-0.35	56.63	16.08	347.45
5v	Control	2.21	2.72	33.11	86.05		5v	norpA-/-	6.9	2.04		53.98		5v	Rescue	0.65	11.44	2.37	168.21
5v	Control	1.11	18.66	13.2	45.27		5v	norpA-/-	1.3	8.36		79.36
5v	Control	1.15	3.26	13.17	45.74		5v	norpA-/-	18.05	5.44		103.59
5v	Control		5.04	6.06	99.16		5v	norpA-/-	56.97	23.77		199.64
5v	Control	2.54	0.1		98.02		5v	norpA-/-	18.74	-1.57		155.7
5v	Control	4.81	0.88	4.3	248.54		5v	norpA-/-	-0.5	0.02		164.26
5v	Control	3.53	6.22		300.88		5v	norpA-/-	5.46	14.73		115.53
5v	Control	2.98			383.79		5v	norpA-/-	11.93	6.17		318.84
5v	Control		1.75		300.86		5v	norpA-/-			4.87	410.31
5v	Control	97.9	5.94		228.71		5v	norpA-/-			0.91	129.95
5v	Control		17.94		530.9		5v	norpA-/-			-13.51	145.35
5v	Control		6.76	7.18	324.21		5v	norpA-/-	-1.73		0.33	97.82
5v	Control	60.58		14.61	18.96		5v	norpA-/-	11.04		0.01	254.56
5v	Control		7.92	19.8	155.95		5v	norpA-/-	-11.32		9.9	231.68
5v	Control	0.25	32.2		202.49		5v	norpA-/-	7.72		-6.57	399.69
5v	Control	3.39	0.12	14.15	29.55		5v	norpA-/-	-8.28		2.21	166.52
5v	Control	2.58	0.89	9.09	42.64
5v	Control	6.61	23.19		694.42
5v	Control	4.36	5.1		165.08
5v	Control	-2.84	19.91		376.17
5v	Control	3.89	2.41		116.73
5v	Control	9.4	2.69		41.23
5v	Control	11.13	4.55	-1.39	1075.46
5v	Control	16.37	7.56	4.12	503.34
5v	Control	-0.56	16.77	2.68	224.24
