# Supplementary material for: Molecular basis of fatty acid taste in Drosophila
Source: eLife journal article supplement (doi:10.7554/elife.30115), 2017-12-12
Supplement: supp [file elife-30115-supp-v1.zip › elife_poa_e30115_Figure_1_source_data_1.xlsx]

## Sheet: Figure 1(A)
Figure 1-Source Data 1.
(A) PER responses of sweet GRNs to fatty acids when inactivated by expression of UAS-TNT transgene.
Sample Name	1% Hexanoic acid	1% Octanoic acid	1% Linoleic acid	100 mM Sucrose	8% Ethanol (carrier)		Sample Name	1% Hexanoic acid	1% Octanoic acid	1% Linoleic acid	100 mM Sucrose	8% Ethanol (carrier)		Sample Name	1% Hexanoic acid	1% Octanoic acid	1% Linoleic acid	100 mM Sucrose	8% Ethanol (carrier)
Gr64f-GAL4 alone	33.33	0	100	66.66	0		UAS-TNT alone	100	100	33.33	100	0		Gr64-GAL4/UAS-TNT	0	0	0	0	0
Gr64f-GAL4 alone	0	0	0	66.66	0		UAS-TNT alone	100	33.33	0	100	0		Gr64-GAL4/UAS-TNT	0	0	66.66	33.33	0
Gr64f-GAL4 alone	66.66	0	0	100	0		UAS-TNT alone	0	0	0	33.33	0		Gr64-GAL4/UAS-TNT	0	0	0	0	0
Gr64f-GAL4 alone	100	0	0	66.66	0		UAS-TNT alone	66.66	0	33.33	66.66	0		Gr64-GAL4/UAS-TNT	0	0	0	0	0
Gr64f-GAL4 alone	0	0	0	33.33	0		UAS-TNT alone	0	0	0	33.33	0		Gr64-GAL4/UAS-TNT	0	0	0	66.66	0
Gr64f-GAL4 alone	33.33	0	0	66.66	0		UAS-TNT alone	0	33.33	0	33.33	0		Gr64-GAL4/UAS-TNT	0	0	0	0	0
Gr64f-GAL4 alone	66.66	33.33	0	66.66	33.33		UAS-TNT alone	100	0	0	100	66.66		Gr64-GAL4/UAS-TNT	0	0	0	0	0
Gr64f-GAL4 alone	100	66.66	33.33	100	33.33		UAS-TNT alone	100	33.33	33.33	66.66	0		Gr64-GAL4/UAS-TNT	0	0	0	0	0
Gr64f-GAL4 alone	33.33	66.66	100	66.66	33.33		UAS-TNT alone	33.33	100	100	100	33.33		Gr64-GAL4/UAS-TNT	0	0	0	0	0
Gr64f-GAL4 alone	0	0	33.33	100	0		UAS-TNT alone	100	0	0	100	0		Gr64-GAL4/UAS-TNT	100	66.66	66.66	0	33.33
Gr64f-GAL4 alone	100	66.66	33.33	100	33.33		UAS-TNT alone	0	0	0	100	0		Gr64-GAL4/UAS-TNT	0	0	0	0	33.33
Gr64f-GAL4 alone	0	66.66	100	33.33	0		UAS-TNT alone	0	0	0	0	0		Gr64-GAL4/UAS-TNT	0	0	0	0	0
Gr64f-GAL4 alone	66.66	0	33.33	100	0		UAS-TNT alone	33.33	66.66	0	33.33	0		Gr64-GAL4/UAS-TNT	0	0	0	0	0
Gr64f-GAL4 alone	66.66	0	33.33	0	0		UAS-TNT alone	0	0	0	33.33	0		Gr64-GAL4/UAS-TNT	0	0	0	0	0
Gr64f-GAL4 alone	0	0	0	0	0		UAS-TNT alone	0	33.33	0	0	0		Gr64-GAL4/UAS-TNT	0	0	0	0	0
Gr64f-GAL4 alone	0	0	0	0	0		UAS-TNT alone	33.33	0	100	33.33	0		Gr64-GAL4/UAS-TNT	0	0	0	0	0
Gr64f-GAL4 alone	33.33	0	33.33	33.33	0		UAS-TNT alone	0	0	0	33.33	33.33		Gr64-GAL4/UAS-TNT	0	0	0	33.33	0
Gr64f-GAL4 alone	66.66	66.66	100	33.33	0		UAS-TNT alone	0	66.66	0	0	0		Gr64-GAL4/UAS-TNT	33.33	0	0	33.33	33.33
Gr64f-GAL4 alone	0	0	0	0	0		UAS-TNT alone	0	66.66	0	33.33	0		Gr64-GAL4/UAS-TNT	0	0	0	0	33.33
Gr64f-GAL4 alone	100	100	66.66	100	33.33		UAS-TNT alone	0	33.33	0	33.33	0		Gr64-GAL4/UAS-TNT	66.66	0	33.33	0	0
Gr64f-GAL4 alone	66.66	0	0	100	0		UAS-TNT alone	66.66	66.66	0	100	0		Gr64-GAL4/UAS-TNT	0	33.33	66.66	66.66	0
Gr64f-GAL4 alone	0	0	0	33.33	0		UAS-TNT alone	0	0	0	66.66	0		Gr64-GAL4/UAS-TNT	0	0	0	66.66	0
Gr64f-GAL4 alone	0	0	0	0	0		UAS-TNT alone	33.33	0	0	66.66	0		Gr64-GAL4/UAS-TNT	0	0	0	0	0
Gr64f-GAL4 alone	0	0	33.33	0	0		UAS-TNT alone	0	33.33	0	0	0		Gr64-GAL4/UAS-TNT	0	0	0	0	0
Gr64f-GAL4 alone	33.33	0	0	100	0		UAS-TNT alone	0	66.66	0	33.33	0		Gr64-GAL4/UAS-TNT	0	0	0	0	0
Gr64f-GAL4 alone	0	0	0	0	0		UAS-TNT alone	0	0	0	100	66.66		Gr64-GAL4/UAS-TNT	0	0	0	0	0
Gr64f-GAL4 alone	66.66	66.66	33.33	33.33	0		UAS-TNT alone	66.66	0	0	66.66	0		Gr64-GAL4/UAS-TNT	0	66.66	66.66	100	0
Gr64f-GAL4 alone	100	100	0	100	0		UAS-TNT alone	33.33	66.66	0	33.33	0		Gr64-GAL4/UAS-TNT	33.33	0	0	66.66	0
Gr64f-GAL4 alone	0	33.33	0	33.33	0		UAS-TNT alone	0	33.33	0	0	0		Gr64-GAL4/UAS-TNT	66.66	33.33	100	33.33	0
Gr64f-GAL4 alone	0	33.33	66.66	33.33	0		UAS-TNT alone	33.33	0	66.66	33.33	0		Gr64-GAL4/UAS-TNT	0	0	33.33	0	0
Gr64f-GAL4 alone	100	100	100	100	66.66		UAS-TNT alone	0	0	33.33	33.33	0		Gr64-GAL4/UAS-TNT	0	0	0	0	0
Gr64f-GAL4 alone	0	0	0	0	0		UAS-TNT alone	0	0	0	66.66	0		Gr64-GAL4/UAS-TNT	0	0	0	0	0
Gr64f-GAL4 alone	33.33	0	100	66.66	0		UAS-TNT alone	33.33	33.33	100	100	0		Gr64-GAL4/UAS-TNT	0	0	0	0	0
Gr64f-GAL4 alone	100	100	0	100	0		UAS-TNT alone	33.33	0	0	66.66	0		Gr64-GAL4/UAS-TNT	0	0	0	0	0
Gr64f-GAL4 alone	0	0	0	0	0		UAS-TNT alone	0	0	0	66.66	0		Gr64-GAL4/UAS-TNT	66.66	0	66.66	100	0
Gr64f-GAL4 alone	0	0	33.33	100	0		UAS-TNT alone	0	0	0	0	0		Gr64-GAL4/UAS-TNT	0	0	0	0	0
Gr64f-GAL4 alone	33.33	0	0	66.66	0		UAS-TNT alone	33.33	66.66	100	0	0		Gr64-GAL4/UAS-TNT	0	0	0	0	0
Gr64f-GAL4 alone	66.66	66.66	100	33.33	0		UAS-TNT alone	33.33	66.66	0	0	0		Gr64-GAL4/UAS-TNT	0	33.33	0	33.33	0
Gr64f-GAL4 alone	66.66	100	100	100	100		UAS-TNT alone	0	33.33	33.33	0	0		Gr64-GAL4/UAS-TNT	0	0	0	66.66	0
Gr64f-GAL4 alone	33.33	0	0	0	0		UAS-TNT alone	0	0	0	66.66	0		Gr64-GAL4/UAS-TNT	0	0	0	100	0
Gr64f-GAL4 alone	0	0	0	0	0		UAS-TNT alone	0	0	0	0	0		Gr64-GAL4/UAS-TNT	0	0	0	0	0
Gr64f-GAL4 alone	33.33	33.33	66.66	33.33	0		UAS-TNT alone	100	100	0	100	0		Gr64-GAL4/UAS-TNT	0	0	0	0	0
Gr64f-GAL4 alone	0	0	0	33.33	0		UAS-TNT alone	0	33.33	100	100	0		Gr64-GAL4/UAS-TNT	66.66	0	0	33.33	0
Gr64f-GAL4 alone	66.66	100	100	33.33	0		UAS-TNT alone	0	0	0	100	0		Gr64-GAL4/UAS-TNT	0	0	0	0	0
Gr64f-GAL4 alone	33.33	0	0	66.66	0		UAS-TNT alone	0	0	0	33.33	0		Gr64-GAL4/UAS-TNT	0	0	0	0	0
Gr64f-GAL4 alone	66.66	100	66.66	100	0		UAS-TNT alone	100	100	100	66.66	0		Gr64-GAL4/UAS-TNT	0	0	33.33	0	0
Gr64f-GAL4 alone	33.33	33.33	66.66	0	0		UAS-TNT alone	33.33	66.66	0	100	33.33		Gr64-GAL4/UAS-TNT	0	66.66	0	0	0
Gr64f-GAL4 alone	0	0	0	100	33.33		UAS-TNT alone	0	0	0	0	0		Gr64-GAL4/UAS-TNT	0	0	0	33.33	0
Gr64f-GAL4 alone	0	66.66	0	100	0		UAS-TNT alone	0	33.33	33.33	33.33	0		Gr64-GAL4/UAS-TNT	0	0	0	0	0
Gr64f-GAL4 alone	0	100	33.33	33.33	0		UAS-TNT alone	0	33.33	66.66	100	0		Gr64-GAL4/UAS-TNT	0	0	0	33.33	0
Gr64f-GAL4 alone	0	0	0	33.33	0		UAS-TNT alone	0	0	0	33.33	0		Gr64-GAL4/UAS-TNT	0	0	0	0	0
Gr64f-GAL4 alone	33.33	33.33	0	0	0		UAS-TNT alone	33.33	33.33	0	100	0		Gr64-GAL4/UAS-TNT	0	0	0	0	0
Gr64f-GAL4 alone	0	0	0	0	0		UAS-TNT alone	33.33	0	0	100	0		Gr64-GAL4/UAS-TNT	0	0	0	0	0
Gr64f-GAL4 alone	0	0	33.33	33.33	0		UAS-TNT alone	0	0	0	66.66	0		Gr64-GAL4/UAS-TNT	0	0	0	0	0
Gr64f-GAL4 alone	0	0	66.66	100	0		UAS-TNT alone	0	0	0	66.66	0		Gr64-GAL4/UAS-TNT	0	0	0	0	0
Gr64f-GAL4 alone	33.33	66.66	0	33.33	0		UAS-TNT alone	0	0	33.33	33.33	0		Gr64-GAL4/UAS-TNT	0	0	0	0	0
Gr64f-GAL4 alone	33.33	66.66	66.66	33.33	0		UAS-TNT alone	33.33	0	66.66	100	0		Gr64-GAL4/UAS-TNT	0	0	0	0	0
Gr64f-GAL4 alone	100	100	100	100	66.66		UAS-TNT alone	33.33	33.33	0	33.33	0		Gr64-GAL4/UAS-TNT	33.33	0	0	100	33.33
Gr64f-GAL4 alone	0	0	33.33	66.66	0		UAS-TNT alone	0	0	0	66.66	0		Gr64-GAL4/UAS-TNT	0	0	0	33.33	0
Gr64f-GAL4 alone	0	0	0	33.33	33.33		UAS-TNT alone	0	0	33.33	33.33	0		Gr64-GAL4/UAS-TNT	0	0	0	0	0
Gr64f-GAL4 alone	33.33	33.33	0	100	33.33		UAS-TNT alone	33.33	0	0	66.66	0		Gr64-GAL4/UAS-TNT	0	0	0	0
Gr64f-GAL4 alone	0	0	0	100	33.33		UAS-TNT alone	0	0	100	33.33	0		Gr64-GAL4/UAS-TNT	0	0	0	0
Gr64f-GAL4 alone	0	0	0	0	0		UAS-TNT alone	66.66	66.66	66.66	66.66	0		Gr64-GAL4/UAS-TNT	0	0	0	66.66
Gr64f-GAL4 alone	0	0	0	33.33	0		UAS-TNT alone	0	33.33	33.33	66.66	0		Gr64-GAL4/UAS-TNT	0	0	0	0
Gr64f-GAL4 alone	0	0	0	0	0		UAS-TNT alone	0	0	0	33.33	0		Gr64-GAL4/UAS-TNT	0	0	0	0
Gr64f-GAL4 alone	33.33	66.66	0	0	0		UAS-TNT alone	0	33.33	33.33	66.66	0		Gr64-GAL4/UAS-TNT	0	0	0	0
Gr64f-GAL4 alone	100	100	100	100	66.66		UAS-TNT alone	33.33	33.33	33.33	66.66	0		Gr64-GAL4/UAS-TNT	0	0	0	0
Gr64f-GAL4 alone	33.33	100	66.66	100	0		UAS-TNT alone	0	0	0	33.33	0		Gr64-GAL4/UAS-TNT	0	0	66.66	66.66
Gr64f-GAL4 alone	0	0	0	66.66	0		UAS-TNT alone	66.66	100	100	0	0		Gr64-GAL4/UAS-TNT	0	0	0	66.66
Gr64f-GAL4 alone	0	100	100	100	0		UAS-TNT alone	0	0	33.33	100	0		Gr64-GAL4/UAS-TNT	0	0	0	0

## Sheet: Figure 1(B)
Figure 1-Source Data 1.
(B) PER responses of octuple mutant flies lacking all sugar Gr genes (Gr5aLexADGr61aDGr64a-f) to fatty acids
Sample Name	1% Hexanoic acid	1% Octanoic acid	1% Linoleic acid	100 mM Sucrose	8% Ethanol (carrier)		Sample Name	1% Hexanoic acid	1% Octanoic acid	1% Linoleic acid	100 mM Sucrose	8% Ethanol (carrier)
w1118	33.33	0	0	66.66	0		Gr5aLexADGr61aDGr64a-f	100	33.33	0	33.33	66.66
w1118	33.33	66.66	33.33	0	0		Gr5aLexADGr61aDGr64a-f	66.66	0	66.66	66.66	0
w1118	66.66	0	0	100	0		Gr5aLexADGr61aDGr64a-f	100	100	100	0	0
w1118	0	33.33	0	0	0		Gr5aLexADGr61aDGr64a-f	0	0	0	33.33	0
w1118	33.33	66.66	33.33	100	0		Gr5aLexADGr61aDGr64a-f	100	0	0	0	0
w1118	100	33.33	66.66	0	33.33		Gr5aLexADGr61aDGr64a-f	100	100	100	33.33	0
w1118	33.33	0	0	100	0		Gr5aLexADGr61aDGr64a-f	66.66	33.33	100	0	33.33
w1118	66.66	66.66	66.66	100	0		Gr5aLexADGr61aDGr64a-f	100	66.66	0	33.33	0
w1118	0	33.33	100	0	33.33		Gr5aLexADGr61aDGr64a-f	100	66.66	100	0	33.33
w1118	66.66	100	100	100	33.33		Gr5aLexADGr61aDGr64a-f	33.33	33.33	33.33	66.66	66.66
w1118	100	0	33.33	66.66	0		Gr5aLexADGr61aDGr64a-f	66.66	100	100	33.33	0
w1118	66.66	66.66	0	100	33.33		Gr5aLexADGr61aDGr64a-f	100	100	33.33	0	33.33
w1118	0	0	0	100	0		Gr5aLexADGr61aDGr64a-f	100	100	66.66	0	0
w1118	0	0	0	33.33	0		Gr5aLexADGr61aDGr64a-f	33.33	66.66	0	33.33	0
w1118	66.66	33.33	33.33	0	0		Gr5aLexADGr61aDGr64a-f	33.33	33.33	33.33	33.33	0
w1118	33.33	100	66.66	0	0		Gr5aLexADGr61aDGr64a-f	33.33	33.33	0	33.33	0
w1118	33.33	0	66.66	100	0		Gr5aLexADGr61aDGr64a-f	100	66.66	100	100	66.66
w1118	66.66	33.33	0	100	0		Gr5aLexADGr61aDGr64a-f	100	100	100	0	0
w1118	100	66.66	33.33	100	0		Gr5aLexADGr61aDGr64a-f	100	100	66.66	100	0
w1118	66.66	66.66	33.33	100	0		Gr5aLexADGr61aDGr64a-f	100	66.66	100	33.33	0
w1118	0	33.33	0	33.33	0		Gr5aLexADGr61aDGr64a-f	33.33	0	0	0	0
w1118	66.66	66.66	100	100	0		Gr5aLexADGr61aDGr64a-f	66.66	100	0	66.66	0
w1118	66.66	33.33	33.33	100	0		Gr5aLexADGr61aDGr64a-f	100	100	33.33	0	0
w1118	100	0	0	100	0		Gr5aLexADGr61aDGr64a-f	100	100	66.66	66.66	33.33
w1118	0	33.33	0	100	0		Gr5aLexADGr61aDGr64a-f	0	0	0	33.33	0
w1118	66.66	100	0	0	0		Gr5aLexADGr61aDGr64a-f	100	100	66.66	0	0
w1118	0	0	0	33.33	0		Gr5aLexADGr61aDGr64a-f	33.33	33.33	33.33	0	0
w1118	66.66	33.33	100	33.33	33.33		Gr5aLexADGr61aDGr64a-f	100	66.66	100	0	0
w1118	100	100	100	100	0		Gr5aLexADGr61aDGr64a-f	100	100	100	0	33.33
w1118	100	100	100	100	66.66		Gr5aLexADGr61aDGr64a-f	100	100	0	100	0
w1118	33.33	33.33	0	66.66	33.33		Gr5aLexADGr61aDGr64a-f	100	66.66	100	0	0
w1118	100	0	33.33	66.66	33.33		Gr5aLexADGr61aDGr64a-f	66.66	100	100	0	0
w1118	0	66.66	0	100	0		Gr5aLexADGr61aDGr64a-f	66.66	100	66.66	33.33	0
w1118	33.33	33.33	66.66	33.33	33.33		Gr5aLexADGr61aDGr64a-f	100	100	33.33	33.33	0
w1118	66.66	100	33.33	100	0		Gr5aLexADGr61aDGr64a-f	0	0	0	33.33	0
w1118	33.33	33.33	0	100	0		Gr5aLexADGr61aDGr64a-f	66.66	0	33.33	66.66	33.33
w1118	33.33	0	66.66	100	0		Gr5aLexADGr61aDGr64a-f	100	100	100	100	100
w1118	0	0	66.66	66.66	0		Gr5aLexADGr61aDGr64a-f	100	100	33.33	0	66.66
w1118	66.66	33.33	100	100	0		Gr5aLexADGr61aDGr64a-f	0	0	0	0	33.33
w1118	0	0	0	0	0		Gr5aLexADGr61aDGr64a-f	100	66.66	66.66	0	0
w1118	0	33.33	0	33.33	0		Gr5aLexADGr61aDGr64a-f	33.33	100	66.66	33.33	33.33
w1118	100	100	100	100	33.33		Gr5aLexADGr61aDGr64a-f	100	100	100	33.33	0
w1118				100			Gr5aLexADGr61aDGr64a-f	100	100	100	0	0
w1118				100			Gr5aLexADGr61aDGr64a-f	100	33.33	66.66	33.33	0
w1118				0			Gr5aLexADGr61aDGr64a-f	100	100	100	100	33.33
w1118				100			Gr5aLexADGr61aDGr64a-f	66.66	66.66	66.66	0	33.33
w1118				33.33			Gr5aLexADGr61aDGr64a-f	66.66	66.66	0	0	0
w1118				0			Gr5aLexADGr61aDGr64a-f	100	66.66	0	0	33.33
w1118				100			Gr5aLexADGr61aDGr64a-f	100	100	66.66	33.33	0
w1118				66.66			Gr5aLexADGr61aDGr64a-f	100	66.66	100	0	0
w1118				100			Gr5aLexADGr61aDGr64a-f	100	100	100	33.33	33.33
w1118				0			Gr5aLexADGr61aDGr64a-f	100	100	33.33	0	33.33
w1118				66.66			Gr5aLexADGr61aDGr64a-f	33.33	33.33	33.33	33.33	0
w1118				66.66			Gr5aLexADGr61aDGr64a-f	66.66	66.66	33.33	0	0
							Gr5aLexADGr61aDGr64a-f	66.66	100	0	33.33	0
							Gr5aLexADGr61aDGr64a-f	100	100	100	0	33.33
							Gr5aLexADGr61aDGr64a-f	100	100	0	0	0
							Gr5aLexADGr61aDGr64a-f	66.66	100	33.33	0	0
							Gr5aLexADGr61aDGr64a-f				0
							Gr5aLexADGr61aDGr64a-f				0
							Gr5aLexADGr61aDGr64a-f				0
							Gr5aLexADGr61aDGr64a-f				0
							Gr5aLexADGr61aDGr64a-f				0
							Gr5aLexADGr61aDGr64a-f				0
							Gr5aLexADGr61aDGr64a-f				0
							Gr5aLexADGr61aDGr64a-f				66.66
							Gr5aLexADGr61aDGr64a-f				0
							Gr5aLexADGr61aDGr64a-f				0
							Gr5aLexADGr61aDGr64a-f				33.33
							Gr5aLexADGr61aDGr64a-f				0
							Gr5aLexADGr61aDGr64a-f				100
							Gr5aLexADGr61aDGr64a-f				0
							Gr5aLexADGr61aDGr64a-f				0
							Gr5aLexADGr61aDGr64a-f				33.33
							Gr5aLexADGr61aDGr64a-f				0
							Gr5aLexADGr61aDGr64a-f				0
							Gr5aLexADGr61aDGr64a-f				0
							Gr5aLexADGr61aDGr64a-f				0
							Gr5aLexADGr61aDGr64a-f				0
							Gr5aLexADGr61aDGr64a-f				0
							Gr5aLexADGr61aDGr64a-f				0
							Gr5aLexADGr61aDGr64a-f				0
							Gr5aLexADGr61aDGr64a-f				0
