# Supplementary material for: Molecular basis of fatty acid taste in Drosophila
Source: eLife journal article supplement (doi:10.7554/elife.30115), 2017-12-12
Supplement: supp [file elife-30115-supp-v1.zip › elife_poa_e30115_Figure_3_source_data_1.xlsx]

## Sheet: Figure 3(A)
Figure 3-Source Data 1.
(A) PER responses of IR25a mutant flies to fatty acids.
Genotype	1% Hexanoic acid	1% Octanoic acid	1% Linoleic acid	100 mM Sucrose		Genotype	1% Hexanoic acid	1% Octanoic acid	1% Linoleic acid	100 mM Sucrose		Genotype	1% Hexanoic acid	1% Octanoic acid	1% Linoleic acid	100 mM Sucrose		Genotype	1% Hexanoic acid	1% Octanoic acid	1% Linoleic acid	100 mM Sucrose		Genotype	1% Hexanoic acid	1% Octanoic acid	1% Linoleic acid	100 mM Sucrose
w1118	33.33	100	66.66	66.66		IR25a1/IR25a1	0	0	100	100		IR25a1 IR25a-GAL4/IR25a1	0	0	0	0		IR25a1 UAS-IR25a/IR25a1	0	0	0	0		IR25a1 IR25a-GAL4/IR25a1 UAS-IR25a	0	33.33	66.66	33.33
w1118	33.33	100	100	66.66		IR25a1/IR25a1	0	33.33	66.66	100		IR25a1 IR25a-GAL4/IR25a1	0	0	0	0		IR25a1 UAS-IR25a/IR25a1	0	33.33	0	33.33		IR25a1 IR25a-GAL4/IR25a1 UAS-IR25a	66.66	66.66	33.33	100
w1118	33.33	0	0	100		IR25a1/IR25a1	66.66	66.66	0	33.33		IR25a1 IR25a-GAL4/IR25a1	0	0	0	0		IR25a1 UAS-IR25a/IR25a1	0	0	0	33.33		IR25a1 IR25a-GAL4/IR25a1 UAS-IR25a	0	0	0	0
w1118	33.33	0	33.33	100		IR25a1/IR25a1	0	0	0	33.33		IR25a1 IR25a-GAL4/IR25a1	0	0	0	33.33		IR25a1 UAS-IR25a/IR25a1	0	0	33.33	33.33		IR25a1 IR25a-GAL4/IR25a1 UAS-IR25a	66.66	0	0	33.33
w1118	0	0	0	66.66		IR25a1/IR25a1	0	0	0	100		IR25a1 IR25a-GAL4/IR25a1	0	0	0	66.66		IR25a1 UAS-IR25a/IR25a1	0	0	0	33.33		IR25a1 IR25a-GAL4/IR25a1 UAS-IR25a	66.66	0	0	0
w1118	0	33.33	33.33	0		IR25a1/IR25a1	0	0	0	66.66		IR25a1 IR25a-GAL4/IR25a1	0	0	0	66.66		IR25a1 UAS-IR25a/IR25a1	0	0	0	0		IR25a1 IR25a-GAL4/IR25a1 UAS-IR25a	0	0	0	0
w1118	100	100	100	100		IR25a1/IR25a1	0	0	0	0		IR25a1 IR25a-GAL4/IR25a1	0	0	0	33.33		IR25a1 UAS-IR25a/IR25a1	0	0	0	100		IR25a1 IR25a-GAL4/IR25a1 UAS-IR25a	100	100	33.33	100
w1118	100	100	100	100		IR25a1/IR25a1	0	0	0	100		IR25a1 IR25a-GAL4/IR25a1	0	0	0	66.66		IR25a1 UAS-IR25a/IR25a1	0	0	0	0		IR25a1 IR25a-GAL4/IR25a1 UAS-IR25a	0	33.33	0	33.33
w1118	66.66	100	100	100		IR25a1/IR25a1	0	0	0	66.66		IR25a1 IR25a-GAL4/IR25a1	0	0	0	33.33		IR25a1 UAS-IR25a/IR25a1	0	0	0	33.33		IR25a1 IR25a-GAL4/IR25a1 UAS-IR25a	100	33.33	0	100
w1118	100	66.66	66.66	100		IR25a1/IR25a1	0	0	33.33	100		IR25a1 IR25a-GAL4/IR25a1	0	0	0	66.66		IR25a1 UAS-IR25a/IR25a1	0	0	0	66.66		IR25a1 IR25a-GAL4/IR25a1 UAS-IR25a	66.66	100	0	100
w1118	66.66	100	33.33	66.66		IR25a1/IR25a1	0	0	0	33.33		IR25a1 IR25a-GAL4/IR25a1	0	0	0	0		IR25a1 UAS-IR25a/IR25a1	33.33	0	0	66.66		IR25a1 IR25a-GAL4/IR25a1 UAS-IR25a	33.33	66.66	66.66	100
w1118	33.33	66.66	33.33	100		IR25a1/IR25a1	0	0	0	100		IR25a1 IR25a-GAL4/IR25a1	0	0	0	0		IR25a1 UAS-IR25a/IR25a1	0	0	0	66.66		IR25a1 IR25a-GAL4/IR25a1 UAS-IR25a	0	66.66	66.66	100
w1118	66.66	100	33.33	100		IR25a1/IR25a1	33.33	0	0	100		IR25a1 IR25a-GAL4/IR25a1	0	0	0	0		IR25a1 UAS-IR25a/IR25a1	0	0	0	66.66		IR25a1 IR25a-GAL4/IR25a1 UAS-IR25a	66.66	0	0	0
w1118	66.66	100	66.66	100		IR25a1/IR25a1	0	0	0	66.66		IR25a1 IR25a-GAL4/IR25a1	0	0	0	66.66		IR25a1 UAS-IR25a/IR25a1	0	0	0	0		IR25a1 IR25a-GAL4/IR25a1 UAS-IR25a	0	66.66	66.66	66.66
w1118	0	33.33	0	0		IR25a1/IR25a1	0	0	0	100		IR25a1 IR25a-GAL4/IR25a1	0	0	0	0		IR25a1 UAS-IR25a/IR25a1	0	33.33	0	100		IR25a1 IR25a-GAL4/IR25a1 UAS-IR25a	0	0	0	0
w1118	0	66.66	0	66.66		IR25a1/IR25a1	0	0	0	66.66		IR25a1 IR25a-GAL4/IR25a1	0	0	0	33.33		IR25a1 UAS-IR25a/IR25a1	0	0	0	66.66		IR25a1 IR25a-GAL4/IR25a1 UAS-IR25a	100	0	0	33.33
w1118	33.33	33.33	0	33.33		IR25a1/IR25a1	0	0	0	0		IR25a1 IR25a-GAL4/IR25a1	0	0	0	33.33		IR25a1 UAS-IR25a/IR25a1	0	33.33	0	100		IR25a1 IR25a-GAL4/IR25a1 UAS-IR25a	33.33	33.33	33.33	0
w1118	100	0	33.33	100		IR25a1/IR25a1	33.33	0	33.33	66.66		IR25a1 IR25a-GAL4/IR25a1	0	0	0	33.33		IR25a1 UAS-IR25a/IR25a1	0	0	0	0		IR25a1 IR25a-GAL4/IR25a1 UAS-IR25a	100	100	100	100
w1118	0	66.66	66.66	33.33		IR25a1/IR25a1	0	0	0	66.66		IR25a1 IR25a-GAL4/IR25a1	0	0	0	0		IR25a1 UAS-IR25a/IR25a1	0	0	33.33	0		IR25a1 IR25a-GAL4/IR25a1 UAS-IR25a	100	100	33.33	33.33
w1118	66.66	66.66	66.66	100		IR25a1/IR25a1	0	0	0	100		IR25a1 IR25a-GAL4/IR25a1	0	0	0	0		IR25a1 UAS-IR25a/IR25a1	0	0	33.33	66.66		IR25a1 IR25a-GAL4/IR25a1 UAS-IR25a	100	0	0	66.66
w1118	100	66.66	33.33	100		IR25a1/IR25a1	0	0	0	100		IR25a1 IR25a-GAL4/IR25a1	0	0	33.33	0		IR25a1 UAS-IR25a/IR25a1	33.33	0	0	0		IR25a1 IR25a-GAL4/IR25a1 UAS-IR25a	66.66	100	66.66	100
w1118	100	100	66.66	100		IR25a1/IR25a1	0	33.33	33.33	0		IR25a1 IR25a-GAL4/IR25a1	33.33	0	0	100		IR25a1 UAS-IR25a/IR25a1	0	0	0	33.33		IR25a1 IR25a-GAL4/IR25a1 UAS-IR25a	100	100	0	100
w1118	0	0	0	33.33		IR25a1/IR25a1	0	0	0	100		IR25a1 IR25a-GAL4/IR25a1	0	0	0	0		IR25a1 UAS-IR25a/IR25a1	0	0	0	66.66		IR25a1 IR25a-GAL4/IR25a1 UAS-IR25a	33.33	33.33	0	66.66
w1118	100	100	0	100		IR25a1/IR25a1	0	33.33	100	100		IR25a1 IR25a-GAL4/IR25a1	0	0	0	33.33		IR25a1 UAS-IR25a/IR25a1	0	0	0	0		IR25a1 IR25a-GAL4/IR25a1 UAS-IR25a	100	100	66.66	100
w1118	66.66	100	0	33.33		IR25a1/IR25a1	33.33	0	0	100		IR25a1 IR25a-GAL4/IR25a1	0	0	0	33.33		IR25a1 UAS-IR25a/IR25a1	0	0	66.66	100		IR25a1 IR25a-GAL4/IR25a1 UAS-IR25a	33.33	0	0	66.66
w1118	100	33.33	0	66.66		IR25a1/IR25a1	0	0	0	100		IR25a1 IR25a-GAL4/IR25a1	0	33.33	0	0		IR25a1 UAS-IR25a/IR25a1	0	0	0	33.33		IR25a1 IR25a-GAL4/IR25a1 UAS-IR25a	33.33	100	33.33	66.66
w1118	0	66.66	33.33	66.66		IR25a1/IR25a1	0	0	0	100		IR25a1 IR25a-GAL4/IR25a1	0	33.33	0	0		IR25a1 UAS-IR25a/IR25a1	0	33.33	0	33.33		IR25a1 IR25a-GAL4/IR25a1 UAS-IR25a	33.33	33.33	66.66	33.33
w1118	100	100	100	66.66		IR25a1/IR25a1	0	33.33	0	100		IR25a1 IR25a-GAL4/IR25a1	66.66	33.33	33.33	100		IR25a1 UAS-IR25a/IR25a1	0	0	0	0		IR25a1 IR25a-GAL4/IR25a1 UAS-IR25a	33.33	33.33	0	0
w1118	66.66	33.33	0	33.33		IR25a1/IR25a1	0	66.66	0	100		IR25a1 IR25a-GAL4/IR25a1	0	0	0	66.66		IR25a1 UAS-IR25a/IR25a1	33.33	0	0	0		IR25a1 IR25a-GAL4/IR25a1 UAS-IR25a	33.33	100	33.33	100
w1118	0	0	33.33	0		IR25a1/IR25a1	0	0	0	33.33		IR25a1 IR25a-GAL4/IR25a1	0	0	33.33	100		IR25a1 UAS-IR25a/IR25a1	0	0	0	66.66		IR25a1 IR25a-GAL4/IR25a1 UAS-IR25a	66.66	100	66.66	33.33
w1118	0	0	0	33.33		IR25a1/IR25a1	0	0	0	33.33		IR25a1 IR25a-GAL4/IR25a1	0	0	0	0		IR25a1 UAS-IR25a/IR25a1	100	33.33	0	100		IR25a1 IR25a-GAL4/IR25a1 UAS-IR25a	66.66	33.33	0	100
w1118	0	0	33.33	0		IR25a1/IR25a1	0	0	33.33	100		IR25a1 IR25a-GAL4/IR25a1	0	0	0	0		IR25a1 UAS-IR25a/IR25a1	0	0	0	0		IR25a1 IR25a-GAL4/IR25a1 UAS-IR25a	100	66.66	0	100
w1118	66.66	66.66	100	100		IR25a1/IR25a1	0	0	66.66	100		IR25a1 IR25a-GAL4/IR25a1	0	0	0	33.33		IR25a1 UAS-IR25a/IR25a1	0	0	0	0		IR25a1 IR25a-GAL4/IR25a1 UAS-IR25a	33.33	66.66	66.66	66.66
w1118	0	0	0	100		IR25a1/IR25a1	0	0	0	100		IR25a1 IR25a-GAL4/IR25a1	0	33.33	0	0		IR25a1 UAS-IR25a/IR25a1	0	0	0	66.66		IR25a1 IR25a-GAL4/IR25a1 UAS-IR25a	66.66	66.66	100	100
w1118	66.66	66.66	33.33	66.66		IR25a1/IR25a1	0	0	66.66	100		IR25a1 IR25a-GAL4/IR25a1	0	0	0	33.33		IR25a1 UAS-IR25a/IR25a1	0	0	33.33	33.33		IR25a1 IR25a-GAL4/IR25a1 UAS-IR25a	66.66	66.66	33.33	0
w1118	66.66	66.66	66.66	66.66		IR25a1/IR25a1	33.33	0	0	100		IR25a1 IR25a-GAL4/IR25a1	33.33	0	0	100		IR25a1 UAS-IR25a/IR25a1	0	0	0	100		IR25a1 IR25a-GAL4/IR25a1 UAS-IR25a	33.33	33.33	0	100
w1118	66.66	100	66.66	100		IR25a1/IR25a1	33.33	0	0	100		IR25a1 IR25a-GAL4/IR25a1	0	0	0	0		IR25a1 UAS-IR25a/IR25a1	33.33	33.33	33.33	100		IR25a1 IR25a-GAL4/IR25a1 UAS-IR25a	0	0	0	0
w1118	0	100	66.66	100		IR25a1/IR25a1	0	0	0	100		IR25a1 IR25a-GAL4/IR25a1	0	0	0	66.66		IR25a1 UAS-IR25a/IR25a1	0	0	0	66.66		IR25a1 IR25a-GAL4/IR25a1 UAS-IR25a	0	0	0	66.66
w1118	66.66	100	33.33	0		IR25a1/IR25a1	0	33.33	0	100		IR25a1 IR25a-GAL4/IR25a1	0	0	0	100		IR25a1 UAS-IR25a/IR25a1	0	33.33	0	66.66		IR25a1 IR25a-GAL4/IR25a1 UAS-IR25a	100	100	0	100
w1118	0	0	0	66.66		IR25a1/IR25a1	66.66	33.33	0	100		IR25a1 IR25a-GAL4/IR25a1	33.33	66.66	0	100		IR25a1 UAS-IR25a/IR25a1	0	0	0	100		IR25a1 IR25a-GAL4/IR25a1 UAS-IR25a	100	100	0	66.66
w1118	33.33	33.33	0	66.66		IR25a1/IR25a1	0	33.33	66.66	100		IR25a1 IR25a-GAL4/IR25a1	0	0	0	100		IR25a1 UAS-IR25a/IR25a1	0	0	0	100		IR25a1 IR25a-GAL4/IR25a1 UAS-IR25a	33.33	100	66.66	66.66
w1118	100	100	100	100		IR25a1/IR25a1	0	66.66	33.33	100		IR25a1 IR25a-GAL4/IR25a1	33.33	66.66	66.66	33.33		IR25a1 UAS-IR25a/IR25a1	0	0	0	0		IR25a1 IR25a-GAL4/IR25a1 UAS-IR25a	33.33	100	100	100
w1118	66.66	33.33	33.33	100		IR25a1/IR25a1	0	0	0	66.66		IR25a1 IR25a-GAL4/IR25a1	66.66	0	0	100		IR25a1 UAS-IR25a/IR25a1	0	0	0	0		IR25a1 IR25a-GAL4/IR25a1 UAS-IR25a	0	33.33	66.66	66.66
w1118	66.66	100	100	100		IR25a1/IR25a1	33.33	33.33	100	100		IR25a1 IR25a-GAL4/IR25a1	0	0	0	66.66		IR25a1 UAS-IR25a/IR25a1	0	0	0	100		IR25a1 IR25a-GAL4/IR25a1 UAS-IR25a	0	0	33.33	33.33
w1118	100	100	100	100		IR25a1/IR25a1	0	0	0	66.66		IR25a1 IR25a-GAL4/IR25a1	0	0	0	100		IR25a1 UAS-IR25a/IR25a1	0	0	0	100		IR25a1 IR25a-GAL4/IR25a1 UAS-IR25a	33.33	66.66	0	66.66
w1118	100	33.33	33.33	33.33		IR25a1/IR25a1	0	0	0	33.33		IR25a1 IR25a-GAL4/IR25a1	0	0	0	66.66		IR25a1 UAS-IR25a/IR25a1	0	0	33.33	100		IR25a1 IR25a-GAL4/IR25a1 UAS-IR25a	66.66	0	0	66.66
w1118	100	33.33	66.66	33.33		IR25a1/IR25a1	0	0	0	66.66		IR25a1 IR25a-GAL4/IR25a1	0	0	0	66.66		IR25a1 UAS-IR25a/IR25a1	0	0	0	100		IR25a1 IR25a-GAL4/IR25a1 UAS-IR25a	100	33.33	0	100
w1118	33.33	0	100	0		IR25a1/IR25a1	0	0	0	100		IR25a1 IR25a-GAL4/IR25a1	0	0	0	100		IR25a1 UAS-IR25a/IR25a1	0	0	0	66.66		IR25a1 IR25a-GAL4/IR25a1 UAS-IR25a	100	33.33	0	66.66
w1118	0	66.66	33.33	100		IR25a1/IR25a1	0	0	0	100		IR25a1 IR25a-GAL4/IR25a1	0	0	0	0		IR25a1 UAS-IR25a/IR25a1	0	0	0	33.33		IR25a1 IR25a-GAL4/IR25a1 UAS-IR25a	66.66	33.33	0	66.66
w1118	100	100	100	100		IR25a1/IR25a1	0	0	0	66.66		IR25a1 IR25a-GAL4/IR25a1	0	0	0	100		IR25a1 UAS-IR25a/IR25a1	0	0	0	66.66		IR25a1 IR25a-GAL4/IR25a1 UAS-IR25a	66.66	66.66	33.33	33.33
w1118	66.66	33.33	33.33	100		IR25a1/IR25a1	0	0	0	100		IR25a1 IR25a-GAL4/IR25a1	66.66	66.66	100	100		IR25a1 UAS-IR25a/IR25a1	0	0	0	0		IR25a1 IR25a-GAL4/IR25a1 UAS-IR25a	33.33	0	0	0
w1118	100	100	100	100		IR25a1/IR25a1	33.33	66.66	0	100		IR25a1 IR25a-GAL4/IR25a1	0	0	0	33.33		IR25a1 UAS-IR25a/IR25a1	0	33.33	0	66.66		IR25a1 IR25a-GAL4/IR25a1 UAS-IR25a	33.33	33.33	33.33	100
w1118	66.66	66.66	0	66.66								IR25a1 IR25a-GAL4/IR25a1	0	0	0	66.66		IR25a1 UAS-IR25a/IR25a1	0	0	33.33	0		IR25a1 IR25a-GAL4/IR25a1 UAS-IR25a	33.33	33.33	0	66.66
																		IR25a1 UAS-IR25a/IR25a1	66.66	0	66.66	100		IR25a1 IR25a-GAL4/IR25a1 UAS-IR25a	33.33	33.33	0	33.33
																		IR25a1 UAS-IR25a/IR25a1	0	0	0	33.33		IR25a1 IR25a-GAL4/IR25a1 UAS-IR25a	0	0	33.33	100
																		IR25a1 UAS-IR25a/IR25a1	0	0	0	0		IR25a1 IR25a-GAL4/IR25a1 UAS-IR25a	0	0	0	33.33
																		IR25a1 UAS-IR25a/IR25a1	0	0	0	66.66		IR25a1 IR25a-GAL4/IR25a1 UAS-IR25a	100	33.33	100	0
																								IR25a1 IR25a-GAL4/IR25a1 UAS-IR25a	100	66.66	0	0
																								IR25a1 IR25a-GAL4/IR25a1 UAS-IR25a	100	66.66	33.33	0
																								IR25a1 IR25a-GAL4/IR25a1 UAS-IR25a	0	33.33	0	66.66
																								IR25a1 IR25a-GAL4/IR25a1 UAS-IR25a	66.66	33.33	0	33.33
																								IR25a1 IR25a-GAL4/IR25a1 UAS-IR25a	100	33.33	0	66.66
																								IR25a1 IR25a-GAL4/IR25a1 UAS-IR25a	0	0	0	33.33
																								IR25a1 IR25a-GAL4/IR25a1 UAS-IR25a	0	0	0	66.66
																								IR25a1 IR25a-GAL4/IR25a1 UAS-IR25a	100	66.66	100	100
																								IR25a1 IR25a-GAL4/IR25a1 UAS-IR25a	33.33	33.33	0	100
																								IR25a1 IR25a-GAL4/IR25a1 UAS-IR25a	66.66	66.66	100	100
																								IR25a1 IR25a-GAL4/IR25a1 UAS-IR25a	0	33.33	0	33.33
																								IR25a1 IR25a-GAL4/IR25a1 UAS-IR25a	66.66	33.33	0	66.66
																								IR25a1 IR25a-GAL4/IR25a1 UAS-IR25a	33.33	66.66	100	100
																								IR25a1 IR25a-GAL4/IR25a1 UAS-IR25a	0	33.33	33.33	33.33
																								IR25a1 IR25a-GAL4/IR25a1 UAS-IR25a	33.33	33.33	33.33	0
																								IR25a1 IR25a-GAL4/IR25a1 UAS-IR25a	0	0	0	33.33
																								IR25a1 IR25a-GAL4/IR25a1 UAS-IR25a	66.66	33.33	0	66.66
																								IR25a1 IR25a-GAL4/IR25a1 UAS-IR25a	100	33.33	33.33	100
																								IR25a1 IR25a-GAL4/IR25a1 UAS-IR25a	33.33	33.33	0	66.66
																								IR25a1 IR25a-GAL4/IR25a1 UAS-IR25a	33.33	33.33	33.33	0
																								IR25a1 IR25a-GAL4/IR25a1 UAS-IR25a	66.66	33.33	0	0
																								IR25a1 IR25a-GAL4/IR25a1 UAS-IR25a	0	0	66.66	100
																								IR25a1 IR25a-GAL4/IR25a1 UAS-IR25a	100	66.66	33.33	100
																								IR25a1 IR25a-GAL4/IR25a1 UAS-IR25a	0	66.66	0	33.33
																								IR25a1 IR25a-GAL4/IR25a1 UAS-IR25a	100	33.33	0	100
																								IR25a1 IR25a-GAL4/IR25a1 UAS-IR25a	100	100	66.66	66.66
																								IR25a1 IR25a-GAL4/IR25a1 UAS-IR25a	66.66	0	0	66.66
																								IR25a1 IR25a-GAL4/IR25a1 UAS-IR25a	33.33	33.33	0	33.33
																								IR25a1 IR25a-GAL4/IR25a1 UAS-IR25a	100	100	0	33.33
																								IR25a1 IR25a-GAL4/IR25a1 UAS-IR25a	0	0	0	0
																								IR25a1 IR25a-GAL4/IR25a1 UAS-IR25a	100	66.66	0	100
																								IR25a1 IR25a-GAL4/IR25a1 UAS-IR25a	66.66	100	66.66	66.66
																								IR25a1 IR25a-GAL4/IR25a1 UAS-IR25a	33.33	33.33	0	100
																								IR25a1 IR25a-GAL4/IR25a1 UAS-IR25a	33.33	100	33.33	100
																								IR25a1 IR25a-GAL4/IR25a1 UAS-IR25a	33.33	0	0	100
																								IR25a1 IR25a-GAL4/IR25a1 UAS-IR25a	100	100	33.33	66.66
																								IR25a1 IR25a-GAL4/IR25a1 UAS-IR25a	100	100	0	100
																								IR25a1 IR25a-GAL4/IR25a1 UAS-IR25a	66.66	0	0	100
																								IR25a1 IR25a-GAL4/IR25a1 UAS-IR25a	100	0	0	66.66
																								IR25a1 IR25a-GAL4/IR25a1 UAS-IR25a	100	100	66.66	33.33
																								IR25a1 IR25a-GAL4/IR25a1 UAS-IR25a	0	33.33	0	0
																								IR25a1 IR25a-GAL4/IR25a1 UAS-IR25a	100	66.66	0	100
																								IR25a1 IR25a-GAL4/IR25a1 UAS-IR25a	33.33	0	0	0
																								IR25a1 IR25a-GAL4/IR25a1 UAS-IR25a	33.33	33.33	33.33	100
																								IR25a1 IR25a-GAL4/IR25a1 UAS-IR25a	100	100	100	100
																								IR25a1 IR25a-GAL4/IR25a1 UAS-IR25a	100	100	0	100
																								IR25a1 IR25a-GAL4/IR25a1 UAS-IR25a	0	0	0	100
																								IR25a1 IR25a-GAL4/IR25a1 UAS-IR25a	0	0	0	33.33
																								IR25a1 IR25a-GAL4/IR25a1 UAS-IR25a	0	33.33	33.33	100
																								IR25a1 IR25a-GAL4/IR25a1 UAS-IR25a	0	33.33	0	66.66
																								IR25a1 IR25a-GAL4/IR25a1 UAS-IR25a	0	0	0	66.66
																								IR25a1 IR25a-GAL4/IR25a1 UAS-IR25a	0	0	0	66.66
																								IR25a1 IR25a-GAL4/IR25a1 UAS-IR25a	0	33.33	33.33	0
																								IR25a1 IR25a-GAL4/IR25a1 UAS-IR25a	33.33	66.66	0	100
																								IR25a1 IR25a-GAL4/IR25a1 UAS-IR25a	33.33	33.33	0	100
																								IR25a1 IR25a-GAL4/IR25a1 UAS-IR25a	33.33	100	66.66	100
																								IR25a1 IR25a-GAL4/IR25a1 UAS-IR25a	66.66	33.33	33.33	100
																								IR25a1 IR25a-GAL4/IR25a1 UAS-IR25a	0	0	33.33	100
																								IR25a1 IR25a-GAL4/IR25a1 UAS-IR25a	0	0	33.33	100

## Sheet: Figure 3(B)
Figure 3-Source Data 1.
(B) PER responses of IR76b mutant flies to fatty acids
Genotype	1% Hexanoic acid	1% Octanoic acid	1% Linoleic acid	100 mM Sucrose		Genotype	1% Hexanoic acid	1% Octanoic acid	1% Linoleic acid	100 mM Sucrose		Genotype	1% Hexanoic acid	1% Octanoic acid	1% Linoleic acid	100 mM Sucrose		Genotype	1% Hexanoic acid	1% Octanoic acid	1% Linoleic acid	100 mM Sucrose		Genotype	1% Hexanoic acid	1% Octanoic acid	1% Linoleic acid	100 mM Sucrose
w1118	33.33	100	66.66	66.66		IR76b1/IR76b1	0	0	0	100		IR76b-GAL4/+;IR76b1/IR76b1	0	0	33.33	100		UAS-IR76b/+;IR76b1/IR76b1	33.33	0	0	100		IR76b-GAL4/UAS-IR76b;IR76b1/IR76b1	66.66	33.33	66.66	100
w1118	33.33	100	100	66.66		IR76b1/IR76b1	0	0	0	100		IR76b-GAL4/+;IR76b1/IR76b1	66.66	100	0	100		UAS-IR76b/+;IR76b1/IR76b1	66.66	0	0	100		IR76b-GAL4/UAS-IR76b;IR76b1/IR76b1	66.66	33.33	33.33	100
w1118	33.33	0	0	100		IR76b1/IR76b1	0	33.33	100	100		IR76b-GAL4/+;IR76b1/IR76b1	100	33.33	66.66	100		UAS-IR76b/+;IR76b1/IR76b1	0	0	33.33	100		IR76b-GAL4/UAS-IR76b;IR76b1/IR76b1	0	66.66	0	100
w1118	33.33	0	33.33	100		IR76b1/IR76b1	66.66	0	0	100		IR76b-GAL4/+;IR76b1/IR76b1	0	0	0	100		UAS-IR76b/+;IR76b1/IR76b1	0	100	100	100		IR76b-GAL4/UAS-IR76b;IR76b1/IR76b1	100	100	33.33	100
w1118	0	0	0	66.66		IR76b1/IR76b1	0	33.33	0	100		IR76b-GAL4/+;IR76b1/IR76b1	33.33	66.66	0	100		UAS-IR76b/+;IR76b1/IR76b1	0	66.66	0	100		IR76b-GAL4/UAS-IR76b;IR76b1/IR76b1	100	100	0	100
w1118	0	33.33	33.33	0		IR76b1/IR76b1	0	0	0	100		IR76b-GAL4/+;IR76b1/IR76b1	0	33.33	0	100		UAS-IR76b/+;IR76b1/IR76b1	0	0	0	33.33		IR76b-GAL4/UAS-IR76b;IR76b1/IR76b1	33.33	100	0	100
w1118	100	100	100	100		IR76b1/IR76b1	0	0	0	100		IR76b-GAL4/+;IR76b1/IR76b1	0	33.33	0	100		UAS-IR76b/+;IR76b1/IR76b1	0	0	0	100		IR76b-GAL4/UAS-IR76b;IR76b1/IR76b1	66.66	66.66	66.66	100
w1118	100	100	100	100		IR76b1/IR76b1	33.33	0	0	100		IR76b-GAL4/+;IR76b1/IR76b1	0	33.33	0	100		UAS-IR76b/+;IR76b1/IR76b1	0	0	0	100		IR76b-GAL4/UAS-IR76b;IR76b1/IR76b1	33.33	0	33.33	100
w1118	66.66	100	100	100		IR76b1/IR76b1	0	0	0	66.66		IR76b-GAL4/+;IR76b1/IR76b1	0	0	0	100		UAS-IR76b/+;IR76b1/IR76b1	66.66	66.66	100	100		IR76b-GAL4/UAS-IR76b;IR76b1/IR76b1	66.66	66.66	0	100
w1118	100	66.66	66.66	100		IR76b1/IR76b1	0	0	0	66.66		IR76b-GAL4/+;IR76b1/IR76b1	0	0	0	100		UAS-IR76b/+;IR76b1/IR76b1	66.66	0	0	100		IR76b-GAL4/UAS-IR76b;IR76b1/IR76b1	0	0	0	100
w1118	66.66	100	33.33	66.66		IR76b1/IR76b1	0	0	0	66.66		IR76b-GAL4/+;IR76b1/IR76b1	0	0	100	33.33		UAS-IR76b/+;IR76b1/IR76b1	0	0	0	66.66		IR76b-GAL4/UAS-IR76b;IR76b1/IR76b1	33.33	0	0	100
w1118	33.33	66.66	33.33	100		IR76b1/IR76b1	33.33	33.33	0	33.33		IR76b-GAL4/+;IR76b1/IR76b1	0	0	0	100		UAS-IR76b/+;IR76b1/IR76b1	66.66	0	0	100		IR76b-GAL4/UAS-IR76b;IR76b1/IR76b1	66.66	0	0	100
w1118	66.66	100	33.33	100		IR76b1/IR76b1	66.66	0	0	100		IR76b-GAL4/+;IR76b1/IR76b1	0	0	0	66.66		UAS-IR76b/+;IR76b1/IR76b1	0	0	33.33	66.66		IR76b-GAL4/UAS-IR76b;IR76b1/IR76b1	66.66	100	66.66	100
w1118	66.66	100	66.66	100		IR76b1/IR76b1	0	33.33	0	100		IR76b-GAL4/+;IR76b1/IR76b1	0	0	0	66.66		UAS-IR76b/+;IR76b1/IR76b1	0	100	33.33	66.66		IR76b-GAL4/UAS-IR76b;IR76b1/IR76b1	100	100	100	100
w1118	0	33.33	0	0		IR76b1/IR76b1	33.33	33.33	0	100		IR76b-GAL4/+;IR76b1/IR76b1	0	0	0	100		UAS-IR76b/+;IR76b1/IR76b1	33.33	33.33	66.66	100		IR76b-GAL4/UAS-IR76b;IR76b1/IR76b1	66.66	66.66	100	100
w1118	0	66.66	0	66.66		IR76b1/IR76b1	0	0	0	100		IR76b-GAL4/+;IR76b1/IR76b1	66.66	33.33	100	100		UAS-IR76b/+;IR76b1/IR76b1	0	0	0	100		IR76b-GAL4/UAS-IR76b;IR76b1/IR76b1	0	100	0	100
w1118	33.33	33.33	0	33.33		IR76b1/IR76b1	0	33.33	0	66.66		IR76b-GAL4/+;IR76b1/IR76b1	0	0	0	100		UAS-IR76b/+;IR76b1/IR76b1	0	0	0	100		IR76b-GAL4/UAS-IR76b;IR76b1/IR76b1	66.66	0	33.33	100
w1118	100	0	33.33	100		IR76b1/IR76b1	0	33.33	0	66.66		IR76b-GAL4/+;IR76b1/IR76b1	0	33.33	0	100		UAS-IR76b/+;IR76b1/IR76b1	0	0	0	100		IR76b-GAL4/UAS-IR76b;IR76b1/IR76b1	0	100	66.66	100
w1118	0	66.66	66.66	33.33		IR76b1/IR76b1	0	0	0	100		IR76b-GAL4/+;IR76b1/IR76b1	0	66.66	0	100		UAS-IR76b/+;IR76b1/IR76b1	66.66	0	0	100		IR76b-GAL4/UAS-IR76b;IR76b1/IR76b1	0	100	0	66.66
w1118	66.66	66.66	66.66	100		IR76b1/IR76b1	0	0	0	100		IR76b-GAL4/+;IR76b1/IR76b1	0	0	0	100		UAS-IR76b/+;IR76b1/IR76b1	0	33.33	33.33	66.66		IR76b-GAL4/UAS-IR76b;IR76b1/IR76b1	0	66.66	33.33	100
w1118	100	66.66	33.33	100		IR76b1/IR76b1	33.33	100	100	100		IR76b-GAL4/+;IR76b1/IR76b1	0	0	0	100		UAS-IR76b/+;IR76b1/IR76b1	0	0	0	100		IR76b-GAL4/UAS-IR76b;IR76b1/IR76b1	0	0	66.66	100
w1118	100	100	66.66	100		IR76b1/IR76b1	0	0	0	66.66		IR76b-GAL4/+;IR76b1/IR76b1	0	0	0	100		UAS-IR76b/+;IR76b1/IR76b1	100	100	0	100		IR76b-GAL4/UAS-IR76b;IR76b1/IR76b1	33.33	33.33	100	100
w1118	0	0	0	33.33		IR76b1/IR76b1	0	0	0	100		IR76b-GAL4/+;IR76b1/IR76b1	33.33	0	100	100		UAS-IR76b/+;IR76b1/IR76b1	0	66.66	0	100		IR76b-GAL4/UAS-IR76b;IR76b1/IR76b1	0	33.33	100	100
w1118	100	100	0	100		IR76b1/IR76b1	0	0	0	100		IR76b-GAL4/+;IR76b1/IR76b1	0	66.66	0	100		UAS-IR76b/+;IR76b1/IR76b1	66.66	0	0	100		IR76b-GAL4/UAS-IR76b;IR76b1/IR76b1	100	100	100	100
w1118	66.66	100	0	33.33		IR76b1/IR76b1	66.66	0	0	100		IR76b-GAL4/+;IR76b1/IR76b1	0	0	66.66	66.66		UAS-IR76b/+;IR76b1/IR76b1	0	33.33	100	100		IR76b-GAL4/UAS-IR76b;IR76b1/IR76b1	100	100	0	100
w1118	100	33.33	0	66.66		IR76b1/IR76b1	0	0	33.33	100		IR76b-GAL4/+;IR76b1/IR76b1	0	0	33.33	66.66		UAS-IR76b/+;IR76b1/IR76b1	0	0	66.66	100		IR76b-GAL4/UAS-IR76b;IR76b1/IR76b1	100	100	33.33	100
w1118	0	66.66	33.33	66.66		IR76b1/IR76b1	0	0	0	100		IR76b-GAL4/+;IR76b1/IR76b1	33.33	0	0	100		UAS-IR76b/+;IR76b1/IR76b1	0	0	0	100		IR76b-GAL4/UAS-IR76b;IR76b1/IR76b1	100	100	0	100
w1118	100	100	100	66.66		IR76b1/IR76b1	33.33	0	0	100		IR76b-GAL4/+;IR76b1/IR76b1	0	0	0	100		UAS-IR76b/+;IR76b1/IR76b1	0	0	0	100		IR76b-GAL4/UAS-IR76b;IR76b1/IR76b1	66.66	0	0	100
w1118	66.66	33.33	0	33.33		IR76b1/IR76b1	66.66	0	0	100		IR76b-GAL4/+;IR76b1/IR76b1	33.33	0	0	100		UAS-IR76b/+;IR76b1/IR76b1	100	100	100	66.66		IR76b-GAL4/UAS-IR76b;IR76b1/IR76b1	0	0	0	100
w1118	0	0	33.33	0		IR76b1/IR76b1	0	0	0	66.66		IR76b-GAL4/+;IR76b1/IR76b1	33.33	33.33	33.33	100		UAS-IR76b/+;IR76b1/IR76b1	0	0	0	100		IR76b-GAL4/UAS-IR76b;IR76b1/IR76b1	100	66.66	0	100
w1118	0	0	0	33.33		IR76b1/IR76b1	0	0	33.33	100		IR76b-GAL4/+;IR76b1/IR76b1	0	0	33.33	100		UAS-IR76b/+;IR76b1/IR76b1	0	0	0	33.33		IR76b-GAL4/UAS-IR76b;IR76b1/IR76b1	66.66	33.33	100	100
w1118	0	0	33.33	0		IR76b1/IR76b1	33.33	0	0	100		IR76b-GAL4/+;IR76b1/IR76b1	100	0	33.33	100		UAS-IR76b/+;IR76b1/IR76b1	0	0	100	100		IR76b-GAL4/UAS-IR76b;IR76b1/IR76b1	66.66	33.33	0	100
w1118	66.66	66.66	100	100		IR76b1/IR76b1	0	0	0	100		IR76b-GAL4/+;IR76b1/IR76b1	33.33	0	100	100		UAS-IR76b/+;IR76b1/IR76b1	0	0	0	66.66		IR76b-GAL4/UAS-IR76b;IR76b1/IR76b1	0	33.33	33.33	100
w1118	0	0	0	100		IR76b1/IR76b1	66.66	33.33	100	100		IR76b-GAL4/+;IR76b1/IR76b1	0	0	0	0		UAS-IR76b/+;IR76b1/IR76b1	0	33.33	0	100		IR76b-GAL4/UAS-IR76b;IR76b1/IR76b1	33.33	33.33	100	66.66
w1118	66.66	66.66	33.33	66.66		IR76b1/IR76b1	33.33	33.33	66.66	100		IR76b-GAL4/+;IR76b1/IR76b1	33.33	66.66	33.33	100								IR76b-GAL4/UAS-IR76b;IR76b1/IR76b1	0	33.33	33.33	100
w1118	66.66	66.66	66.66	66.66		IR76b1/IR76b1	0	0	33.33	100		IR76b-GAL4/+;IR76b1/IR76b1	0	0	0	100								IR76b-GAL4/UAS-IR76b;IR76b1/IR76b1	66.66	66.66	0	66.66
w1118	66.66	100	66.66	100		IR76b1/IR76b1	0	0	33.33	66.66		IR76b-GAL4/+;IR76b1/IR76b1	0	33.33	0	100								IR76b-GAL4/UAS-IR76b;IR76b1/IR76b1	33.33	66.66	66.66	100
w1118	0	100	66.66	100		IR76b1/IR76b1	100	66.66	66.66	100		IR76b-GAL4/+;IR76b1/IR76b1	0	0	0	100								IR76b-GAL4/UAS-IR76b;IR76b1/IR76b1	33.33	33.33	66.66	100
w1118	66.66	100	33.33	0		IR76b1/IR76b1	0	0	0	100		IR76b-GAL4/+;IR76b1/IR76b1	0	66.66	0	66.66								IR76b-GAL4/UAS-IR76b;IR76b1/IR76b1	0	0	0	100
w1118	0	0	0	66.66		IR76b1/IR76b1	33.33	33.33	33.33	33.33		IR76b-GAL4/+;IR76b1/IR76b1	33.33	0	0	100								IR76b-GAL4/UAS-IR76b;IR76b1/IR76b1	100	0	66.66	100
w1118	33.33	33.33	0	66.66		IR76b1/IR76b1	0	0	0	100		IR76b-GAL4/+;IR76b1/IR76b1	0	0	0	100								IR76b-GAL4/UAS-IR76b;IR76b1/IR76b1	0	0	0	100
w1118	100	100	100	100		IR76b1/IR76b1	0	0	0	100		IR76b-GAL4/+;IR76b1/IR76b1	0	0	33.33	100								IR76b-GAL4/UAS-IR76b;IR76b1/IR76b1	33.33	33.33	33.33	100
w1118	66.66	33.33	33.33	100		IR76b1/IR76b1	66.66	66.66	0	100		IR76b-GAL4/+;IR76b1/IR76b1	0	0	0	100								IR76b-GAL4/UAS-IR76b;IR76b1/IR76b1	66.66	33.33	0	100
w1118	66.66	100	100	100		IR76b1/IR76b1	33.33	0	0	100		IR76b-GAL4/+;IR76b1/IR76b1	66.66	33.33	0	100								IR76b-GAL4/UAS-IR76b;IR76b1/IR76b1	0	66.66	100	100
w1118	100	100	100	100		IR76b1/IR76b1	33.33	33.33	0	100		IR76b-GAL4/+;IR76b1/IR76b1	33.33	33.33	33.33	100								IR76b-GAL4/UAS-IR76b;IR76b1/IR76b1	0	66.66	33.33	100
w1118	33.33	66.66	33.33	33.33		IR76b1/IR76b1	33.33	0	0	100		IR76b-GAL4/+;IR76b1/IR76b1	0	0	33.33	66.66
w1118	66.66	100	0	66.66		IR76b1/IR76b1	33.33	0	100	100
w1118	33.33	33.33	0	0		IR76b1/IR76b1	0	0	0	66.66
w1118	33.33	33.33	0	66.66		IR76b1/IR76b1	66.66	66.66	0	100
w1118	0	0	0	66.66		IR76b1/IR76b1	0	0	0	100
w1118	33.33	33.33	0	66.66		IR76b1/IR76b1	33.33	0	0	100
w1118	100	33.33	66.66	100		IR76b1/IR76b1	0	66.66	33.33	66.66
w1118	33.33	0	66.66	33.33		IR76b1/IR76b1	66.66	66.66	33.33	100
w1118	33.33	66.66	100	66.66		IR76b1/IR76b1	0	0	66.66	100
w1118	33.33	0	0	66.66
w1118	66.66	66.66	0	0
w1118	66.66	33.33	33.33	66.66
w1118	0	66.66	33.33	33.33
w1118	66.66	0	0	66.66
w1118	0	0	0	0
w1118	0	100	0	33.33
w1118	0	0	0	100
w1118	0	66.66	0	33.33
w1118	100	100	100	100
w1118	33.33	33.33	0	66.66
w1118	66.66	33.33	33.33	33.33
w1118	0	33.33	0	0
w1118	66.66	33.33	66.66	100
w1118	66.66	0	66.66	66.66
w1118	33.33	33.33	33.33	66.66
w1118	33.33	100	66.66	33.33
w1118	66.66	0	33.33	33.33
w1118	0	0	0	33.33
w1118	33.33	0	0	66.66
w1118	0	0	0	66.66
w1118	0	0	0	33.33
w1118	0	0	0	100
w1118	33.33	33.33	0	33.33
w1118	0	33.33	0	0
w1118	66.66	0	0	100
w1118	0	0	0	33.33
w1118	33.33	33.33	100	66.66
w1118	0	66.66	0	66.66
w1118	0	33.33	0	100
w1118	0	0	33.33	100
w1118	100	33.33	33.33	100
w1118	66.66	0	0	33.33
w1118	66.66	33.33	0	66.66
w1118	66.66	33.33	100	33.33
w1118	100	0	0	66.66
w1118	0	0	33.33	33.33
w1118	100	66.66	66.66	33.33
w1118	66.66	100	100	100
w1118	100	0	0	100
w1118	100	33.33	0	66.66
w1118	33.33	66.66	0	33.33
w1118	100	33.33	0	66.66
w1118	66.66	100	100	100
w1118	100	100	100	100
w1118	100	100	66.66	100
w1118	66.66	66.66	33.33	33.33
w1118	33.33	33.33	33.33	66.66
w1118	66.66	33.33	100	0
w1118	66.66	100	100	100
w1118	0	0	66.66	33.33
w1118	0	0	0	0
w1118	66.66	0	0	66.66
w1118	33.33	66.66	33.33	66.66
w1118	66.66	100	0	100
w1118	66.66	33.33	66.66	66.66
w1118	33.33	33.33	0	100

## Sheet: Figure 3(C)
Figure 3-Source Data 1.
(C and D) PER responses to fatty acids of IR25a (C) or IR76b (D) mutant flies with UAS-IR25a or UAS-IR76b transgenes, respectively, under the control of Gr64f-GAL4.
Genotype	1% Hexanoic acid	1% Octanoic acid	1% Linoleic acid	100 mM Sucrose		Genotype	1% Hexanoic acid	1% Octanoic acid	1% Linoleic acid	100 mM Sucrose		Genotype	1% Hexanoic acid	1% Octanoic acid	1% Linoleic acid	100 mM Sucrose		Genotype	1% Hexanoic acid	1% Octanoic acid	1% Linoleic acid	100 mM Sucrose		Genotype	1% Hexanoic acid	1% Octanoic acid	1% Linoleic acid	100 mM Sucrose
w1118	0	33.33	33.33	100		IR25a1/IR25a1	33.33	0	0	33.33		IR25a1 Gr64f-GAL4/IR25a1	0	0	0	0		IR25a1 UAS-IR25a/IR25a1	0	0	0	66.66		IR25a1 Gr64f-GAL4/IR25a1 UAS-IR25a	0	0	0	33.33
w1118	66.66	33.33	0	100		IR25a1/IR25a1	0	0	0	100		IR25a1 Gr64f-GAL4/IR25a1	0	0	0	0		IR25a1 UAS-IR25a/IR25a1	0	0	0	0		IR25a1 Gr64f-GAL4/IR25a1 UAS-IR25a	100	66.66	66.66	100
w1118	66.66	0	100	100		IR25a1/IR25a1	66.66	33.33	0	100		IR25a1 Gr64f-GAL4/IR25a1	0	0	0	0		IR25a1 UAS-IR25a/IR25a1	33.33	33.33	0	66.66		IR25a1 Gr64f-GAL4/IR25a1 UAS-IR25a	0	33.33	0	0
w1118	66.66	33.33	0	0		IR25a1/IR25a1	0	0	0	0		IR25a1 Gr64f-GAL4/IR25a1	0	0	0	33.33		IR25a1 UAS-IR25a/IR25a1	33.33	0	66.66	100		IR25a1 Gr64f-GAL4/IR25a1 UAS-IR25a	33.33	0	66.66	33.33
w1118	0	33.33	0	66.66		IR25a1/IR25a1	0	0	0	33.33		IR25a1 Gr64f-GAL4/IR25a1	0	0	0	0		IR25a1 UAS-IR25a/IR25a1	0	0	0	100		IR25a1 Gr64f-GAL4/IR25a1 UAS-IR25a	33.33	66.66	0	0
w1118	33.33	66.66	0	100		IR25a1/IR25a1	0	0	0	33.33		IR25a1 Gr64f-GAL4/IR25a1	0	0	0	66.66		IR25a1 UAS-IR25a/IR25a1	0	0	0	0		IR25a1 Gr64f-GAL4/IR25a1 UAS-IR25a	33.33	33.33	33.33	33.33
w1118	66.66	100	66.66	66.66		IR25a1/IR25a1	100	66.66	0	100		IR25a1 Gr64f-GAL4/IR25a1	0	0	0	100		IR25a1 UAS-IR25a/IR25a1	0	0	0	0		IR25a1 Gr64f-GAL4/IR25a1 UAS-IR25a	0	66.66	0	66.66
w1118	33.33	66.66	0	100		IR25a1/IR25a1	0	0	0	100		IR25a1 Gr64f-GAL4/IR25a1	0	0	0	0		IR25a1 UAS-IR25a/IR25a1	0	0	0	0		IR25a1 Gr64f-GAL4/IR25a1 UAS-IR25a	66.66	66.66	100	100
w1118	100	100	100	100		IR25a1/IR25a1	0	0	0	0		IR25a1 Gr64f-GAL4/IR25a1	0	0	0	0		IR25a1 UAS-IR25a/IR25a1	0	0	0	100		IR25a1 Gr64f-GAL4/IR25a1 UAS-IR25a	66.66	100	66.66	100
w1118	100	33.33	100	66.66		IR25a1/IR25a1	0	0	0	66.66		IR25a1 Gr64f-GAL4/IR25a1	0	0	33.33	33.33		IR25a1 UAS-IR25a/IR25a1	0	33.33	0	100		IR25a1 Gr64f-GAL4/IR25a1 UAS-IR25a	100	0	33.33	100
w1118	66.66	100	100	100		IR25a1/IR25a1	0	0	33.33	66.66		IR25a1 Gr64f-GAL4/IR25a1	0	33.33	0	100		IR25a1 UAS-IR25a/IR25a1	0	33.33	33.33	100		IR25a1 Gr64f-GAL4/IR25a1 UAS-IR25a	66.66	66.66	100	66.66
w1118	100	66.66	66.66	66.66		IR25a1/IR25a1	0	0	0	100		IR25a1 Gr64f-GAL4/IR25a1	0	0	66.66	66.66		IR25a1 UAS-IR25a/IR25a1	0	0	0	0		IR25a1 Gr64f-GAL4/IR25a1 UAS-IR25a	0	0	0	100
w1118	0	0	0	33.33		IR25a1/IR25a1	66.66	0	33.33	100		IR25a1 Gr64f-GAL4/IR25a1	0	0	0	0		IR25a1 UAS-IR25a/IR25a1	100	33.33	0	100		IR25a1 Gr64f-GAL4/IR25a1 UAS-IR25a	33.33	33.33	66.66	100
w1118	100	100	33.33	66.66		IR25a1/IR25a1	0	0	0	66.66		IR25a1 Gr64f-GAL4/IR25a1	0	0	0	0		IR25a1 UAS-IR25a/IR25a1	0	0	0	33.33		IR25a1 Gr64f-GAL4/IR25a1 UAS-IR25a	0	0	0	33.33
w1118	100	66.66	33.33	33.33		IR25a1/IR25a1	0	0	0	33.33		IR25a1 Gr64f-GAL4/IR25a1	0	0	0	33.33		IR25a1 UAS-IR25a/IR25a1	0	0	0	0		IR25a1 Gr64f-GAL4/IR25a1 UAS-IR25a	0	33.33	66.66	66.66
w1118	0	0	0	66.66		IR25a1/IR25a1	0	0	0	66.66		IR25a1 Gr64f-GAL4/IR25a1	0	0	0	66.66		IR25a1 UAS-IR25a/IR25a1	0	0	33.33	66.66		IR25a1 Gr64f-GAL4/IR25a1 UAS-IR25a	66.66	100	66.66	66.66
w1118	0	33.33	0	33.33		IR25a1/IR25a1	0	66.66	33.33	100		IR25a1 Gr64f-GAL4/IR25a1	0	0	0	0		IR25a1 UAS-IR25a/IR25a1	0	0	33.33	33.33		IR25a1 Gr64f-GAL4/IR25a1 UAS-IR25a	33.33	0	0	33.33
w1118	100	100	100	100		IR25a1/IR25a1	33.33	0	66.66	100		IR25a1 Gr64f-GAL4/IR25a1	0	33.33	66.66	100		IR25a1 UAS-IR25a/IR25a1	0	33.33	0	100		IR25a1 Gr64f-GAL4/IR25a1 UAS-IR25a	0	0	0	66.66
w1118	33.33	66.66	33.33	100		IR25a1/IR25a1	0	0	0	66.66		IR25a1 Gr64f-GAL4/IR25a1	0	0	0	0		IR25a1 UAS-IR25a/IR25a1	0	33.33	0	100		IR25a1 Gr64f-GAL4/IR25a1 UAS-IR25a	100	66.66	66.66	100
w1118	0	100	33.33	66.66		IR25a1/IR25a1	0	0	0	33.33		IR25a1 Gr64f-GAL4/IR25a1	0	0	0	33.33		IR25a1 UAS-IR25a/IR25a1	33.33	66.66	66.66	100		IR25a1 Gr64f-GAL4/IR25a1 UAS-IR25a	0	0	33.33	100
w1118	0	0	33.33	0		IR25a1/IR25a1	0	33.33	0	100		IR25a1 Gr64f-GAL4/IR25a1	0	0	33.33	66.66		IR25a1 UAS-IR25a/IR25a1	0	0	33.33	100		IR25a1 Gr64f-GAL4/IR25a1 UAS-IR25a	0	100	33.33	100
w1118	66.66	0	0	33.33		IR25a1/IR25a1	0	0	33.33	100		IR25a1 Gr64f-GAL4/IR25a1	0	0	0	33.33		IR25a1 UAS-IR25a/IR25a1	0	0	0	0		IR25a1 Gr64f-GAL4/IR25a1 UAS-IR25a	100	0	0	66.66
w1118	66.66	0	66.66	66.66		IR25a1/IR25a1	0	0	0	100		IR25a1 Gr64f-GAL4/IR25a1	0	0	0	33.33		IR25a1 UAS-IR25a/IR25a1	0	0	0	0		IR25a1 Gr64f-GAL4/IR25a1 UAS-IR25a	0	0	0	33.33
w1118	100	33.33	66.66	100		IR25a1/IR25a1	0	0	66.66	0		IR25a1 Gr64f-GAL4/IR25a1	0	0	0	0		IR25a1 UAS-IR25a/IR25a1	0	0	33.33	33.33		IR25a1 Gr64f-GAL4/IR25a1 UAS-IR25a	0	0	0	100
w1118	33.33	0	33.33	66.66		IR25a1/IR25a1	66.66	33.33	33.33	66.66		IR25a1 Gr64f-GAL4/IR25a1	0	0	100	33.33		IR25a1 UAS-IR25a/IR25a1	66.66	33.33	100	100		IR25a1 Gr64f-GAL4/IR25a1 UAS-IR25a	0	0	0	100
w1118	0	0	0	66.66		IR25a1/IR25a1	0	0	0	100		IR25a1 Gr64f-GAL4/IR25a1	0	0	0	66.66		IR25a1 UAS-IR25a/IR25a1	0	0	0	0		IR25a1 Gr64f-GAL4/IR25a1 UAS-IR25a	66.66	0	33.33	66.66
w1118	100	66.66	0	100		IR25a1/IR25a1	0	0	0	100		IR25a1 Gr64f-GAL4/IR25a1	0	0	0	0		IR25a1 UAS-IR25a/IR25a1	33.33	0	0	0		IR25a1 Gr64f-GAL4/IR25a1 UAS-IR25a	33.33	0	66.66	0
w1118	0	0	0	100		IR25a1/IR25a1	0	0	0	100		IR25a1 Gr64f-GAL4/IR25a1	0	0	0	0		IR25a1 UAS-IR25a/IR25a1	0	0	0	0		IR25a1 Gr64f-GAL4/IR25a1 UAS-IR25a	33.33	100	100	66.66
w1118	100	100	66.66	33.33		IR25a1/IR25a1	0	0	0	0		IR25a1 Gr64f-GAL4/IR25a1	0	33.33	33.33	0		IR25a1 UAS-IR25a/IR25a1	0	0	33.33	0		IR25a1 Gr64f-GAL4/IR25a1 UAS-IR25a	0	0	0	0
w1118	0	0	0	100		IR25a1/IR25a1	0	33.33	33.33	100		IR25a1 Gr64f-GAL4/IR25a1	0	0	33.33	66.66		IR25a1 UAS-IR25a/IR25a1	0	0	0	33.33		IR25a1 Gr64f-GAL4/IR25a1 UAS-IR25a	0	0	0	0
w1118	33.33	100	100	100		IR25a1/IR25a1	0	0	0	0		IR25a1 Gr64f-GAL4/IR25a1	0	0	33.33	100		IR25a1 UAS-IR25a/IR25a1	0	0	33.33	66.66		IR25a1 Gr64f-GAL4/IR25a1 UAS-IR25a	100	100	100	100
w1118	100	100	33.33	100		IR25a1/IR25a1	33.33	0	0	100		IR25a1 Gr64f-GAL4/IR25a1	0	0	0	33.33		IR25a1 UAS-IR25a/IR25a1	0	0	0	66.66		IR25a1 Gr64f-GAL4/IR25a1 UAS-IR25a	33.33	66.66	100	100
w1118	0	0	0	66.66		IR25a1/IR25a1	0	0	33.33	100		IR25a1 Gr64f-GAL4/IR25a1	0	0	0	0		IR25a1 UAS-IR25a/IR25a1	66.66	100	0	100		IR25a1 Gr64f-GAL4/IR25a1 UAS-IR25a	66.66	33.33	66.66	100
w1118	66.66	33.33	0	66.66		IR25a1/IR25a1	0	0	0	33.33		IR25a1 Gr64f-GAL4/IR25a1	0	0	0	33.33		IR25a1 UAS-IR25a/IR25a1	0	33.33	33.33	100		IR25a1 Gr64f-GAL4/IR25a1 UAS-IR25a	66.66	66.66	0	66.66
w1118	0	33.33	0	66.66		IR25a1/IR25a1	0	0	0	0		IR25a1 Gr64f-GAL4/IR25a1	0	0	0	33.33		IR25a1 UAS-IR25a/IR25a1	0	33.33	100	100		IR25a1 Gr64f-GAL4/IR25a1 UAS-IR25a	0	0	66.66	0
w1118	0	33.33	0	33.33		IR25a1/IR25a1	33.33	0	0	100		IR25a1 Gr64f-GAL4/IR25a1	0	0	0	66.66		IR25a1 UAS-IR25a/IR25a1	0	33.33	0	100		IR25a1 Gr64f-GAL4/IR25a1 UAS-IR25a	66.66	100	100	100
w1118	33.33	33.33	0	100		IR25a1/IR25a1	0	33.33	33.33	100		IR25a1 Gr64f-GAL4/IR25a1	0	0	33.33	0		IR25a1 UAS-IR25a/IR25a1	0	0	0	66.66		IR25a1 Gr64f-GAL4/IR25a1 UAS-IR25a	33.33	0	0	100
w1118	66.66	33.33	33.33	33.33		IR25a1/IR25a1	0	33.33	66.66	100		IR25a1 Gr64f-GAL4/IR25a1	0	0	0	100		IR25a1 UAS-IR25a/IR25a1	0	0	0	100		IR25a1 Gr64f-GAL4/IR25a1 UAS-IR25a	0	0	0	33.33
w1118	0	0	100	33.33		IR25a1/IR25a1	0	0	0	100		IR25a1 Gr64f-GAL4/IR25a1	0	0	0	0		IR25a1 UAS-IR25a/IR25a1	100	33.33	0	100		IR25a1 Gr64f-GAL4/IR25a1 UAS-IR25a	0	33.33	33.33	66.66
w1118	0	0	0	33.33		IR25a1/IR25a1	0	0	0	100		IR25a1 Gr64f-GAL4/IR25a1	0	0	0	33.33		IR25a1 UAS-IR25a/IR25a1	0	0	66.66	100		IR25a1 Gr64f-GAL4/IR25a1 UAS-IR25a	33.33	0	0	33.33
w1118	33.33	0	0	33.33		IR25a1/IR25a1	0	66.66	33.33	66.66		IR25a1 Gr64f-GAL4/IR25a1	0	0	0	100		IR25a1 UAS-IR25a/IR25a1	0	0	0	0		IR25a1 Gr64f-GAL4/IR25a1 UAS-IR25a	66.66	66.66	100	66.66
w1118	66.66	66.66	33.33	33.33								IR25a1 Gr64f-GAL4/IR25a1	33.33	33.33	0	100		IR25a1 UAS-IR25a/IR25a1	0	33.33	0	100		IR25a1 Gr64f-GAL4/IR25a1 UAS-IR25a	33.33	66.66	66.66	33.33
w1118	66.66	66.66	100	100								IR25a1 Gr64f-GAL4/IR25a1	0	0	0	0		IR25a1 UAS-IR25a/IR25a1	33.33	33.33	0	100		IR25a1 Gr64f-GAL4/IR25a1 UAS-IR25a	66.66	66.66	66.66	33.33
w1118	33.33	100	0	33.33								IR25a1 Gr64f-GAL4/IR25a1	0	33.33	0	100		IR25a1 UAS-IR25a/IR25a1	0	0	0	100		IR25a1 Gr64f-GAL4/IR25a1 UAS-IR25a	33.33	66.66	66.66	100
w1118	0	0	100	100								IR25a1 Gr64f-GAL4/IR25a1	0	0	0	0		IR25a1 UAS-IR25a/IR25a1	33.33	33.33	0	100		IR25a1 Gr64f-GAL4/IR25a1 UAS-IR25a	100	100	100	100
w1118	33.33	100	100	100								IR25a1 Gr64f-GAL4/IR25a1	0	33.33	0	0		IR25a1 UAS-IR25a/IR25a1	0	0	0	100		IR25a1 Gr64f-GAL4/IR25a1 UAS-IR25a	0	0	100	100
w1118	0	100	66.66	66.66								IR25a1 Gr64f-GAL4/IR25a1	0	0	33.33	100		IR25a1 UAS-IR25a/IR25a1	0	0	0	100		IR25a1 Gr64f-GAL4/IR25a1 UAS-IR25a	0	0	33.33	0
												IR25a1 Gr64f-GAL4/IR25a1	0	0	0	0		IR25a1 UAS-IR25a/IR25a1	0	0	0	33.33		IR25a1 Gr64f-GAL4/IR25a1 UAS-IR25a	100	100	66.66	66.66
												IR25a1 Gr64f-GAL4/IR25a1	0	0	0	0		IR25a1 UAS-IR25a/IR25a1	0	0	0	0		IR25a1 Gr64f-GAL4/IR25a1 UAS-IR25a	33.33	66.66	100	0
												IR25a1 Gr64f-GAL4/IR25a1	33.33	100	100	100		IR25a1 UAS-IR25a/IR25a1	66.66	33.33	0	100		IR25a1 Gr64f-GAL4/IR25a1 UAS-IR25a	33.33	0	33.33	66.66
												IR25a1 Gr64f-GAL4/IR25a1	33.33	0	33.33	100		IR25a1 UAS-IR25a/IR25a1	0	0	0	0		IR25a1 Gr64f-GAL4/IR25a1 UAS-IR25a	66.66	33.33	66.66	0
												IR25a1 Gr64f-GAL4/IR25a1	33.33	33.33	100	100		IR25a1 UAS-IR25a/IR25a1	66.66	33.33	33.33	100		IR25a1 Gr64f-GAL4/IR25a1 UAS-IR25a	66.66	66.66	0	33.33
												IR25a1 Gr64f-GAL4/IR25a1	66.66	100	66.66	100		IR25a1 UAS-IR25a/IR25a1	0	0	0	66.66		IR25a1 Gr64f-GAL4/IR25a1 UAS-IR25a	0	66.66	0	100
												IR25a1 Gr64f-GAL4/IR25a1	0	0	33.33	33.33		IR25a1 UAS-IR25a/IR25a1	33.33	66.66	66.66	100		IR25a1 Gr64f-GAL4/IR25a1 UAS-IR25a	100	66.66	66.66	100
												IR25a1 Gr64f-GAL4/IR25a1	0	0	0	0		IR25a1 UAS-IR25a/IR25a1	0	33.33	33.33	0		IR25a1 Gr64f-GAL4/IR25a1 UAS-IR25a	0	0	0	33.33
												IR25a1 Gr64f-GAL4/IR25a1	0	0	0	66.66		IR25a1 UAS-IR25a/IR25a1	0	0	0	100		IR25a1 Gr64f-GAL4/IR25a1 UAS-IR25a	0	0	0	33.33
												IR25a1 Gr64f-GAL4/IR25a1	0	0	0	0		IR25a1 UAS-IR25a/IR25a1	0	0	0	100		IR25a1 Gr64f-GAL4/IR25a1 UAS-IR25a	0	0	0	0
												IR25a1 Gr64f-GAL4/IR25a1	0	0	0	0		IR25a1 UAS-IR25a/IR25a1	0	0	0	0		IR25a1 Gr64f-GAL4/IR25a1 UAS-IR25a	0	0	0	66.66
												IR25a1 Gr64f-GAL4/IR25a1	0	0	0	0		IR25a1 UAS-IR25a/IR25a1	0	0	0	66.66		IR25a1 Gr64f-GAL4/IR25a1 UAS-IR25a	100	66.66	0	66.66
												IR25a1 Gr64f-GAL4/IR25a1	0	0	0	33.33		IR25a1 UAS-IR25a/IR25a1	33.33	0	0	66.66		IR25a1 Gr64f-GAL4/IR25a1 UAS-IR25a	0	33.33	0	100
												IR25a1 Gr64f-GAL4/IR25a1	0	0	0	66.66		IR25a1 UAS-IR25a/IR25a1	0	33.33	0	0		IR25a1 Gr64f-GAL4/IR25a1 UAS-IR25a	0	33.33	33.33	66.66
												IR25a1 Gr64f-GAL4/IR25a1	0	0	0	0		IR25a1 UAS-IR25a/IR25a1	0	0	0	0		IR25a1 Gr64f-GAL4/IR25a1 UAS-IR25a	0	33.33	0	33.33
												IR25a1 Gr64f-GAL4/IR25a1	0	0	0	100		IR25a1 UAS-IR25a/IR25a1	0	0	0	33.33		IR25a1 Gr64f-GAL4/IR25a1 UAS-IR25a	33.33	33.33	33.33	100
												IR25a1 Gr64f-GAL4/IR25a1	0	0	33.33	0		IR25a1 UAS-IR25a/IR25a1	0	0	0	100		IR25a1 Gr64f-GAL4/IR25a1 UAS-IR25a	66.66	66.66	0	100
												IR25a1 Gr64f-GAL4/IR25a1	0	33.33	0	0		IR25a1 UAS-IR25a/IR25a1	0	0	0	33.33		IR25a1 Gr64f-GAL4/IR25a1 UAS-IR25a	33.33	0	0	100
																		IR25a1 UAS-IR25a/IR25a1	66.66	66.66	66.66	100		IR25a1 Gr64f-GAL4/IR25a1 UAS-IR25a	66.66	66.66	100	33.33
																		IR25a1 UAS-IR25a/IR25a1	0	0	0	0		IR25a1 Gr64f-GAL4/IR25a1 UAS-IR25a	0	0	33.33	0
																		IR25a1 UAS-IR25a/IR25a1	0	0	0	100		IR25a1 Gr64f-GAL4/IR25a1 UAS-IR25a	100	66.66	33.33	66.66
																		IR25a1 UAS-IR25a/IR25a1	0	0	33.33	33.33		IR25a1 Gr64f-GAL4/IR25a1 UAS-IR25a	0	0	33.33	66.66
																		IR25a1 UAS-IR25a/IR25a1	0	33.33	0	100		IR25a1 Gr64f-GAL4/IR25a1 UAS-IR25a	0	66.66	0	33.33
																								IR25a1 Gr64f-GAL4/IR25a1 UAS-IR25a	66.66	66.66	66.66	0
																								IR25a1 Gr64f-GAL4/IR25a1 UAS-IR25a	0	0	33.33	100
																								IR25a1 Gr64f-GAL4/IR25a1 UAS-IR25a	0	0	0	33.33
																								IR25a1 Gr64f-GAL4/IR25a1 UAS-IR25a	100	100	0	100
																								IR25a1 Gr64f-GAL4/IR25a1 UAS-IR25a	100	100	0	66.66
																								IR25a1 Gr64f-GAL4/IR25a1 UAS-IR25a	0	0	0	33.33
																								IR25a1 Gr64f-GAL4/IR25a1 UAS-IR25a	0	0	66.66	100
																								IR25a1 Gr64f-GAL4/IR25a1 UAS-IR25a	0	0	0	33.33
																								IR25a1 Gr64f-GAL4/IR25a1 UAS-IR25a	33.33	66.66	0	66.66
																								IR25a1 Gr64f-GAL4/IR25a1 UAS-IR25a	0	66.66	66.66	0
																								IR25a1 Gr64f-GAL4/IR25a1 UAS-IR25a	33.33	33.33	33.33	0
																								IR25a1 Gr64f-GAL4/IR25a1 UAS-IR25a	100	0	33.33	33.33
																								IR25a1 Gr64f-GAL4/IR25a1 UAS-IR25a	0	0	0	0
																								IR25a1 Gr64f-GAL4/IR25a1 UAS-IR25a	33.33	0	0	33.33
																								IR25a1 Gr64f-GAL4/IR25a1 UAS-IR25a	0	33.33	33.33	33.33
																								IR25a1 Gr64f-GAL4/IR25a1 UAS-IR25a	33.33	100	33.33	0
																								IR25a1 Gr64f-GAL4/IR25a1 UAS-IR25a	0	0	33.33	0
																								IR25a1 Gr64f-GAL4/IR25a1 UAS-IR25a	0	0	0	0
																								IR25a1 Gr64f-GAL4/IR25a1 UAS-IR25a	33.33	0	66.66	33.33
																								IR25a1 Gr64f-GAL4/IR25a1 UAS-IR25a	100	33.33	0	100
																								IR25a1 Gr64f-GAL4/IR25a1 UAS-IR25a	66.66	0	0	100
																								IR25a1 Gr64f-GAL4/IR25a1 UAS-IR25a	0	0	66.66	0
																								IR25a1 Gr64f-GAL4/IR25a1 UAS-IR25a	0	33.33	0	100
																								IR25a1 Gr64f-GAL4/IR25a1 UAS-IR25a	0	0	0	0
																								IR25a1 Gr64f-GAL4/IR25a1 UAS-IR25a	0	0	0	33.33
																								IR25a1 Gr64f-GAL4/IR25a1 UAS-IR25a	0	66.66	66.66	66.66
																								IR25a1 Gr64f-GAL4/IR25a1 UAS-IR25a	66.66	0	0	100
																								IR25a1 Gr64f-GAL4/IR25a1 UAS-IR25a	0	0	0	100
																								IR25a1 Gr64f-GAL4/IR25a1 UAS-IR25a	0	0	0	100
																								IR25a1 Gr64f-GAL4/IR25a1 UAS-IR25a	0	0	0	33.33
																								IR25a1 Gr64f-GAL4/IR25a1 UAS-IR25a	66.66	100	100	66.66
																								IR25a1 Gr64f-GAL4/IR25a1 UAS-IR25a	100	100	0	33.33
																								IR25a1 Gr64f-GAL4/IR25a1 UAS-IR25a	66.66	100	0	33.33
																								IR25a1 Gr64f-GAL4/IR25a1 UAS-IR25a	0	0	0	0
																								IR25a1 Gr64f-GAL4/IR25a1 UAS-IR25a	0	100	100	66.66
																								IR25a1 Gr64f-GAL4/IR25a1 UAS-IR25a	100	0	100	33.33
																								IR25a1 Gr64f-GAL4/IR25a1 UAS-IR25a	0	0	0	0
																								IR25a1 Gr64f-GAL4/IR25a1 UAS-IR25a	0	33.33	66.66	0
																								IR25a1 Gr64f-GAL4/IR25a1 UAS-IR25a	33.33	0	66.66	66.66
																								IR25a1 Gr64f-GAL4/IR25a1 UAS-IR25a	100	66.66	0	0
																								IR25a1 Gr64f-GAL4/IR25a1 UAS-IR25a	100	100	66.66	33.33
																								IR25a1 Gr64f-GAL4/IR25a1 UAS-IR25a	0	0	66.66	0
																								IR25a1 Gr64f-GAL4/IR25a1 UAS-IR25a	100	100	100	33.33
																								IR25a1 Gr64f-GAL4/IR25a1 UAS-IR25a	0	0	0	33.33
																								IR25a1 Gr64f-GAL4/IR25a1 UAS-IR25a	100	100	66.66	100
																								IR25a1 Gr64f-GAL4/IR25a1 UAS-IR25a	0	0	0	33.33
																								IR25a1 Gr64f-GAL4/IR25a1 UAS-IR25a	0	66.66	0	100
																								IR25a1 Gr64f-GAL4/IR25a1 UAS-IR25a	0	0	0	66.66
																								IR25a1 Gr64f-GAL4/IR25a1 UAS-IR25a	100	66.66	66.66	66.66
																								IR25a1 Gr64f-GAL4/IR25a1 UAS-IR25a	0	66.66	0	66.66
																								IR25a1 Gr64f-GAL4/IR25a1 UAS-IR25a	100	100	100	100
																								IR25a1 Gr64f-GAL4/IR25a1 UAS-IR25a	0	33.33	0	66.66
																								IR25a1 Gr64f-GAL4/IR25a1 UAS-IR25a	0	0	0	33.33
																								IR25a1 Gr64f-GAL4/IR25a1 UAS-IR25a	100	0	100	100

## Sheet: Figure 3(D)
Figure 3-Source Data 1.
(C and D) PER responses to fatty acids of IR25a (C) or IR76b (D) mutant flies with UAS-IR25a or UAS-IR76b transgenes, respectively, under the control of Gr64f-GAL4.
Genotype	1% Hexanoic acid	1% Octanoic acid	1% Linoleic acid	100 mM Sucrose		Genotype	1% Hexanoic acid	1% Octanoic acid	1% Linoleic acid	100 mM Sucrose		Genotype	1% Hexanoic acid	1% Octanoic acid	1% Linoleic acid	100 mM Sucrose		Genotype	1% Hexanoic acid	1% Octanoic acid	1% Linoleic acid	100 mM Sucrose		Genotype	1% Hexanoic acid	1% Octanoic acid	1% Linoleic acid	100 mM Sucrose
w1118	100	100	100	100		IR76b2/IR76b2	0	0	0	33.33		Gr64f-GAL4/+;IR76b2/IR76b2	0	0	0	100		UAS-IR76b/+;IR76b2/IR76b2	33.33	0	0	100		Gr64f-GAL4/UAS-IR76b;IR76b2/IR762	0	0	33.33	100
w1118	100	100	100	100		IR76b2/IR76b2	0	0	0	66.66		Gr64f-GAL4/+;IR76b2/IR76b2	33.33	0	0	100		UAS-IR76b/+;IR76b2/IR76b2	0	0	0	100		Gr64f-GAL4/UAS-IR76b;IR76b2/IR762	0	0	0	100
w1118	100	0	33.33	33.33		IR76b2/IR76b2	33.33	33.33	33.33	100		Gr64f-GAL4/+;IR76b2/IR76b2	0	33.33	33.33	33.33		UAS-IR76b/+;IR76b2/IR76b2	0	0	33.33	100		Gr64f-GAL4/UAS-IR76b;IR76b2/IR762	66.66	33.33	33.33	66.66
w1118	100	66.66	33.33	100		IR76b2/IR76b2	0	33.33	0	0		Gr64f-GAL4/+;IR76b2/IR76b2	0	0	0	100		UAS-IR76b/+;IR76b2/IR76b2	0	0	66.66	100		Gr64f-GAL4/UAS-IR76b;IR76b2/IR762	0	33.33	100	100
w1118	0	0	66.66	100		IR76b2/IR76b2	0	0	0	33.33		Gr64f-GAL4/+;IR76b2/IR76b2	0	0	0	100		UAS-IR76b/+;IR76b2/IR76b2	0	0	33.33	100		Gr64f-GAL4/UAS-IR76b;IR76b2/IR762	66.66	0	0	100
w1118	33.33	33.33	100	100		IR76b2/IR76b2	33.33	0	33.33	100		Gr64f-GAL4/+;IR76b2/IR76b2	0	0	66.66	100		UAS-IR76b/+;IR76b2/IR76b2	0	0	0	100		Gr64f-GAL4/UAS-IR76b;IR76b2/IR762	66.66	66.66	0	100
w1118	66.66	66.66	100	100		IR76b2/IR76b2	33.33	0	0	100		Gr64f-GAL4/+;IR76b2/IR76b2	0	0	0	33.33		UAS-IR76b/+;IR76b2/IR76b2	0	33.33	66.66	100		Gr64f-GAL4/UAS-IR76b;IR76b2/IR762	100	100	100	100
w1118	66.66	0	33.33	100		IR76b2/IR76b2	0	0	33.33	100		Gr64f-GAL4/+;IR76b2/IR76b2	0	0	0	66.66		UAS-IR76b/+;IR76b2/IR76b2	33.33	66.66	0	100		Gr64f-GAL4/UAS-IR76b;IR76b2/IR762	0	0	0	100
w1118	66.66	100	100	100		IR76b2/IR76b2	33.33	0	66.66	100		Gr64f-GAL4/+;IR76b2/IR76b2	0	33.33	33.33	100		UAS-IR76b/+;IR76b2/IR76b2	0	33.33	0	100		Gr64f-GAL4/UAS-IR76b;IR76b2/IR762	100	66.66	0	100
w1118	33.33	0	33.33	100		IR76b2/IR76b2	0	33.33	0	100		Gr64f-GAL4/+;IR76b2/IR76b2	0	0	0	100		UAS-IR76b/+;IR76b2/IR76b2	0	0	33.33	100		Gr64f-GAL4/UAS-IR76b;IR76b2/IR762	0	0	0	66.66
w1118	100	66.66	0	100		IR76b2/IR76b2	0	0	0	100		Gr64f-GAL4/+;IR76b2/IR76b2	33.33	0	0	100		UAS-IR76b/+;IR76b2/IR76b2	33.33	0	66.66	100		Gr64f-GAL4/UAS-IR76b;IR76b2/IR762	0	0	33.33	100
w1118	66.66	66.66	33.33	66.66		IR76b2/IR76b2	0	0	0	100		Gr64f-GAL4/+;IR76b2/IR76b2	33.33	0	0	100		UAS-IR76b/+;IR76b2/IR76b2	0	0	0	66.66		Gr64f-GAL4/UAS-IR76b;IR76b2/IR762	100	33.33	66.66	33.33
w1118	0	33.33	0	0		IR76b2/IR76b2	0	0	33.33	100		Gr64f-GAL4/+;IR76b2/IR76b2	0	0	0	33.33		UAS-IR76b/+;IR76b2/IR76b2	0	0	0	100		Gr64f-GAL4/UAS-IR76b;IR76b2/IR762	0	0	100	100
w1118	33.33	66.66	66.66	100		IR76b2/IR76b2	0	0	33.33	100		Gr64f-GAL4/+;IR76b2/IR76b2	66.66	33.33	66.66	100		UAS-IR76b/+;IR76b2/IR76b2	0	0	0	100		Gr64f-GAL4/UAS-IR76b;IR76b2/IR762	100	66.66	0	100
w1118	0	0	0	66.66		IR76b2/IR76b2	33.33	0	0	100		Gr64f-GAL4/+;IR76b2/IR76b2	66.66	66.66	0	100		UAS-IR76b/+;IR76b2/IR76b2	0	0	0	100		Gr64f-GAL4/UAS-IR76b;IR76b2/IR762	100	100	66.66	100
w1118	66.66	33.33	33.33	66.66		IR76b2/IR76b2	0	0	0	100		Gr64f-GAL4/+;IR76b2/IR76b2	0	33.33	0	100		UAS-IR76b/+;IR76b2/IR76b2	33.33	0	0	100		Gr64f-GAL4/UAS-IR76b;IR76b2/IR762	33.33	100	66.66	100
w1118	0	33.33	0	100		IR76b2/IR76b2	0	0	0	100		Gr64f-GAL4/+;IR76b2/IR76b2	66.66	33.33	33.33	100		UAS-IR76b/+;IR76b2/IR76b2	0	0	0	100		Gr64f-GAL4/UAS-IR76b;IR76b2/IR762	66.66	33.33	66.66	100
w1118	33.33	100	100	100		IR76b2/IR76b2	0	0	33.33	100		Gr64f-GAL4/+;IR76b2/IR76b2	0	0	0	100		UAS-IR76b/+;IR76b2/IR76b2	33.33	66.66	0	100		Gr64f-GAL4/UAS-IR76b;IR76b2/IR762	100	66.66	66.66	100
w1118	66.66	66.66	100	33.33		IR76b2/IR76b2	33.33	0	0	100		Gr64f-GAL4/+;IR76b2/IR76b2	0	0	0	100		UAS-IR76b/+;IR76b2/IR76b2	66.66	0	0	100		Gr64f-GAL4/UAS-IR76b;IR76b2/IR762	0	0	66.66	66.66
w1118	33.33	66.66	66.66	100		IR76b2/IR76b2	0	0	0	0		Gr64f-GAL4/+;IR76b2/IR76b2	0	0	0	100		UAS-IR76b/+;IR76b2/IR76b2	0	0	0	100		Gr64f-GAL4/UAS-IR76b;IR76b2/IR762	100	33.33	33.33	100
w1118	33.33	66.66	66.66	33.33		IR76b2/IR76b2	33.33	33.33	0	100		Gr64f-GAL4/+;IR76b2/IR76b2	33.33	0	0	100		UAS-IR76b/+;IR76b2/IR76b2	0	0	0	100		Gr64f-GAL4/UAS-IR76b;IR76b2/IR762	33.33	33.33	0	66.66
w1118	66.66	33.33	33.33	100		IR76b2/IR76b2	33.33	0	0	100		Gr64f-GAL4/+;IR76b2/IR76b2	0	0	0	100		UAS-IR76b/+;IR76b2/IR76b2	0	0	0	100		Gr64f-GAL4/UAS-IR76b;IR76b2/IR762	0	33.33	66.66	100
w1118	66.66	33.33	0	100								Gr64f-GAL4/+;IR76b2/IR76b2	0	0	0	100		UAS-IR76b/+;IR76b2/IR76b2	0	66.66	33.33	100		Gr64f-GAL4/UAS-IR76b;IR76b2/IR762	100	100	33.33	100
w1118	33.33	0	0	100								Gr64f-GAL4/+;IR76b2/IR76b2	33.33	0	33.33	66.66		UAS-IR76b/+;IR76b2/IR76b2	0	0	33.33	100		Gr64f-GAL4/UAS-IR76b;IR76b2/IR762	100	0	33.33	100
w1118	100	100	100	33.33														UAS-IR76b/+;IR76b2/IR76b2	33.33	0	0	100		Gr64f-GAL4/UAS-IR76b;IR76b2/IR762	100	66.66	33.33	100
w1118	66.66	66.66	33.33	100														UAS-IR76b/+;IR76b2/IR76b2	0	0	0	100		Gr64f-GAL4/UAS-IR76b;IR76b2/IR762	0	33.33	0	100
w1118	0	100	33.33	33.33														UAS-IR76b/+;IR76b2/IR76b2	66.66	33.33	0	100		Gr64f-GAL4/UAS-IR76b;IR76b2/IR762	66.66	66.66	66.66	100
w1118	33.33	33.33	0	100														UAS-IR76b/+;IR76b2/IR76b2	0	0	0	66.66		Gr64f-GAL4/UAS-IR76b;IR76b2/IR762	33.33	66.66	0	100
w1118	100	100	33.33	100														UAS-IR76b/+;IR76b2/IR76b2	33.33	0	0	66.66		Gr64f-GAL4/UAS-IR76b;IR76b2/IR762	33.33	0	66.66	33.33
w1118	100	66.66	66.66	66.66														UAS-IR76b/+;IR76b2/IR76b2	66.66	33.33	33.33	66.66		Gr64f-GAL4/UAS-IR76b;IR76b2/IR762	0	33.33	66.66	100
w1118	0	66.66	66.66	100																				Gr64f-GAL4/UAS-IR76b;IR76b2/IR762	66.66	66.66	33.33	100
w1118	66.66	0	0	33.33																				Gr64f-GAL4/UAS-IR76b;IR76b2/IR762	0	0	66.66	100
w1118	66.66	0	100	66.66																				Gr64f-GAL4/UAS-IR76b;IR76b2/IR762	100	66.66	0	100
w1118	66.66	100	33.33	0
w1118	0	66.66	66.66	66.66
w1118	66.66	100	0	100
w1118	100	0	33.33	66.66
w1118	33.33	100	66.66	66.66
w1118	33.33	100	33.33	66.66
w1118	100	66.66	0	100
w1118	33.33	66.66	0	100
w1118	33.33	0	0	100
w1118	66.66	100	100	100
