# Supplementary material for: Molecular basis of fatty acid taste in Drosophila
Source: eLife journal article supplement (doi:10.7554/elife.30115), 2017-12-12
Supplement: supp [file elife-30115-supp-v1.zip › elife_poa_e30115_Figure_4_figure_supplement_1_source_data_1.xlsx]

## Sheet: (B)
Figure 4-figure supplement 1-Source Data 1. (B) Ca2+ responses of sweet GRNs associated with 5b, 5s or 5b sensilla to fatty acids
5b-0.6% Hexanoic acid	5b-0.2% Octanoic acid	5b-0.2% Linoleic acid	5b-10mM Sucrose	5b-0.2% Ethanol (carrier)	5s-0.6% Hexanoic acid	5s-0.2% Octanoic acid	5s-0.2% Linoleic acid	5s-10mM Sucrose	5s-0.2% Ethanol (carrier)	5v-0.6% Hexanoic acid	5v-0.2% Octanoic acid	5v-0.2% Linoleic acid	5v-10mM Sucrose	5v-0.2% Ethanol (carrier)
57.69	5.91	0.95	64.14	3.77	40.07	16.04	10.02	66.55	1.51	1.77	9.86	43.96	248.97	1.08
29.19	10.4	1.03	286.21	10.45	31.7	15.23	6.71	266.9	2.23	6.91	7.34	12.35	42.05	3.18
76.73	27.67	4.41	144.89	1.75	58.13	9.8	1.53	161.7	0.64	5.23	13.47	3.71	359.81	2.76
207.65	88.2	0.41	259.19	6.31	65.23	13.8	49.03	77.61	4.23	3.34	9.1	4.16	169.28	1.7
120.22	108.85	2.99	39.06	2.86	29.6	6.06	0.33	96.39	17.51	2.21	17.51	5.32	166.82	2.65
20.41	151.6	12	47.38	3.61	15.18	126.78	17.89	82.91	6.2	1.11	10.36	0.58	34.65	2.98
106.95	5.34	3.82	125.1	4.68	21.37	96.66	9.22	17.78	3.33	1.15	2.95	33.11	228.96	8.2
67.79	0.01	2.83	98.44	2.11	27.93	74.14	2.01	58.8	6.7	2.54	0.41	13.2	545.33	1.38
222.73	56.58	6.3	133.12	0.75	88.94	3.44	6.51	212.05	3.21	4.81	2.19	13.17	358.56	0.81
38.81	9.97	6.13	38.11	19.88	142.42	0.13	12.72	208.08	8.04	3.53	2.72	6.06	484.14	0.16
49.75	232.35	2.71	16.87	9.3	100.44	7.07	2.99	297.48	4.57	2.98	18.66	4.3	86.05	16.31
54.5	37.92	17.16	12.58	2.86	14.39	17.97	1.39	98.67	3.09	3.26	3.26	7.18	45.27	3.47
17.82	35.16	7.63	34.03	6.61	79.66	112.71	17.07	29.81	6.77	-0.09	5.04	14.61	45.74	3.96
49.47	44.37	11.46	10.43		58.06	72.37	16.47	14.11		-3.66	0.1	19.8	99.16	6.65
77.93	61.38	2.53	28.67		15.96	22.13	19.87	138		10.15	0.88	14.15	98.02
193.6	19.66	20.95	21.49		36.85	24.93	21.3	33.91		0.25	6.22	9.09	248.54
80.7	3.29	15.24	49.43		113.15	5.82	3.17	64.86		3.39	1.75		300.88
116.49	69.27	12.5	123.67		105.77	23.43	22.82	213.83		2.58	5.94		383.79
23.18	90.79	49.46	99.71		46.68	9.74	26.19	98.64			17.94		300.86
45.97	54.78		118.64		152.96	29.39		160.83			6.76		228.71
105.38	197.72		136.18		59.3	30.64		128.91			7.92		530.9
142.94	106.4		16.9		71.86	30.47		214.05			32.2		324.21
29.59	123.98		46.27		163.72	90.74		12.6			0.12		18.96
8.8	102.39		82.54		18.35	73.01		44.66			0.89		155.95
83.21			11.85		36.88	86.29		179.15					202.49
			20.61		26.15	21.4		12.34					29.55
								35.71					42.64
