# Supplementary material for: Molecular basis of fatty acid taste in Drosophila
Source: eLife journal article supplement (doi:10.7554/elife.30115), 2017-12-12
Supplement: supp [file elife-30115-supp-v1.zip › elife_poa_e30115_Figure_4_source_data_1.xlsx]

## Sheet: Figure 4(C)
Figure 4-Source Data 1.
(C) Ca2+ responses of sweet GRNs associated with 5b, 5s or 5v sensilla to fatty acids
5b-0.6% Hexanoic acid	5b-0.2% Octanoic acid	5b-0.2% Linoleic acid	5b-10mM Sucrose	5b-0.2% Ethanol (carrier)	5s-0.6% Hexanoic acid	5s-0.2% Octanoic acid	5s-0.2% Linoleic acid	5s-10mM Sucrose	5s-0.2% Ethanol (carrier)	5v-0.6% Hexanoic acid	5v-0.2% Octanoic acid	5v-0.2% Linoleic acid	5v-10mM Sucrose	5v-0.2% Ethanol (carrier)
42.56	24.48	5.86	62.37	19.32	12.1	3.07	12.64	50.35	18.62	3.73	23.36	13.45	460.5	10.52
67.49	53.06	21.64	104.3	-1.06	63.66	14.59	12.05	55.64	1.89	55.6	0.76	22.86	24.32	11.36
45.17	44.17	12	47.1	11.42	7.73	-1.22	2.66	132.74	2.72	-27.83	39.98	12.04	171.61	5.21
10.8	19.64	8.48	11.33	2.78	8.55	12.74	9.85	46.67	1.58	11.9	0.62	6.39	290.73	2.43
174.59	32.15	38.58	27.87	-3.65	4.72	4.54	64.6	87.97	-0.77	2.59	16.44	26.77	401.57	-1.34
116.9	4.17	30.58	103.64	33.08	49.65	3.78	21.79	35.85	0.74	18.45	2.15	53.03	20.32	0.65
21.11	35.6	10.15	59.55	0.85	-1.75	71.69	19.85	35.21	10.26	-0.61	69.2	47.03	65.51	1.74
5.21	32.07	9.48	11.89	8.02	133.9	61	10.7	124.86	2.25	162.95	7.23	15.37	307.69	2.91
302.75	7.49	26.61	92.04	1.01	40.96	8.1	12.43	121.8	0.51	5.36	5.21	31.42	134.63	1.63
18.01	6.13	2.48	19.35	24.95	34.59	-7.21	3.23	138.21	4.21	16.62	-6.36	7.23	154.9	22.9
11.96	18.39	8.56	15.33	-2.74	171.51	2.28	2.94	171.3	8.97	125.78	0.82	3.3	455.63	5.04
58.47	3.75	10.84	125.77	-2.83	42.35	0.27	4.67	185.7	-1.99	46.115	-0.65	3.22	394.6	4.53
64.88	9.48	4.92	214.95	15.25	3.26	0.28	23.05	139.99	2.21	-1.95	3.31	0.68	143.78	5.27
77.06	69.32	11.29	38.36	5.91	-0.9	47.61	6.55	86.84	2.18	11.4	-0.53	15.17	65.9	5.75
20.32	102.96	16.08	26.14	1.36	57.49	107.77	6.85	70.72	0.25	69.82	1.48	4.76	285.92	-0.89
38.03	14.08	14.08	20.1	-0.15	18.23	3.02	51.15	102.55	5.17	-3.41	7.53	10.43	138.02	4.21
44.22	4.54	5.01	14.4	2.16	11.82	1.49	2.32	80.08	1.16	-1.63	-1.81	1.52	157	-3.92
138.2	147.11	17.58	17.09	2.95	1.82	6.43	16.58	92.67	-3.71	-2.29	4.3	26.71	193.6	-6.05
18.98	46.93	19.32	105.4	8.88	46.22	22.55	0.32	367.14	18.9	77.97	22.43	2.56	116.01	25.3
76.15	288.17	27.95	25.16	3.88	28.15	14.86	13.59	75.17	2.39	-0.55	34.74	1.84	271.78	2.2
108.94	8.65	9.02	89.43	-2.27	76.89	68.59	11.63	12.26	1.98	0.25	3.01	14.98	46.96	3.41
25.79	115.32	4.2	81.11	9.76	20.44	173.06	20.31	110.2	-0.4	1.3	14.31	13.77	298.08	-0.05
1.15	35	11.99	67.57	-3.5	19.86	6.87	2.99	40.05	2.4	-0.65	15.22	4.77	132.33	8.29
70.76	14.24		17.59	-1.57	9.72	61.72	17.95	28.29	9.32	13.39	-0.47	9.82	53.51	14.08
37.88	74.91		86.37	6.93	43.67	107.65	1.41	138.26	3.15	16.85	3.14	11.01	349.43	0.62
14.52	49.82		53.64	0.59	8.33	32.29		209.3	-1.49	-1.33	20.54		280.29	-1.82
	110.47		17.96	-64.56	66.87	32.99		145.74	3.05	104.69	-2.11		340.37	2.53
			59.7	-1.63	119.87	24.33		186.83	-1.02	0.21	11.04		384.71	-0.23
			34.56	-3.14	27.63	155.32		185.12	-1.45	3.16	2.26		288.13	-1.58
			50.14	-0.76	36.75			15.32	7.31	-2.27			25.14	8.96
			144.21	2.21	13.83			147.62	4.31	3.94			292.04	0.5
			92.62	2.52	11.87			112.6	0.77	0.89			142.4	-2.24
			33.66	0.09				33.6	-0.39				55.99	-1.11
			27.17	5.43				32.65	-86.91				60.57	-81.4
			109.43	-1.55				155.11	0.79				350.31	-0.7
			78.9	-2.36				112.7	-0.06				313.41	7.36
			146.27	1.19				171.2	11.55				188.65	-2.39
			78.25	5.54				218.09	10.49				239.95	-3.98
			32.1	1.28				240.08	-1.32				295.9	4.79
			10.47					200.93	-0.97				293.25	9.95
			97.62					90.85	-0.93				145.87	0.47
			46.36					56.1	-2.55				51.87	34.46
			64.8					86.01	-0.81				109.83	0.9
			12.76					184.17	-1.42				300.04	0.58
			53.37					210.18	6.25				299.61	4.17
			78.5					93.12	1.23				54.98	1.42
			21.65					20.16	-1.31				25.26	0.02
			75.61					44.01	-1.29				47.92	0.42
			30.48					70.74					186.23
								57.76					137.04
								105.41					205.55
								23.14					43.86
								107.29					193.87
								163.23					18.63
								16.07					38.54
								101.97					264.26
								11.93					14.8

## Sheet: Figure 4(D)
Figure 4-Source Data 2.
(D) Ca2+ responses of sweet GRNs associated with 5b, 5s or 5v sensilla from IR25a mutant flies to fatty acids.
5b-Control-0.6% Hexanoic acid	5b-Control-0.2% Octanoic acid	5b-Control-0.2% Linoleic acid	5b-Control-10 mM Sucrose	5b-IR25a2-0.6% Hexanoic acid	5b-IR25a2-0.2% Octanoic acid	5b-IR25a2-0.2% Linoleic acid	5b-IR25a2-10 mM Sucrose	5b-Rescue-0.6% Hexanoic acid	5b-Rescue-0.2% Octanoic acid	5b-Rescue-0.2% Linoleic acid	5b-Rescue-10 mM Sucrose	5s-Control-0.6% Hexanoic acid	5s-Control-0.2% Octanoic acid	5s-Control-0.2% Linoleic acid	5s-Control-10 mM Sucrose	5s-IR25a2-0.6% Hexanoic acid	5s-IR25a2-0.2% Octanoic acid	5s-IR25a2-0.2% Linoleic acid	5s-IR25a2-10 mM Sucrose	5s-Rescue-0.6% Hexanoic acid	5s-Rescue-0.2% Octanoic acid	5s-Rescue-0.2% Linoleic acid	5s-Rescue-10 mM Sucrose	5v-Control-0.6% Hexanoic acid	5v-Control-0.2% Octanoic acid	5v-Control-0.2% Linoleic acid	5v-Control-10 mM Sucrose	5v-IR25a2-0.6% Hexanoic acid	5v-IR25a2-0.2% Octanoic acid	5v-IR25a2-0.2% Linoleic acid	5v-IR25a2-10 mM Sucrose	5v-Rescue-0.6% Hexanoic acid	5v-Rescue-0.2% Octanoic acid	5v-Rescue-0.2% Linoleic acid	5v-Rescue-10 mM Sucrose
42.56	24.48	5.86	62.37	2.18	8.33	4.78	12.27	39.34	16.84	0.55	90.38	12.1	3.07	12.64	50.35	-0.35	1.65	8.35	246.68	9.01	26.09	16.03	19.05	3.73	23.36	13.45	460.5	-0.74	0.53	2.97	330.28	1.45	0.94	48.46	48.72
67.49	53.06	21.64	104.3	1.06	10.98	19.14	13.66	18.23	35.29	2.49	20.35	63.66	14.59	12.05	55.64	-0.67	-0.32	9.33	142.02	25.32	18.5	4.6	93.09	55.6	0.76	22.86	24.32	3.49	-0.04	7.92	41.87	0.63	32.44	32.78	306.26
45.17	44.17	12	47.1	1.66	5.88	7.26	31.67	12.05	8.07	3.62	19.39	7.73	-1.22	2.66	132.74	-4.27	-4.25	11.12	47.88	37.79	48.75	9.58	61.5	-27.83	39.98	12.04	171.61	19.25	0.07	2.1	112.38	28.83	-2.18	2.85	108.03
10.8	19.64	8.48	11.33	24.35	1.13	-0.25	18.69	39.47	11.71	0.74	57.81	8.55	12.74	9.85	46.67	2.55	6.26	5.26	65.82	11.87	7.19	4.54	129.56	11.9	0.62	6.39	290.73	0.17	1.9	6.3	271.54	3.79	-0.57	8.02	295.24
174.59	32.15	38.58	27.87	-6.25	-0.14	4.89	14.96	61.12	39.35	6.2	90.02	4.72	4.54	64.6	87.97	-10.78	1.14	-0.21	44.75	-0.16	10.61	29.7	71.26	2.59	16.44	26.77	401.57	-9.55	6.54	13.56	90.56	0.51	8.51	11.26	246.6
116.9	4.17	30.58	103.64	-0.98	5.77	13.01	54.63	29.2	72.7	-0.9	21.93	49.65	3.78	21.79	35.85	14.23	-0.35	-1.24	127.45	25.27	30.9	1.58	243.08	18.45	2.15	53.03	20.32	15.5	-0.01	1.52	87.72	-1.67	0	3.82	351
21.11	35.6	10.15	59.55	20.35	15.64	8.59	16.11	66.25	6.88	7.78	83.89	-1.75	71.69	19.85	35.21	-2.35	17.02	13.1	24.59	12.93	45.94	8.24	107.19	-0.61	69.2	47.03	65.51	-4.51	1.02	8.28	36.49	0.68	14.04	0.17	290.3
5.21	32.07	9.48	11.89	5.06	-2.72	2.82	63.15	85.67	12.3	6.6	10.53	133.9	61	10.7	124.86	2.74	0.22	5.9	43.68	124.56	4.87	42.18	130.22	162.95	7.23	15.37	307.69	-1.44	5.84	3.69	75.04	97.9	-0.27	1.21	170.26
302.75	7.49	26.61	92.04	7.05	1.94	0.7	160.63	12.86	9.38	9.47	19.77	40.96	8.1	12.43	121.8	-0.72	3.2	10.36	42.5	53.14	8.84	7.99	76.89	5.36	5.21	31.42	134.63	0.34	3.39	5.09	82.46	11.84	6.85	7.58	194.24
18.01	6.13	2.48	19.35	2.1	3.71	-0.72	67.21	61.67	6.28	5	147.77	34.59	-7.21	3.23	138.21	2.29	11.97	1.8	60.58	25.88	9.92	3.29	61.58	16.62	-6.36	7.23	154.9	1.84	4.73	11.82	220.94	2.52	10.24	2.64	101.51
11.96	18.39	8.56	15.33	7.25	13.02	0.42	68.19	19.21		42.19	22.32	171.51	2.28	2.94	171.3	-1.82	0.57	10.7	81.93	16.44	66.43	2.74	17.64	125.78	0.82	3.3	455.63	-10.71	10.84	1.41	303.19	13.77	3.46	6.7	32.54
58.47	3.75	10.84	125.77	3.45	6.07	8.48	28.82	242.64	46.95	11.46	207.89	42.35	0.27	4.67	185.7	9.23	6.52	8.16	141.44	31.46	68.58	6.92	75.78	46.115	-0.65	3.22	394.6	-12.81	-4.42	18.54	40.28	14.73	12.6	16.42	77.57
64.88	9.48	4.92	214.95	4.06	-0.01	-2.21	62.53	90.67	20.21	22.71	32.55	3.26	0.28	23.05	139.99	4.03	3.59	-1.78	44.23	12.01	7.96	12.46	76.75	-1.95	3.31	0.68	143.78	-0.89	2.26	12.26	20.47	102.16	12.85	18.92	18.33
77.06	69.32	11.29	38.36	4.16	-4.17	43.77	108.29	35.42	232.6	3.33	137.35	-0.9	47.61	6.55	86.84	5.79	0.94	0.05	28.24	48.55	6.36	6.11	162.75	11.4	-0.53	15.17	65.9	-3.16	-0.63	0.27	22.68	9.08	12.92	5.06	55.38
20.32	102.96	16.08	26.14	-1.6	3.12	0.84	315.61		21.33	27.85	119.65	57.49	107.77	6.85	70.72	0	-0.15	25.89	94.59	37.06	15.64	6.38	14.13	69.82	1.48	4.76	285.92	-6.48	-1.55	35.95	128.75	22	1.35	3.61	96.15
38.03	14.08	14.08	20.1	5.09	-0.61	59.21	23.36		106.73	25.49	14.78	18.23	3.02	51.15	102.55	0.71	0.56	38	35.33	132.58	12.33	3.64	354.65	-3.41	7.53	10.43	138.02	-3.1	1.06	18.73	1098.51	6.83	30.51	21.11	285.01
44.22	4.54	5.01	14.4	-0.27	-2.16	17.85	27.17	78.69	12.44	66.38	14.04	11.82	1.49	2.32	80.08	0.33	1.05	5.48	98.02	46.81	27.04	16.43	28.81	-1.63	-1.81	1.52	157	-11.9		10.01	316.77	3.18	14.21	7.05	23.78
138.2	147.11	17.58	17.09	5.62		2.1	76.16	62.96	108.28	5.06	42.53	1.82	6.43	16.58	92.67	0.6	-0.46	10.57	45.25	54.73	13.66	-2.13	128.46	-2.29	4.3	26.71	193.6	-1.82		16.01	53.01	9.13	23.11	37.56	40.45
18.98	46.93	19.32	105.4	6.92			124.4		30.76	30.04	184.44	46.22	22.55	0.32	367.14	1.32	0.13	13	36.6	22.93	94.08	41.81	36.21	77.97	22.43	2.56	116.01	2.47			124.28	5.31	64.32	26.59	146.48
76.15	288.17	27.95	25.16				92.61	95.66	46.81	17.58	22.02	28.15	14.86	13.59	75.17	-0.13		4.01	300.77	11.86	11.3	14.23	14.53	-0.55	34.74	1.84	271.78	-4.2			161.97	1.88	15.75	0.95	59.16
108.94	8.65	9.02	89.43				87.27	56.46	90.68	22.45	29.49	76.89	68.59	11.63	12.26	7.29		10.61	24.35	61.02	30.6	11.89	228.28	0.25	3.01	14.98	46.96	3.57			88.52	6.67	7.5	2.55	300.69
25.79	115.32	4.2	81.11				183.7	42.72	10.17	2.8	40.83	20.44	173.06	20.31	110.2	8.62		-0.04	90.68	35.4	13.15	4.06	45.97	1.3	14.31	13.77	298.08	1.14			267.16	1.03	3.78	5.67	81.78
1.15	35	11.99	67.57				89.47	28.17	27.22	9.41	46.49	19.86	6.87	2.99	40.05				253.76	9.19	13.82	4.25	76.56	-0.65	15.22	4.77	132.33	2.09			249.39	2.24	21.03	10.82	79.13
70.76	14.24		17.59				75.83	15.59	22.98	17.42	73.23	9.72	61.72	17.95	28.29				32.41	53.42	42.16	51.93	15.24	13.39	-0.47	9.82	53.51	-0.35			161.15	-2.88	63.79	6.58	14.6
37.88	74.91		86.37				81.44	32.02			120.59	43.67	107.65	1.41	138.26				149.24	14.48	48.6	11.32	24.04	16.85	3.14	11.01	349.43	0.47			145.76	5.71		2.43	94.89
14.52	49.82		53.64				137.14	55.94			112.14	8.33	32.29		209.3				41.96	58.71	42.67	2.98	164.72	-1.33	20.54		280.29	3.54			251.17	9.82		19.17	254.39
	110.47		17.96				132.9	27.27			10.52	66.87	32.99		145.74				300.17	14.49	46.96	3.13	180.83	104.69	-2.11		340.37				186.55	10.01			215.83
			59.7				58.68	15.76			147.31	119.87	24.33		186.83				76.48	51.61	13.36	2.61	31.41	0.21	11.04		384.71				233.35				65.78
			34.56				73.46				107.04	27.63	155.32		185.12				128.92	12.12	23.31	12.44	129.2	3.16	2.26		288.13				196.2				379.43
			50.14				27.51				54.76	36.75			15.32				26.02	23.62	56.31	28.87	76.58	-2.27			25.14				311.62				219.96
			144.21				79.17				68.21	13.83			147.62				284.02	18.23	37.08		98.15	3.94			292.04				51.28				190.33
			92.62				156.16				26.64	11.87			112.6				136.6	24.88	70.14		162.31	0.89			142.4				261.18				192.85
			33.66				34.44				27.08				33.6				151	14.3			148.3				55.99				356.43				240.03
			27.17				39.65				25.76				32.65				302.37	15.29			71.04				60.57				189.17				100.84
			109.43				35.15				24.24				155.11				146.1				122.63				350.31				208.04				209
			78.9								12.8				112.7				107.02				193.75				313.41				300.42				293.33
			146.27								75.83				171.2				111.19				120.31				188.65				431.69				319.86
			78.25								112.65				218.09				129.35				61				239.95				30.86				306.54
			32.1								96				240.08				290.48				14.87				295.9				52.54				32.12
			10.47								138.4				200.93				30.83				190.58				293.25				40.13				91.27
			97.62								72.05				90.85				37.42				150.25				145.87				100.48				283.68
			46.36								42.35				56.1				158.48				26.24				51.87								222.5
			64.8								51.44				86.01				103.94				31.34				109.83								348.37
			12.76								39.81				184.17				33.88				23.2				300.04								205.1
			53.37								74.69				210.18								50.15				299.61								250.05
			78.5								17.59				93.12								122.57				54.98								201.78
			21.65								10.95				20.16								224.76				25.26								383.39
			75.61												44.01								139.24				47.92								16.85
			30.48												70.74								248.79				186.23
															57.76								138.52				137.04
															105.41								97.66				205.55
															23.14								86.55				43.86
															107.29								74.45				193.87
															163.23								100.96				18.63
															16.07								87.65				38.54
															101.97								71.88				264.26
															11.93								146.68				14.8
																							173.98
																							21.94

## Sheet: Figure 4(E)
Figure 4-Source Data 2.
(E) Ca2+ responses of sweet GRNs associated with 5b, 5s or 5v sensilla from IR76b mutant flies to fatty acids.
5b-Control-0.6% Hexanoic acid	5b-Control-0.2% Octanoic acid	5b-Control-0.2% Linoleic acid	5b-Control-10 mM Sucrose	5b-IR76b-0.6% Hexanoic acid	5b-IR76b-0.2% Octanoic acid	5b-IR76b-0.2% Linoleic acid	5b-IR76b-10 mM Sucrose	5b-Rescue-0.6% Hexanoic acid	5b-Rescue-0.2% Octanoic acid	5b-Rescue-0.2% Linoleic acid	5b-Rescue-10 mM Sucrose	5s-Control-0.6% Hexanoic acid	5s-Control-0.2% Octanoic acid	5s-Control-0.2% Linoleic acid	5s-Control-10 mM Sucrose	5s-IR76b-0.6% Hexanoic acid	5s-IR76b-0.2% Octanoic acid	5s-IR76b-0.2% Linoleic acid	5s-IR76b-10 mM Sucrose	5s-Rescue-0.6% Hexanoic acid	5s-Rescue-0.2% Octanoic acid	5s-Rescue-0.2% Linoleic acid	5s-Rescue-10 mM Sucrose	5v-Control-0.6% Hexanoic acid	5v-Control-0.2% Octanoic acid	5v-Control-0.2% Linoleic acid	5v-Control-10 mM Sucrose	5v-IR76b-0.6% Hexanoic acid	5v-IR76b-0.2% Octanoic acid	5v-IR76b-0.2% Linoleic acid	5v-IR76b-10 mM Sucrose	5v-Rescue-0.6% Hexanoic acid	5v-Rescue-0.2% Octanoic acid	5v-Rescue-0.2% Linoleic acid	5v-Rescue-10 mM Sucrose
57.69	5.91	0.95	64.14	5.82	0.16	3.06	22.22	19.17	33.54	5.99	47.95	40.07	16.04	10.02	66.55	14.79	-0.34	-0.78	31.2	85.32	30.5	8.03	41.98	1.77	9.86	43.96	248.97	37.73	-0.74	0.29	23.14	8.03	25.5	0.45	275.83
29.19	10.4	1.03	286.21	20.76	2.96	1.94	60.08	39.94	24.53	2	22.19	31.7	15.23	6.71	266.9	18.27	0.41	2.86	114.31	58.3	41.02	0	54.75	6.91	7.34	12.35	42.05	35.77	8.62	4.12	215.03	28.67	19.65	3.24	114.62
76.73	27.67	4.41	144.89	43.3	0.51	-0.43	26.25	19.47	24.63	0.36	43.61	58.13	9.8	1.53	161.7	30.4	4.06	-0.16	318.21	162.72	49.92	0.68	134.95	5.23	13.47	3.71	359.81	40.13	0.28	0.32	211.31	1.34	51.76	1.43	334.17
207.65	88.2	0.41	259.19	13.2	17.45	6.79	84.26	63.52	14	0.48	35.76	65.23	13.8	49.03	77.61	68.83	4.63	4.28	146.08	43.99	22.91	1.12	122.21	3.34	9.1	4.16	169.28	75.38	61.26	3.51	33.61	19.61	15.63	1.19	87.77
120.22	108.85	2.99	39.06	41.62	7.63	24.56	34.65	2.39	2.01	27.52	147.53	29.6	6.06	0.33	96.39	0.78	10.79	1.6	117.96	4.54	2.23	56.36	195.88	2.21	17.51	5.32	166.82	39.93	23.33	3.02	141.23	36.36	1.17	1.83	297.34
20.41	151.6	12	47.38	21.84	20.44	14.93	51.65	98.11	14.92	27.89	28.01	15.18	126.78	17.89	82.91	3.89	7.15	3.66	142.67	70.22	4.79	43.52	79.35	1.11	10.36	0.58	34.65	-1.35	-1.13	3.06	141.55	3.04	13.65	39.07	210.37
106.95	5.34	3.82	125.1	-0.87	0.28	4.98	40.68	83.02	35.11	1.49	313.49	21.37	96.66	9.22	17.78	1.77	37.32	2.5	41.09	22.83	63.32	1.86	273.61	1.15	2.95	33.11	228.96	13.66	4.92	-1.38	223.75	9.12	7.54	19.56	34.4
67.79	0.01	2.83	98.44	7.65	13.7	4.71	60.66	108.32	5.14	10.13	56.44	27.93	74.14	2.01	58.8	-2.29	9.85	0.84	152.83	50.35	88.61	5.67	29.34	2.54	0.41	13.2	545.33	4.1	4.07	-0.91	307.5	5.87	3.66	4.54	84.59
222.73	56.58	6.3	133.12	22.05	-2.33	3.33	168.52	8.24	76.67	0.57	59.93	88.94	3.44	6.51	212.05	5.29	58.62	5.04	145.45	111.82	82.11	0.9	51.83	4.81	2.19	13.17	358.56	-1.61	20.98	7.61	137.12	18.94	3.53	3.6	135.26
38.81	9.97	6.13	38.11	2.5	4.45	12.05	13.47	50.54	217.08	11.41	68.19	142.42	0.13	12.72	208.08	27.53	13.24	0.7	40.51	46.65	23.93	5.96	76.85	3.53	2.72	6.06	484.14	5.41	7.42	-0.25	250.13	23.08	23.24	8.31	47.69
49.75	232.35	2.71	16.87	3.17	0.76	-0.65	43.83	108.39	7.49	0.8	48.19	100.44	7.07	2.99	297.48	3.39	0.03	-0.4	70.82	77.75	145.7	9.6	38.55	2.98	18.66	4.3	86.05	16.11	37.83	1.55	42.58	6.46	6.37	1.87	183.9
54.5	37.92	17.16	12.58	-6.87	7.56	2.67	56.87	144.75	182.47	18.07	15.68	14.39	17.97	1.39	98.67	8.22	41.96	0.3	184.53	86.87	17.01	1.41	234.02	3.26	3.26	7.18	45.27	3.26	79.4	0.06	133.71	81	6.59	2.96	56.01
17.82	35.16	7.63	34.03	22.34	0	-0.69	28.98	78.57	124.2	1.24	64.68	79.66	112.71	17.07	29.81	-3.27	0.36	5.31	67.3	140.44	16.59	1.69	82.67	-0.09	5.04	14.61	45.74	-0.09	15.77	1.43	217.96	15.42	48.7	1.21	432.22
49.47	44.37	11.46	10.43	4.05	-0.33	5.07	30.55	80.36	25.84	6.22	72.75	58.06	72.37	16.47	14.11	12.6	0.39	0.36	236.51	57.32	162.27	1.83	61.28	-3.66	0.1	19.8	99.16	-3.66	-1.22	2.24	125.98	7.18	8.86	0.63	223.57
77.93	61.38	2.53	28.67	8.51	13.03	3.65	27.25	240.6	1.76	0.63	194.48	15.96	22.13	19.87	138	-0.73	-6.31	0.81	33.4	41.75	26.09	2.58	193.01	10.15	0.88	14.15	98.02	10.15	-1.28	1.28	293.11	1.01	2.58	2.52	230.8
193.6	19.66	20.95	21.49	14.53	-0.31	2.67	31.15	11.89	10.5	26.67	79.19	36.85	24.93	21.3	33.91	12.16		0.79	111.29	38.06	8.1	1.86	150.67	0.25	6.22	9.09	248.54	2.05	6.56	0.82	24.98	19.16	0.5	2.52	192.22
80.7	3.29	15.24	49.43	0.33	0.28	-0.03	218.8	8.67	12.46	67.6	36.12	113.15	5.82	3.17	64.86	80.19			264.46	135.41	6.87	6.22	114.62	3.39	1.75		300.88	-1.38	0.74		184.64	20.64	16.96	1.73	200.72
116.49	69.27	12.5	123.67	-3.08	-1.78	1.41	30.63	17.41	113.27	2.12	71.45	105.77	23.43	22.82	213.83	4.93			161.18	110.58	6.75	21.44	215.69	2.58	5.94		383.79	4.44	2.27		374.09	0.63	2.32	23.17	20.03
23.18	90.79	49.46	99.71	-2.2			97.26	53.19	46.82	14.87	138.81	46.68	9.74	26.19	98.64	1.95			166.64	3.7	2.94	0.44	47.39		17.94		300.86	6.43			177.71	26.56	47.56	45.08	346.06
45.97	54.78		118.64	12.39			367.02	166.36	22.96	31.65	31.59	152.96	29.39		160.83	8.84			106.33	23.5	66.4	14.6	88.52		6.76		228.71	92.17			281.66		15.51	1.71	104.85
105.38	197.72		136.18				70.69	10.63	90.91	30.75	33.51	59.3	30.64		128.91				311.35	26.48	83.53	12.46	208.83		7.92		530.9	4.66			82.53		5.74	8.67	488.62
142.94	106.4		16.9				161.71	6.5	52.14	8.1	136.86	71.86	30.47		214.05				183.75	8.7	11.4	7.86	154.32		32.2		324.21				198.41		24.81	9.56	199.48
29.59	123.98		46.27				234.17	69.27	38.77		17.18	163.72	90.74		12.6				50.32	76.94	200.9	4.73	66.85		0.12		18.96				304.16		0.01	8.88	90.1
8.8	102.39		82.54				182.92	16	18.26		28.89	18.35	73.01		44.66				72.13	24.31	16.67		49.29		0.89		155.95				339.34		4.13	1.25	32.92
83.21			11.85				22.26	56.59			159.86	36.88	86.29		179.15				116.39	69.13	15.46		41.43				202.49				26.64		6.34		163.35
			20.61				33.51				121.27	26.15	21.4		12.34				143.25	24.89			84.8				29.55				121.99				159.73
							271.84				25.1				35.71				171.6	55.77			262.26				42.64				232.86				123.21
							160.2												90.23				54.76								263.26				329.25
							132.88																72.07								385.82				75.42
							352.72																								166.02				230.44
							61.72
