# Supplementary material for: Molecular basis of fatty acid taste in Drosophila
Source: eLife journal article supplement (doi:10.7554/elife.30115), 2017-12-12
Supplement: supp [file elife-30115-supp-v1.zip › elife_poa_e30115_Figure_5_figure_supplement_1_source_data_1.xlsx]

## Sheet: (A)
Figure 5-figure supplement 1-Source Data 1
PER responses of flies with knockdown of IR genes in sweet GRNs (A) or IR mutants (B) to fatty acids.
Sample Name	1% Hexanoic acid	1% Octanoic acid	100 mM Sucrose
w1118	36.7	28.3	68.4
w1118	40	23.3	86.7
w1118	48.5	21.2	100
w1118	39.39	42.42	72.72
Gr64f>IR11aRNAi	18.5	22.2	85.2
Gr64f>IR21aRNAi	24.4	15.6	44.4
Gr64f>IR56bRNAi	25	19.4	63.9
Gr64f>IR94hRNAi	78.78	75.75	57.57
Gr64f>IR56dRNAi	8.3	8.3	75

## Sheet: (B)
Figure 5-figure supplement 1-Source Data 1
PER responses of flies with knockdown of IR genes in sweet GRNs (A) or IR mutants (B) to fatty acids.
Genotype	1% Hexanoic acid	1% Octanoic acid	1% Linoleic acid	100 mM Sucrose
w1118	39.39	39.39	42.42	57.57
w1118	40	36.66	33.33	80
w1118	45.45	42.42	42.42	57.57
w1118	50	43.33	63.33	70
w1118	41.66	33.33	33.33	55.55
w1118	33.33	27.27	42.42	54.54
w1118	15.15	27.27	21.21	60.6
w1118	39.39	42.42	36.36	72.72
w1118	33.33	25	35.11	50
w1118	39.39	39.39	42.42	57.57
Mi{ET1}IR52cMB04402	38.09	23.8	23.8	85.71
Mi{ET1}IR52cMB04402	22.22	22.22	0	88.88
Mi{ET1}IR52cMB04402	50	53.33	46.66	76.66
Mi{ET1}IR52cMB04402	38.88	55.55	55.55	80.55
Mi{ET1}IR52cMB04402	47.22	55.55	36.11	75
Mi{ET1}IR52cMB04402	66.66	66.66	57.57	72.72
Mi{ET1}IR56bMB09950	66.66	58.33	58.33	83.33
Mi{MIC}IR62aMI00895	61.11	44.44	5.55	72.22
Mi{MIC}IR62aMI00895	75.75	48.48	36.36	66.66
Mi{MIC}IR62aMI00895	20.83	16.66	16.66	20.83
