# Supplementary material for: Molecular basis of fatty acid taste in Drosophila
Source: eLife journal article supplement (doi:10.7554/elife.30115), 2017-12-12
Supplement: supp [file elife-30115-supp-v1.zip › elife_poa_e30115_Figure_5_source_data_1.xlsx]

## Sheet: Figure 5(A)
Figure 5-Source Data 1
(A) PER responses of flies with knock down of IR56d in sweet GRNs to fatty acids.
Sample Name	1% Hexanoic acid	1% Octanoic acid	1% Linoleic acid	100 mM Sucrose		Sample Name	1% Hexanoic acid	1% Octanoic acid	1% Linoleic acid	100 mM Sucrose		Sample Name	1% Hexanoic acid	1% Octanoic acid	1% Linoleic acid	100 mM Sucrose
Gr64f-GAL4 alone	0	0	0	0		UAS-TNT alone	33.33	33.33	66.66	66.66		Gr64f-GAL4/+;UAS-IR56dRNAi/+	0	0	0	0
Gr64f-GAL4 alone	0	0	33.33	33.33		UAS-TNT alone	0	0	0	66.66		Gr64f-GAL4/+;UAS-IR56dRNAi/+	0	0	0	0
Gr64f-GAL4 alone	0	0	0	0		UAS-TNT alone	33.33	66.66	0	66.66		Gr64f-GAL4/+;UAS-IR56dRNAi/+	0	0	0	33.33
Gr64f-GAL4 alone	33.33	0	0	0		UAS-TNT alone	66.66	100	33.33	0		Gr64f-GAL4/+;UAS-IR56dRNAi/+	0	0	0	0
Gr64f-GAL4 alone	0	66.66	33.33	100		UAS-TNT alone	0	33.33	0	33.33		Gr64f-GAL4/+;UAS-IR56dRNAi/+	33.33	0	0	100
Gr64f-GAL4 alone	66.66	66.66	66.66	100		UAS-TNT alone	0	0	0	33.33		Gr64f-GAL4/+;UAS-IR56dRNAi/+	33.33	0	0	33.33
Gr64f-GAL4 alone	33.33	33.33	0	100		UAS-TNT alone	33.33	0	0	100		Gr64f-GAL4/+;UAS-IR56dRNAi/+	0	0	0	33.33
Gr64f-GAL4 alone	33.33	66.66	33.33	0		UAS-TNT alone	66.66	0	66.66	100		Gr64f-GAL4/+;UAS-IR56dRNAi/+	0	0	0	66.66
Gr64f-GAL4 alone	0	33.33	0	33.33		UAS-TNT alone	0	0	0	0		Gr64f-GAL4/+;UAS-IR56dRNAi/+	0	33.33	0	100
Gr64f-GAL4 alone	33.33	0	33.33	0		UAS-TNT alone	0	0	0	33.33		Gr64f-GAL4/+;UAS-IR56dRNAi/+	0	0	0	66.66
Gr64f-GAL4 alone	66.66	0	0	66.66		UAS-TNT alone	0	0	0	0		Gr64f-GAL4/+;UAS-IR56dRNAi/+	0	0	0	66.66
Gr64f-GAL4 alone	33.33	0	33.33	0		UAS-TNT alone	33.33	100	66.66	100		Gr64f-GAL4/+;UAS-IR56dRNAi/+	0	33.33	0	33.33
Gr64f-GAL4 alone	66.66	66.66	0	0		UAS-TNT alone	33.33	0	0	66.66		Gr64f-GAL4/+;UAS-IR56dRNAi/+	0	33.33	0	66.66
Gr64f-GAL4 alone	0	33.33	0	66.66		UAS-TNT alone	0	0	33.33	66.66		Gr64f-GAL4/+;UAS-IR56dRNAi/+	0	0	33.33	33.33
Gr64f-GAL4 alone	33.33	0	33.33	0		UAS-TNT alone	33.33	0	0	33.33		Gr64f-GAL4/+;UAS-IR56dRNAi/+	0	0	0	0
Gr64f-GAL4 alone	0	33.33	0	100		UAS-TNT alone	0	33.33	0	0		Gr64f-GAL4/+;UAS-IR56dRNAi/+	0	0	0	0
Gr64f-GAL4 alone	0	33.33	0	33.33		UAS-TNT alone	33.33	0	33.33	0		Gr64f-GAL4/+;UAS-IR56dRNAi/+	0	0	33.33	33.33
Gr64f-GAL4 alone	0	0	0	0		UAS-TNT alone	33.33	66.66	33.33	33.33		Gr64f-GAL4/+;UAS-IR56dRNAi/+	0	0	33.33	33.33
Gr64f-GAL4 alone	0	0	0	33.33		UAS-TNT alone	33.33	66.66	0	0		Gr64f-GAL4/+;UAS-IR56dRNAi/+	0	0	0	100
Gr64f-GAL4 alone	0	0	0	66.66		UAS-TNT alone	0	33.33	0	0		Gr64f-GAL4/+;UAS-IR56dRNAi/+	33.33	0	0	33.33
Gr64f-GAL4 alone	0	0	0	0		UAS-TNT alone	0	0	33.33	66.66		Gr64f-GAL4/+;UAS-IR56dRNAi/+	33.33	0	0	100
Gr64f-GAL4 alone	0	0	0	33.33		UAS-TNT alone	0	0	66.66	0		Gr64f-GAL4/+;UAS-IR56dRNAi/+	0	0	0	100
Gr64f-GAL4 alone	66.66	100	0	100		UAS-TNT alone	33.33	0	0	33.33		Gr64f-GAL4/+;UAS-IR56dRNAi/+	0	0	0	66.66
Gr64f-GAL4 alone	33.33	100	0	100		UAS-TNT alone	0	33.33	0	0		Gr64f-GAL4/+;UAS-IR56dRNAi/+	33.33	0	0	0
Gr64f-GAL4 alone	33.33	66.66	0	100		UAS-TNT alone	0	0	0	100		Gr64f-GAL4/+;UAS-IR56dRNAi/+	0	0	0	0
Gr64f-GAL4 alone	100	66.66	100	100		UAS-TNT alone	0	0	0	33.33		Gr64f-GAL4/+;UAS-IR56dRNAi/+	33.33	0	0	100
Gr64f-GAL4 alone	0	0	0	66.66		UAS-TNT alone	0	0	33.33	0		Gr64f-GAL4/+;UAS-IR56dRNAi/+	0	0	0	33.33
Gr64f-GAL4 alone	66.66	100	0	0		UAS-TNT alone	0	0	0	33.33		Gr64f-GAL4/+;UAS-IR56dRNAi/+	0	0	0	0
Gr64f-GAL4 alone	0	0	0	0		UAS-TNT alone	33.33	0	0	100		Gr64f-GAL4/+;UAS-IR56dRNAi/+	0	0	0	33.33
Gr64f-GAL4 alone	0	66.66	0	66.66		UAS-TNT alone	0	33.33	100	66.66		Gr64f-GAL4/+;UAS-IR56dRNAi/+	0	0	0	66.66
Gr64f-GAL4 alone	66.66	66.66	33.33	100		UAS-TNT alone	100	0	0	66.66		Gr64f-GAL4/+;UAS-IR56dRNAi/+	0	0	0	33.33
Gr64f-GAL4 alone	33.33	0	66.66	100		UAS-TNT alone	100	33.33	0	33.33		Gr64f-GAL4/+;UAS-IR56dRNAi/+	0	0	0	33.33
Gr64f-GAL4 alone	0	0	0	33.33		UAS-TNT alone	0	0	0	33.33		Gr64f-GAL4/+;UAS-IR56dRNAi/+	0	0	0	66.66
Gr64f-GAL4 alone	0	0	0	100		UAS-TNT alone	0	0	0	100		Gr64f-GAL4/+;UAS-IR56dRNAi/+	33.33	0	0	100
Gr64f-GAL4 alone	0	33.33	0	100		UAS-TNT alone	0	0	0	66.66		Gr64f-GAL4/+;UAS-IR56dRNAi/+	0	0	0	100
Gr64f-GAL4 alone	33.33	0	0	66.66		UAS-TNT alone	66.66	0	0	66.66		Gr64f-GAL4/+;UAS-IR56dRNAi/+	0	0	0	100
Gr64f-GAL4 alone	0	0	100	66.66		UAS-TNT alone	0	33.33	0	0		Gr64f-GAL4/+;UAS-IR56dRNAi/+	0	0	0	100
Gr64f-GAL4 alone	0	0	33.33	33.33		UAS-TNT alone	33.33	0	0	33.33		Gr64f-GAL4/+;UAS-IR56dRNAi/+	33.33	33.33	0	66.66
Gr64f-GAL4 alone	33.33	66.66	0	100		UAS-TNT alone	33.33	33.33	0	66.66		Gr64f-GAL4/+;UAS-IR56dRNAi/+	33.33	0	0	66.66
Gr64f-GAL4 alone	0	0	0	0		UAS-TNT alone	0	0	33.33	0		Gr64f-GAL4/+;UAS-IR56dRNAi/+	0	33.33	0	33.33
Gr64f-GAL4 alone	0	0	66.66	0		UAS-TNT alone	0	33.33	66.66	0		Gr64f-GAL4/+;UAS-IR56dRNAi/+	0	0	0	100
Gr64f-GAL4 alone	100	100	100	100		UAS-TNT alone	66.66	33.33	0	33.33		Gr64f-GAL4/+;UAS-IR56dRNAi/+	0	0	0	0
Gr64f-GAL4 alone	0	0	0	100		UAS-TNT alone	0	33.33	66.66	66.66		Gr64f-GAL4/+;UAS-IR56dRNAi/+	0	0	0	100
Gr64f-GAL4 alone	0	33.33	0	100		UAS-TNT alone	33.33	0	0	100		Gr64f-GAL4/+;UAS-IR56dRNAi/+	0	0	0	66.66
Gr64f-GAL4 alone	0	0	0	0		UAS-TNT alone	0	0	0	0		Gr64f-GAL4/+;UAS-IR56dRNAi/+	0	0	0	0
Gr64f-GAL4 alone	33.33	33.33	0	100		UAS-TNT alone	0	0	0	33.33		Gr64f-GAL4/+;UAS-IR56dRNAi/+	0	0	0	100
Gr64f-GAL4 alone	66.66	0	100	66.66		UAS-TNT alone	0	0	0	100		Gr64f-GAL4/+;UAS-IR56dRNAi/+	0	33.33	33.33	66.66
Gr64f-GAL4 alone	33.33	100	33.33	0		UAS-TNT alone	0	0	0	33.33		Gr64f-GAL4/+;UAS-IR56dRNAi/+	66.66	0	0	66.66
Gr64f-GAL4 alone	0	0	0	0		UAS-TNT alone	0	0	0	0		Gr64f-GAL4/+;UAS-IR56dRNAi/+	0	0	0	66.66
						UAS-TNT alone	0	0	0	0		Gr64f-GAL4/+;UAS-IR56dRNAi/+	0	66.66	0	33.33
						UAS-TNT alone	0	0	0	100		Gr64f-GAL4/+;UAS-IR56dRNAi/+	0	0	0	66.66
						UAS-TNT alone	66.66	0	0	33.33		Gr64f-GAL4/+;UAS-IR56dRNAi/+	0	0	0	66.66
						UAS-TNT alone	66.66	33.33	33.33	66.66		Gr64f-GAL4/+;UAS-IR56dRNAi/+	0	0	0	33.33
						UAS-TNT alone	0	33.33	100	0		Gr64f-GAL4/+;UAS-IR56dRNAi/+	0	0	0	33.33
						UAS-TNT alone	0	0	66.66	0		Gr64f-GAL4/+;UAS-IR56dRNAi/+	0	33.33	0	100
						UAS-TNT alone	0	66.66	0	0		Gr64f-GAL4/+;UAS-IR56dRNAi/+	0	0	0	66.66
						UAS-TNT alone	0	0	0	0		Gr64f-GAL4/+;UAS-IR56dRNAi/+	0	0	0	33.33
						UAS-TNT alone	33.33	33.33	66.66	66.66
						UAS-TNT alone	33.33	33.33	0	33.33

## Sheet: Figure 5(B)
Figure 5-Source Data 1
(B and C) Ca2+ responses of sweet GRNs associated with 5b (B) or 5s (C) sensilla to fatty acids after knockdown of IR56d in sweet GRNs.
Sensilla	Sample Name	0.6% Hexanoic acid	0.2% Octanoic acid	0.2% Linoleic acid	10 mM Sucrose	0.2% Ethnaol (carrier)		Sensilla	Sample Name	0.6% Hexanoic acid	0.2% Octanoic acid	0.2% Linoleic acid	10 mM Sucrose	0.2% Ethnaol (carrier)
5b	Control	66.59	131.1		225.82			5b	IR56dRNAi	10.04			294.89	8.02
5b	Control	121.4	266.4		187.66			5b	IR56dRNAi	47.35	21.03		41.66	-20.38
5b	Control	47.89	104.73		27.13			5b	IR56dRNAi	18.3	8.86		194.73
5b	Control	78.14	119.45		131.02			5b	IR56dRNAi	86.21	85.98	1.4	222.02
5b	Control	6.45	26.51		108.28			5b	IR56dRNAi	63.83	1.56		174.57
5b	Control	196.33	12.4		14.08			5b	IR56dRNAi	17.46			204.88
5b	Control	150	293.23		228.81			5b	IR56dRNAi	2.26			93.77
5b	Control	250.42			242.57			5b	IR56dRNAi	0.35	20.61		545.03
5b	Control	91.09	121.6		99.46			5b	IR56dRNAi	-4.27	9.15		14.37
5b	Control			39.85	116.92	-4.03		5b	IR56dRNAi	35.38	3.89		252.78
5b	Control			13.25	278.14	6.43		5b	IR56dRNAi	18.66	4.67		323.54
5b	Control			54.39	44.66	-2.26		5b	IR56dRNAi	11.92	41.63		200.26
5b	Control			24.78	61.28	0.88		5b	IR56dRNAi	12.67	0.7		37.71
								5b	IR56dRNAi	1.12	1.78		77.8
								5b	IR56dRNAi	11.24	-2.96		333.09
								5b	IR56dRNAi	26.17	105.13		346.5
								5b	IR56dRNAi			15.57	37.54	4.04
								5b	IR56dRNAi			60.66	135.07	1.73
								5b	IR56dRNAi			6.13	249.86	1.66
								5b	IR56dRNAi			-1.89	313.18	2.19
								5b	IR56dRNAi			13.13	134.55	1.02

## Sheet: Figure 5(C)
Figure 5-Source Data 1
(B and C) Ca2+ responses of sweet GRNs associated with 5b (B) or 5s (C) sensilla to fatty acids after knockdown of IR56d in sweet GRNs.
Sensilla	Sample Name	0.6% Hexanoic acid	0.2% Octanoic acid	0.2% Linoleic acid	10 mM Sucrose	0.2% Ethnaol (carrier)		Sensilla	Sample Name	0.6% Hexanoic acid	0.2% Octanoic acid	0.2% Linoleic acid	10 mM Sucrose	0.2% Ethnaol (carrier)
5s	Control	25.4	10.93		460.23			5s	IR56dRNAi	110.55			178.13	4.3
5s	Control	168.23	159.55		252.21			5s	IR56dRNAi	61.86	19.09		124.02	0.98
5s	Control	66.11	104.25		277.05			5s	IR56dRNAi	1.7	8.64		322.93
5s	Control	102.57	107.81		351.8			5s	IR56dRNAi	70.76	145.79	1.14	130.05
5s	Control	68.76	102.46		401.47			5s	IR56dRNAi	95.03	12.88		244.24
5s	Control	127.66	208.5		254.09			5s	IR56dRNAi	5.24	39.09		407.89
5s	Control	173.35	150.56		117.54			5s	IR56dRNAi	-12.36			35.49
5s	Control	40.54	90.56		220.25			5s	IR56dRNAi	5.24	-0.23		510.2
5s	Control			13.51	181.57	3.92		5s	IR56dRNAi	-4.87	28.98		114.11
5s	Control			7.72	249.54	13.41		5s	IR56dRNAi	40.05	13.01		156.19
5s	Control			2.44	90.35	5.47		5s	IR56dRNAi	-0.82	7.05		203.98
								5s	IR56dRNAi	6.94	-0.61		290.97
								5s	IR56dRNAi	5.9	1.63		221.21
								5s	IR56dRNAi	12.94	14.84		395.6
								5s	IR56dRNAi	2.87	7.23		55.44
								5s	IR56dRNAi	18.3	102.77		397.56
								5s	IR56dRNAi			3.77	26.27	4.86
								5s	IR56dRNAi			15.31	79.03	2.72
								5s	IR56dRNAi			3.28	587.29	1.32
								5s	IR56dRNAi			3.69	183.15	3.83
								5s	IR56dRNAi			6.57	176.51	3.6
