# Supplementary material for: Molecular basis of fatty acid taste in Drosophila
Source: eLife journal article supplement (doi:10.7554/elife.30115), 2017-12-12
Supplement: supp [file elife-30115-supp-v1.zip › elife_poa_e30115_Figure_6_figure_supplement_1_source_data_1.xlsx]

## Sheet: (A) Bitter GRN-IR25a mutant-5s
Figure 6 -figure supplement 1-Source Data 1.
(A) Ca2+ responses of bitter GRNs associated with 5s sensilla of IR25a mutant flies to hexanoic acid.
Sensilla	Sample Name	0.5% Hexanoic acid	1 mM Denatonium	1% Ethanol (carrier)		Sensilla	Sample Name	0.5% Hexanoic acid	1 mM Denatonium	1% Ethanol (carrier)		Sensilla	Sample Name	0.5% Hexanoic acid	1 mM Denatonium	1% Ethanol (carrier)
5s	Control	13.69	44.65	7.58		5s	IR25a-/-	9.49	33.14	5.92		5s	Rescue	31.12	53.81	5.45
5s	Control	-3.57	63.59	0.99		5s	IR25a-/-	10.14	96.62	5.57		5s	Rescue	41.76	57.69	3.24
5s	Control	5.25	67	4.46		5s	IR25a-/-	35.88	41.17	4.87		5s	Rescue	-1.88	75.09	12.53
5s	Control	-2.06	55.5	2.15		5s	IR25a-/-	1.22	161.81	2.03		5s	Rescue	1.48	72.32	3.94
5s	Control	-0.77	63.12	7.7		5s	IR25a-/-	12.63	102.76	0.3		5s	Rescue	5.38	102.95
5s	Control	2.6	110.94	6.25		5s	IR25a-/-	0.76	129.69	0.2		5s	Rescue	39.45	140.18
5s	Control	79.76	45	0.19		5s	IR25a-/-	33.84	24.14			5s	Rescue	116.7	28.95
5s	Control	8.65	43.99	1.28		5s	IR25a-/-	10.92	53.63			5s	Rescue	9.94	153.96
5s	Control	30.52	133.76	0.75		5s	IR25a-/-	26.83	136.85			5s	Rescue	62.94	194.19
5s	Control	4.53	97.91	-0.009		5s	IR25a-/-	2.54	107.21			5s	Rescue	37.57	365.42
5s	Control	9.47	86.08	2.86		5s	IR25a-/-	22.73	26.29			5s	Rescue	6.36	128.25
5s	Control	13.33	92.91	-0.33		5s	IR25a-/-	30.19	22.95			5s	Rescue	17	96.61
5s	Control	3.73	55.42	0.5		5s	IR25a-/-	40.25	59.24			5s	Rescue	40.05	28.48
5s	Control	5.6	104.09	0.8		5s	IR25a-/-	28.97	47.46			5s	Rescue	36.74	268.87
5s	Control	0.69	22.58	7.13		5s	IR25a-/-	21.11	89.71			5s	Rescue	60.18	56.02
5s	Control	0.52	47.07	2.07		5s	IR25a-/-	89.97	158.5			5s	Rescue	56.96	157.08
5s	Control	10.23	132.48	6.83		5s	IR25a-/-	21.21	96.79			5s	Rescue	16.59	65.86
5s	Control	-1.76	121.93			5s	IR25a-/-	14.67	118.59			5s	Rescue	1.14	117.11
5s	Control	4.05	62.41			5s	IR25a-/-	39.57	67.85			5s	Rescue	10.81	93.01
5s	Control	-0.28	93.54			5s	IR25a-/-	17.07	78.48			5s	Rescue	10.34	35.04
5s	Control	-0.76	52.62			5s	IR25a-/-	-0.12	110.28
5s	Control	65.31	63.85			5s	IR25a-/-	9.21	47.85
5s	Control	0.13	35.21			5s	IR25a-/-	34.4	147
5s	Control	5.75	146.2			5s	IR25a-/-	14.35	158.04
5s	Control		124.47			5s	IR25a-/-	-3.88	147.89
5s	Control		295.25			5s	IR25a-/-	37.88	335.3
5s	Control		53.13			5s	IR25a-/-	29.9	125.11
5s	Control		326.45			5s	IR25a-/-	3.6	55.14
5s	Control		23.42			5s	IR25a-/-		48.98
5s	Control		64.13			5s	IR25a-/-		398.07
5s	Control		34.49
5s	Control		631.83
5s	Control		79.45
5s	Control		100.14
5s	Control		43.55
5s	Control		73.64
5s	Control		107.57
5s	Control		281.98
5s	Control		91.3

## Sheet: (B) Bitter GRN-IR76b mutant-5s
Figure 6 -figure supplement 1-Source Data 1.
(B) Ca2+ responses of bitter GRNs associated with 5s sensilla of IR76b mutant flies to hexanoic acid.
Sensilla	Sample Name	0.5% Hexanoic acid	1 mM Denatonium	1% Ethanol (carrier)		Sensilla	Sample Name	0.5% Hexanoic acid	1 mM Denatonium	1% Ethanol (carrier)		Sensilla	Sample Name	0.5% Hexanoic acid	1 mM Denatonium	1% Ethanol (carrier)
5s	Control	19.75	204.61	6.26		5s	IR76b-/-	6.02	220.14	0.8		5s	Rescue	21.64	98.66	8.91
5s	Control	2.95	103.17	-0.67		5s	IR76b-/-	40.07	201.45	-1.46		5s	Rescue	64.05	199.07	0.2
5s	Control	2.95	292.95	9.16		5s	IR76b-/-	24.72	171.63	2.94		5s	Rescue	19.15	113.16	0.72
5s	Control	3.47	118.26	24.32		5s	IR76b-/-	10.1	86.66	1.22		5s	Rescue	9.58	93.44	2.4
5s	Control	2.14	75.83			5s	IR76b-/-	15.78	259.51	1.11		5s	Rescue	12.56	87.84	-0.69
5s	Control	8.01	66.95			5s	IR76b-/-	28.46	43.61			5s	Rescue	63.16	304.56
5s	Control	10.5	227.14			5s	IR76b-/-	24.34	49.11			5s	Rescue	14.01	50.59
5s	Control	3.97	292.98			5s	IR76b-/-	15.87	57.11			5s	Rescue	23.22	195.38
5s	Control	10.21	147.83			5s	IR76b-/-	2.87	195.01			5s	Rescue	1.2	33.51
5s	Control	25.11	121.67			5s	IR76b-/-	5.47	109.63			5s	Rescue	15.89	157.23
5s	Control	46.27	138.89			5s	IR76b-/-	4.61	120.15			5s	Rescue	27.85	148.77
5s	Control	6.99	99.63			5s	IR76b-/-	12.88	309.31			5s	Rescue	13.43	120.25
5s	Control	0.59	40.36			5s	IR76b-/-	27.81	156.4			5s	Rescue	18.4	78.97
						5s	IR76b-/-	2.01	134.87			5s	Rescue	26.85	171.96
						5s	IR76b-/-	34.74	77.13			5s	Rescue	15.48	217.39
						5s	IR76b-/-	2.05	249.42			5s	Rescue	45.94	137.76
						5s	IR76b-/-	217.09	260.5
						5s	IR76b-/-	3.45	123.6
						5s	IR76b-/-	0.56	92.35
						5s	IR76b-/-	41.78	37.56
						5s	IR76b-/-	9.83	91.95
						5s	IR76b-/-	18.03	77.75
