# Supplementary material for: Molecular basis of fatty acid taste in Drosophila
Source: eLife journal article supplement (doi:10.7554/elife.30115), 2017-12-12
Supplement: supp [file elife-30115-supp-v1.zip › elife_poa_e30115_Figure_6_source_data_1.xlsx]

## Sheet: Figure 6(B)
Figure 6-Source Data 1.
(B) Ca2+ responses of bitter GRNs associated with 5b or 5s sensilla to fatty acids
Sensilla	0.5% Hexanoic acid	0.2% Octanoic acid	0.2% Linoleic acid	1mM Denatonium	1% Ethanol		Sensilla	0.5% Hexanoic acid	0.2% Octanoic acid	0.2% Linoleic acid	1mM Denatonium	1% Ethanol
5b	208.89	4.26	12.16	245.91	3.75		5s	19.75	-2.37	2.31	204.61	6.26
5b	30.01	1.95	7.22	249.9	9.6		5s	2.95	-6.39	6.46	103.17	-0.67
5b	43	-3.63	5.48	292.19	-1.34		5s	2.95	-1.87	11.48	292.95	9.16
5b	153.96	-1.45	-0.24	224.54	10.27		5s	3.47	-2.5	-1.85	118.26	24.32
5b	17.97	109.64	0.42	239.3	6.03		5s	2.14	2.5	7.26	75.83	21.33
5b	37	8.87	64.19	294.01	0.33		5s	8.01	4.47	91.39	66.95	-2.42
5b	75.1	65.62	3.06	556.17	17.19		5s	10.5	-4.69	9.28	227.14	-1.81
5b	87.37	153.81	40.55	404.85	6.2		5s	3.97	34.21	47.11	292.98	5.15
5b	183.15	14.34	27.43	674.61	-0.91		5s	10.21	2.8	3.81	147.83	-2.65
5b	279.54	90.41	8.89	133.2	11.81		5s	25.11	58.77	12.08	121.67	4.99
5b	110.3	137.07	9.21	302.44			5s	46.27	31.69	7.93	138.89
5b	22.17	18.89	34	170.75			5s	6.99	-3.46	1.33	99.63
5b		5.96	0	792.99			5s	0.59	-1.21	11.09	40.36
5b		8.27	0.76	116.04			5s		-2.22	-0.71	203.53
5b		17.52	1.48	361.35			5s		0.71	1.48	38.23
5b		173.7	61.88	443.24			5s		54.86		219.05
5b		6.65	3.54	497.36			5s		8.67	-2.27	86.75
5b				48.5			5s				209.93
5b				61			5s				90.5
5b				90.19			5s				175.64
5b				827.02			5s				77.64
5b				287.99			5s				669.07
5b				365.57			5s				92.09
5b				58.85			5s				69.17
5b				49.17			5s				56.75
5b				188.77			5s				113.47
5b				587.7			5s				64.31
5b				145.68			5s				111.57
5b				71.25			5s				135.71
							5s				200.22

## Sheet: Figure 6(C)
Figure 6-Source Data 1.
(C) Ca2+ responses of bitter GRNs associated with 5b sensilla from IR25a mutant flies to hexanoic acid.
Sensila	Sample Name	0.5% Hexanoic acid	1mM Denatonium	1% Ethanol		Sensila	Sample Name	0.5% Hexanoic acid	1mM Denatonium	1% Ethanol		Sensila	Sample Name	0.5% Hexanoic acid	1mM Denatonium	1% Ethanol
5b	Control	13.09	71.57	-0.15		5b	IR25a-/-	167.32	384.88	0.34		5b	Rescue	25.01	51.37	-1
5b	Control	56.62	152.23	0.98		5b	IR25a-/-	11.62	269.06	11.05		5b	Rescue	134.25	65.78	1.28
5b	Control	0.07	165.26	5.22		5b	IR25a-/-	119.76	103.1	8.69		5b	Rescue	42.1	179.6	4.9
5b	Control	4.78	336.72	1.79		5b	IR25a-/-	0.2	279.15	1.63		5b	Rescue	28.1	217.17	6
5b	Control	2.18	310.43	3.38		5b	IR25a-/-	10.72	118.9	2.91		5b	Rescue	172.48	183.45
5b	Control	0.84	157.55	-0.04		5b	IR25a-/-	34.65	33.97	1.21		5b	Rescue	3.74	98.04
5b	Control	5.2	55.46	-1.03		5b	IR25a-/-	121.22	216.84			5b	Rescue	98.41	255.08
5b	Control	310.97	59.52	0.83		5b	IR25a-/-	12.95	164.04			5b	Rescue	184.89	79.12
5b	Control	328.54	130.69	7.24		5b	IR25a-/-	123.89	535.31			5b	Rescue	107.75	199.15
5b	Control	72.93	232.73	2.19		5b	IR25a-/-	0.82	109.53			5b	Rescue	24.24	643.77
5b	Control	114.91	204.8	0.52		5b	IR25a-/-	4.64	116.72			5b	Rescue	31.9	127.48
5b	Control	216.28	67.59	2.98		5b	IR25a-/-	60.81	180.01			5b	Rescue	128.13	361.47
5b	Control	27.68	71.9	3.08		5b	IR25a-/-	5.45	216.25			5b	Rescue	425.47	136.33
5b	Control	22.07	148.66	3.77		5b	IR25a-/-	40.65	105.15			5b	Rescue	102.01	121.94
5b	Control	82.52	371.71	1.08		5b	IR25a-/-	78.18	299.71			5b	Rescue	47.64	233.55
5b	Control	28.44	213.5	0.19		5b	IR25a-/-	21.5	90.65			5b	Rescue	50.84	120.16
5b	Control	134.41	78.51	7.26		5b	IR25a-/-	120.73	41.05			5b	Rescue	27.27	118.97
5b	Control	72.81	190.33			5b	IR25a-/-	95.32	73.02			5b	Rescue	66.1	155.59
5b	Control	33.53	325.06			5b	IR25a-/-	178.8	139.33
5b	Control	36.33	330.17			5b	IR25a-/-	95.32	98.77
5b	Control	39.33	176.15			5b	IR25a-/-	148.67	92.22
5b	Control	66.23	529.12			5b	IR25a-/-	135.69	300.1
5b	Control	218.17	651.59			5b	IR25a-/-	90.67	66.37
5b	Control	118.36	326.28			5b	IR25a-/-	203.86	227.4
5b	Control	175.21	273.46			5b	IR25a-/-	6.27	347.34
5b	Control	7.62	357.8			5b	IR25a-/-	29.08	440.56
5b	Control	65.32	246.84			5b	IR25a-/-	48.34	976.53
5b	Control		347.48			5b	IR25a-/-	6.99	45.43
5b	Control		301.71			5b	IR25a-/-	28.89	96.13
5b	Control		180.08			5b	IR25a-/-	66.93	400.98
5b	Control		325.37			5b	IR25a-/-	43.5	635.61
5b	Control		250.95
5b	Control		43.64
5b	Control		209.79
5b	Control		383.26
5b	Control		253.32
5b	Control		81.11
5b	Control		112.12
5b	Control		509.69
5b	Control		330.14
5b	Control		744.36
5b	Control		119.77

## Sheet: Figure 6(D)
Figure 6-Source Data 1.
(D) Ca2+ responses of bitter GRNs associated with 5b sensilla from IR76b mutant flies to hexanoic acid.
Sensila	Sample Name	0.5% Hexanoic acid	1mM Denatonium	1% Ethanol		Sensila	Sample Name	0.5% Hexanoic acid	1mM Denatonium	1% Ethanol		Sensila	Sample Name	0.5% Hexanoic acid	1mM Denatonium	1% Ethanol
5b	Control	208.89	245.91	3.75		5b	IR76b-/-	-2.29	223.63	1.35		5b	Rescue	11.25	277.03	4.64
5b	Control	30.01	249.9	9.6		5b	IR76b-/-	137.95	432.59	0.24		5b	Rescue	57.31	308.75	0.38
5b	Control	43	292.19	-1.34		5b	IR76b-/-	19.5	106.41	1.55		5b	Rescue	65.67	133.71	0.2
5b	Control	153.96	224.54	10.27		5b	IR76b-/-	313.69	301.52	0.6		5b	Rescue	15.82	158.08	2.33
5b	Control	17.97	239.3			5b	IR76b-/-	206.09	270.52	3		5b	Rescue	49.29	218.77	0.76
5b	Control	37	294.01			5b	IR76b-/-	5.6	150.84			5b	Rescue	349.22	434.85
5b	Control	75.1	556.17			5b	IR76b-/-	31.2	310.34			5b	Rescue	65.4	164.22
5b	Control	87.37	404.85			5b	IR76b-/-	19.83	247.66			5b	Rescue	53.19	143.25
5b	Control	183.15	674.61			5b	IR76b-/-	33.94	413.04			5b	Rescue	118.64	73.42
5b	Control	279.54	133.2			5b	IR76b-/-	47.98	432.63			5b	Rescue	58.89	192.35
5b	Control	110.3	302.44			5b	IR76b-/-	73.57	85.45			5b	Rescue	172.35	340.92
5b	Control	22.17	170.75			5b	IR76b-/-	43.02	305.94			5b	Rescue	139.96	260.79
						5b	IR76b-/-	304.29	72.75			5b	Rescue	66.88	341.01
						5b	IR76b-/-	11.75	66.86			5b	Rescue	27.94	241.09
						5b	IR76b-/-	248.13	220.01			5b	Rescue		270.02
						5b	IR76b-/-	0.39	262.52			5b	Rescue		70.31
						5b	IR76b-/-	105.88	77.72
						5b	IR76b-/-	67.41	143.44
						5b	IR76b-/-		174.08
