# Supplementary material for: Molecular basis of fatty acid taste in Drosophila
Source: eLife journal article supplement (doi:10.7554/elife.30115), 2017-12-12
Supplement: supp [file elife-30115-supp-v1.zip › elife_poa_e30115_Figure_7_figure_supplement_1_source_data_1.xlsx]

## Sheet: (A) sweet GRN-5s and 5v
Figure 7-figure supplement 1-Source Data 1.
(A and B) Ca2+ responses of sweet GRNs associated with 5s (A) or 5v (B) sensilla to different dosages of hexanoic acid
Sensilla	0.1% Hexanoic acid	0.5% Hexanoic acid	1% Hexanoic acid	2.5% Hexanoic acid	10 mM Sucrose	1% Ethanol (carrier)		Sensilla	0.1% Hexanoic acid	0.5% Hexanoic acid	1% Hexanoic acid	2.5% Hexanoic acid	10 mM Sucrose	1% Ethanol (carrier)
5s	2.84	31.81	9.99	2.5% Hexanoic acid	25.66	13.01		5v	2.52	37.83	2.53	-13.57	47.63	0.34
5s	0.57	4.67	52.94	4.23	146.85	12.35		5v	5.22	4.34	-1.29	0.28	265.8	12.97
5s	17.85	53.91	-1.69	88.31	39	1.95		5v	6.07	7.14	2.23	-1.07	164.01	-0.7
5s	71.78	26.03	4.5	58.94	90.25	12.63		5v	2.24	4.6	6.71	3.36	150.23	6.73
5s	83.52	24.26	93.62	61.21	82.84	6.71		5v	2.68	17.36	4.85	4.42	185.47	-0.39
5s	41.92	23.45	194.9	69.23	185.19	-1.26		5v	39.4	6.57	7.46	16.75	530.61	2.56
5s	25.64	200.78	11.57	28.19	106.63	0.8		5v	34.6	10.94	4.43	-1.2	57.72	2.63
5s	96.28	13.55	43.65	210.37	115.11	1.43		5v	-5.3	134.16	1.17	58.99	135.31	3.34
5s	3.14	16.95	214.25	137.62	43.91	1.46		5v	2.37	2.45	-0.47	5.5	188.99	4.38
5s	6.23	19.01	45.27	35.13	82.47	2.61		5v	1.37	19.67	0.81	0.44	79.96	-0.77
5s	2.98	5.23	37.02	54.8	46.35	0.88		5v	10.44	88.99	2.44	11.49	221.33	-2.64
5s	1.25	4.72	69.23	46.79	90.14	1.88		5v	4.85	-1.46	1.68	26.39	202.3	1.58
5s	29.74	8.44	3.66	92.24	145.47	5.98		5v	3.55	0.79	13.95	2.65	94.67	6.69
5s	12.3	20.7	-3.13	112.62	31.88	7.44		5v	-1.9	1.77	-5.38	6.57	124.41
5s	10.02	6.03	55.77	69.53	28.36			5v	33.56	12.83	6.74	87.06	77.95
5s	18.1	34.77	1.67	38.47	401.59			5v	3.19	7.38	1.31	61.66	34.5
5s		22.7		38.72	51.63			5v	-6.23	2.04		58.85	202.33
5s		83.66		0.52	120.65			5v	1.38	5.56		11.77	256.21
5s		274.72		46.68	97.77			5v		0.01		-1.35	327.02
5s		211.73		174.82	104.83			5v		71.58		44.23	358.71
5s		20.72		139.89	128.73			5v		34.47		1.94	193.81
5s		5.11		10.12	82.08			5v		0.95		2.6	308.04
5s		429.59		70.32	210.07			5v		5.99		28.02	249.72
5s		27.88		28.18	207.62			5v		67.79		-4.25	293.67
5s		21			95.9			5v		18.47		15.31	173.18
5s		35.09			127.9			5v		1.19		17.43	369.26
5s		4.88			31.97			5v		23.48		6.45	146.63
5s					120.26			5v		48			230.04
5s					88.18			5v		30.61			212.72
5s					222.66			5v					241.29
5s					90.26			5v					79.74
5s					97.88			5v					104.12
5s					108.89			5v					430.1
5s					58.87			5v					71.6
5s					280.55			5v					122.72
5s					72.48			5v					163.7
5s					119.56			5v					220.38
5s					298.25			5v					574.52
5s					405.63			5v					535.46
5s					119.76			5v					229.79
5s					163.35			5v					216.17
5s					45.42			5v					184.27
5s					54			5v					237.11
5s					261.26			5v					356.81
5s					218.28			5v					402.18
5s					264.07			5v					148.19

## Sheet: (C) Bitter GRN-5s
Figure 7-figure supplement 1-Source Data 1.
(C) Ca2+ responses of bitter GRNs associated with 5s sensilla to different dosages of hexanoic acid
Sensilla	0.1% Hexanoic acid	0.5% Hexanoic acid	1% Hexanoic acid	2.5% Hexanoic acid	1 mM Denatonium	1% Ethanol (carrier)
5s	4.58	13.69	26.29	4.73	44.65	7.58
5s	76.63	-3.57	12.59	35.8	63.59	0.99
5s	3.86	5.25	4.45	2.28	67	4.46
5s	-3.21	-2.06	21.93	1.49	55.5	2.15
5s	13.7	-0.77	9.4	5.54	63.12	7.7
5s	0.68	2.6	21.86	1.9	110.94	6.25
5s	36.93	79.76	45.81	93.21	45	0.19
5s	2.33	8.65	12.92	49.4	43.99	1.28
5s	15.52	30.52	-0.02	118.63	133.76	0.75
5s	11.08	4.53	19.21	-0.88	97.91	-0.009
5s	14.19	9.47	52.73	7.59	86.08	2.86
5s	-0.27	13.33	35.73	28.48	92.91	-0.33
5s	-0.06	3.73	2.32	29.36	55.42	0.5
5s	8.58	5.6	5.44	12.15	104.09	0.8
5s	7.12	0.69	37.42	-0.72	22.58	7.13
5s		0.52		0.39	47.07	2.07
5s		10.23		18.45	132.48	6.83
5s		-1.76		3.68	121.93	8.54
5s		4.05		-11.46	62.41	9.19
5s		-0.28		2.86	93.54	10.98
5s		-0.76		18.99	52.62	7.67
5s		65.31		41.13	63.85
5s		0.13		0.64	35.21
5s		5.75		3.91	146.2
5s					124.47
5s					295.25
5s					53.13
5s					326.45
5s					23.42
5s					64.13
5s					34.49
5s					631.83
5s					79.45
5s					100.14
5s					43.55
5s					73.64
5s					107.57
5s					281.98
5s					91.3
5s					196.05
5s					73.37
5s					183.74
5s					132.43
5s					22.63
5s					197.81
5s					24.65
5s					52.59
5s					47.08
5s					183.84
5s					67.76
5s					192.49
5s					53.06
5s					208.56
5s					75.57
5s					224.31
