# Supplementary material for: Molecular basis of fatty acid taste in Drosophila
Source: eLife journal article supplement (doi:10.7554/elife.30115), 2017-12-12
Supplement: supp [file elife-30115-supp-v1.zip › elife_poa_e30115_Figure_7_figure_supplement_2_source_data.xlsx]

## Sheet: Fig.7-figure supplement 2
Figure 7-figure supplement 2-Source Data 1.
PER responses of flies to different dosages of hexanoic acid when bitter GRNs are inactivated by expression of UAS-Kir2.1.
Sample Name	0.1% Hexanoic acid	0.5% Hexanoic acid	1% Hexanoic acid	2.5% Hexanoic acid	100 mM Sucrose		Sample Name	0.1% Hexanoic acid	0.5% Hexanoic acid	1% Hexanoic acid	2.5% Hexanoic acid	100 mM Sucrose		Sample Name	0.1% Hexanoic acid	0.5% Hexanoic acid	1% Hexanoic acid	2.5% Hexanoic acid	100 mM Sucrose
Gr33aGAL4 alone	0	0	0	0	33.33		UAS-Kir2.1 alone	0	33.33	0	0	0		Gr33aGAL4/UAS-Kir2.1	0	0	0	0	100
Gr33aGAL4 alone	0	0	0	33.33	66.66		UAS-Kir2.1 alone	0	0	33.33	0	66.66		Gr33aGAL4/UAS-Kir2.1	100	100	33.33	33.33	100
Gr33aGAL4 alone	0	0	33.33	0	100		UAS-Kir2.1 alone	0	33.33	0	0	33.33		Gr33aGAL4/UAS-Kir2.1	0	0	100	100	100
Gr33aGAL4 alone	66.66	0	0	33.33	0		UAS-Kir2.1 alone	66.66	0	66.66	33.33	100		Gr33aGAL4/UAS-Kir2.1	0	66.66	0	100	100
Gr33aGAL4 alone	0	0	66.66	0	100		UAS-Kir2.1 alone	0	66.66	33.33	0	66.66		Gr33aGAL4/UAS-Kir2.1	0	0	0	0	33.33
Gr33aGAL4 alone	66.66	66.66	0	0	100		UAS-Kir2.1 alone	100	100	100	66.66	100		Gr33aGAL4/UAS-Kir2.1	0	0	0	33.33	33.33
Gr33aGAL4 alone	0	0	0	0	66.66		UAS-Kir2.1 alone	0	0	33.33	0	33.33		Gr33aGAL4/UAS-Kir2.1	0	33.33	66.66	100	100
Gr33aGAL4 alone	100	100	0	0	33.33		UAS-Kir2.1 alone	33.33	66.66	66.66	33.33	100		Gr33aGAL4/UAS-Kir2.1	33.33	66.66	100	66.66	100
Gr33aGAL4 alone	0	0	0	0	33.33		UAS-Kir2.1 alone	33.33	33.33	33.33	33.33	100		Gr33aGAL4/UAS-Kir2.1	100	100	66.66	33.33	100
Gr33aGAL4 alone	0	0	66.66	0	100		UAS-Kir2.1 alone	0	0	100	33.33	100		Gr33aGAL4/UAS-Kir2.1	0	33.33	0	100	100
Gr33aGAL4 alone	66.66	33.33	0	0	0		UAS-Kir2.1 alone	0	0	66.66	66.66	66.66		Gr33aGAL4/UAS-Kir2.1	100	100	100	100	100
Gr33aGAL4 alone	0	0	0	0	66.66		UAS-Kir2.1 alone	0	33.33	0	0	66.66		Gr33aGAL4/UAS-Kir2.1	100	66.66	66.66	100	100
Gr33aGAL4 alone	33.33	0	0	0	66.66		UAS-Kir2.1 alone	0	0	33.33	33.33	33.33		Gr33aGAL4/UAS-Kir2.1	33.33	0	0	0	0
Gr33aGAL4 alone	0	33.33	0	0	100		UAS-Kir2.1 alone	33.33	66.66	33.33	0	100		Gr33aGAL4/UAS-Kir2.1	33.33	0	0	0	66.66
Gr33aGAL4 alone	0	33.33	100	100	100		UAS-Kir2.1 alone	0	0	0	0	33.33		Gr33aGAL4/UAS-Kir2.1	100	100	33.33	66.66	100
Gr33aGAL4 alone	66.66	0	33.33	0	33.33		UAS-Kir2.1 alone	0	33.33	33.33	0	100		Gr33aGAL4/UAS-Kir2.1	33.33	0	0	0	100
Gr33aGAL4 alone	0	33.33	66.66	33.33	100		UAS-Kir2.1 alone	0	66.66	0	0	0		Gr33aGAL4/UAS-Kir2.1	0	33.33	0	0	100
Gr33aGAL4 alone	100	100	33.33	0	33.33		UAS-Kir2.1 alone	0	33.33	0	0	33.33		Gr33aGAL4/UAS-Kir2.1	100	100	0	0	100
Gr33aGAL4 alone	100	100	0	0	100		UAS-Kir2.1 alone	0	0	0	0	0		Gr33aGAL4/UAS-Kir2.1	100	100	100	100	100
Gr33aGAL4 alone	66.66	0	100	33.33	100		UAS-Kir2.1 alone	0	33.33	66.66	66.66	100		Gr33aGAL4/UAS-Kir2.1	66.66	100	33.33	33.33	100
Gr33aGAL4 alone	0	0	33.33	0	100		UAS-Kir2.1 alone	0	33.33	0	0	33.33		Gr33aGAL4/UAS-Kir2.1	66.66	33.33	33.33	66.66	66.66
Gr33aGAL4 alone	0	0	33.33	0	100		UAS-Kir2.1 alone	0	0	66.66	100	100		Gr33aGAL4/UAS-Kir2.1	33.33	0	100	100	100
Gr33aGAL4 alone	0	66.66	66.66	33.33	100		UAS-Kir2.1 alone	66.66	0	0	100	100		Gr33aGAL4/UAS-Kir2.1	66.66	100	100	100	100
Gr33aGAL4 alone	0	0	0	0	100		UAS-Kir2.1 alone	100	100	33.33	0	33.33		Gr33aGAL4/UAS-Kir2.1	0	0	0	0	33.33
Gr33aGAL4 alone	0	0	0	0	100		UAS-Kir2.1 alone	0	0	33.33	33.33	100		Gr33aGAL4/UAS-Kir2.1	33.33	0	33.33	66.66	0
Gr33aGAL4 alone	66.66	100	0	0	100		UAS-Kir2.1 alone	0	0	0	0	0		Gr33aGAL4/UAS-Kir2.1	0	0	66.66	66.66	100
Gr33aGAL4 alone	100	0	0	0	0		UAS-Kir2.1 alone	33.33	0	0	0	66.66		Gr33aGAL4/UAS-Kir2.1	0	0	66.66	66.66	66.66
Gr33aGAL4 alone	0	66.66	33.33	0	66.66		UAS-Kir2.1 alone	0	33.33	0	0	66.66		Gr33aGAL4/UAS-Kir2.1	0	0	66.66	66.66	100
Gr33aGAL4 alone	66.66	100	0	0	33.33		UAS-Kir2.1 alone	0	0	100	33.33	100		Gr33aGAL4/UAS-Kir2.1	0	0	66.66	33.33	100
Gr33aGAL4 alone	0	100	33.33	33.33	100		UAS-Kir2.1 alone	0	33.33	0	0	66.66		Gr33aGAL4/UAS-Kir2.1	0	0	100	100	100
Gr33aGAL4 alone	0	100	0	0	66.66		UAS-Kir2.1 alone	0	0	0	0	33.33		Gr33aGAL4/UAS-Kir2.1	100	100	100	100	100
Gr33aGAL4 alone	0	0	66.66	0	66.66		UAS-Kir2.1 alone	100	100	0	0	33.33		Gr33aGAL4/UAS-Kir2.1	66.66	0	66.66	66.66	100
Gr33aGAL4 alone	0	0	66.66	100	100		UAS-Kir2.1 alone	0	0	0	0	0		Gr33aGAL4/UAS-Kir2.1	100	100	100	100	100
Gr33aGAL4 alone	33.33	0	66.66	0	100		UAS-Kir2.1 alone	0	0	0		33.33		Gr33aGAL4/UAS-Kir2.1	33.33	33.33	66.66	33.33	100
Gr33aGAL4 alone	0	33.33	33.33	66.66	100		UAS-Kir2.1 alone	66.66	0	33.33		33.33		Gr33aGAL4/UAS-Kir2.1	33.33	66.66	100	100	100
Gr33aGAL4 alone	0	0	0	0	100		UAS-Kir2.1 alone	100	66.66	33.33		0		Gr33aGAL4/UAS-Kir2.1	0	0	100	100	100
Gr33aGAL4 alone	0	33.33	0	0	66.66		UAS-Kir2.1 alone			33.33		0		Gr33aGAL4/UAS-Kir2.1			100	33.33	100
Gr33aGAL4 alone	0	33.33	33.33	0	100		UAS-Kir2.1 alone			33.33		33.33		Gr33aGAL4/UAS-Kir2.1			100	100	100
Gr33aGAL4 alone	33.33	66.66	0	0	100		UAS-Kir2.1 alone			100		100		Gr33aGAL4/UAS-Kir2.1			66.66	66.66	100
Gr33aGAL4 alone	0	0	33.33	0	100		UAS-Kir2.1 alone			0		66.66		Gr33aGAL4/UAS-Kir2.1			100	100	100
Gr33aGAL4 alone	0	33.33	0	0	100		UAS-Kir2.1 alone			100		100		Gr33aGAL4/UAS-Kir2.1			100	100	100
Gr33aGAL4 alone	0	66.66	100	100	100		UAS-Kir2.1 alone			100		100		Gr33aGAL4/UAS-Kir2.1			33.33	33.33	100
Gr33aGAL4 alone	66.66	100	100	100	100		UAS-Kir2.1 alone			0		33.33		Gr33aGAL4/UAS-Kir2.1			100	66.66	100
Gr33aGAL4 alone			0	0	100		UAS-Kir2.1 alone			0		0		Gr33aGAL4/UAS-Kir2.1			0	33.33	66.66
Gr33aGAL4 alone			0	33.33	66.66		UAS-Kir2.1 alone			66.66		100		Gr33aGAL4/UAS-Kir2.1			100	100	100
Gr33aGAL4 alone			100	100	100		UAS-Kir2.1 alone			0		0		Gr33aGAL4/UAS-Kir2.1			0		100
Gr33aGAL4 alone			100	100	100		UAS-Kir2.1 alone			100		66.66		Gr33aGAL4/UAS-Kir2.1			100		100
Gr33aGAL4 alone			33.33	33.33	100		UAS-Kir2.1 alone			0		66.66		Gr33aGAL4/UAS-Kir2.1			0		66.66
Gr33aGAL4 alone			100	66.66	100		UAS-Kir2.1 alone			33.33		66.66		Gr33aGAL4/UAS-Kir2.1			66.66		100
Gr33aGAL4 alone			0	33.33	100		UAS-Kir2.1 alone			33.33		66.66		Gr33aGAL4/UAS-Kir2.1			66.66		100
Gr33aGAL4 alone			100	100	100		UAS-Kir2.1 alone			33.33		100		Gr33aGAL4/UAS-Kir2.1			0		100
Gr33aGAL4 alone			33.33	0	100		UAS-Kir2.1 alone			0		100		Gr33aGAL4/UAS-Kir2.1			0		66.66
Gr33aGAL4 alone			66.66	100	100		UAS-Kir2.1 alone			33.33		66.66		Gr33aGAL4/UAS-Kir2.1			100		100
Gr33aGAL4 alone			33.33	100	100		UAS-Kir2.1 alone			0		33.33		Gr33aGAL4/UAS-Kir2.1			100		100
Gr33aGAL4 alone			0	33.33	100		UAS-Kir2.1 alone			66.66		100		Gr33aGAL4/UAS-Kir2.1			0		100
Gr33aGAL4 alone			0	0	100		UAS-Kir2.1 alone			0		100		Gr33aGAL4/UAS-Kir2.1			100		100
Gr33aGAL4 alone			0	0	100		UAS-Kir2.1 alone			100		100		Gr33aGAL4/UAS-Kir2.1			100		100
Gr33aGAL4 alone			33.33	0	100		UAS-Kir2.1 alone			0		33.33		Gr33aGAL4/UAS-Kir2.1			0		100
Gr33aGAL4 alone			0	0	33.33		UAS-Kir2.1 alone			0		66.66		Gr33aGAL4/UAS-Kir2.1			0		100
Gr33aGAL4 alone			0	0	33.33		UAS-Kir2.1 alone			0		0		Gr33aGAL4/UAS-Kir2.1			66.66		100
Gr33aGAL4 alone			0	0	100		UAS-Kir2.1 alone			33.33		100		Gr33aGAL4/UAS-Kir2.1			0		66.66
Gr33aGAL4 alone			0	0	100		UAS-Kir2.1 alone			33.33		33.33		Gr33aGAL4/UAS-Kir2.1			0		0
Gr33aGAL4 alone			100	66.66	100		UAS-Kir2.1 alone			66.66		66.66		Gr33aGAL4/UAS-Kir2.1			66.66		100
Gr33aGAL4 alone			0	0	66.66		UAS-Kir2.1 alone			0		33.33		Gr33aGAL4/UAS-Kir2.1			100		100
Gr33aGAL4 alone			33.33	66.66	100		UAS-Kir2.1 alone			100		100		Gr33aGAL4/UAS-Kir2.1			66.66		66.66
Gr33aGAL4 alone			0	0	100		UAS-Kir2.1 alone			0		66.66		Gr33aGAL4/UAS-Kir2.1			100		100
Gr33aGAL4 alone			0	0	100		UAS-Kir2.1 alone			0		0		Gr33aGAL4/UAS-Kir2.1			0		66.66
Gr33aGAL4 alone			100	0	100		UAS-Kir2.1 alone			100		100		Gr33aGAL4/UAS-Kir2.1			100		100
Gr33aGAL4 alone			0	0	0		UAS-Kir2.1 alone			100		100		Gr33aGAL4/UAS-Kir2.1			66.66		100
Gr33aGAL4 alone			0	0	100									Gr33aGAL4/UAS-Kir2.1			66.66		100
Gr33aGAL4 alone			0	0	33.33									Gr33aGAL4/UAS-Kir2.1			0		66.66
Gr33aGAL4 alone			0	0	0									Gr33aGAL4/UAS-Kir2.1			0		0
Gr33aGAL4 alone			33.33	0	100									Gr33aGAL4/UAS-Kir2.1			0		100
Gr33aGAL4 alone			0	0	100									Gr33aGAL4/UAS-Kir2.1			0		0
Gr33aGAL4 alone			66.66	0	100									Gr33aGAL4/UAS-Kir2.1			33.33		100
Gr33aGAL4 alone			33.33	0	100									Gr33aGAL4/UAS-Kir2.1			100		100
Gr33aGAL4 alone			33.33	0	100									Gr33aGAL4/UAS-Kir2.1			66.66		100
Gr33aGAL4 alone			0	0	0									Gr33aGAL4/UAS-Kir2.1			66.66		100
Gr33aGAL4 alone			0		0									Gr33aGAL4/UAS-Kir2.1			66.66		100
Gr33aGAL4 alone			0		33.33									Gr33aGAL4/UAS-Kir2.1			33.33		100
Gr33aGAL4 alone			0		100									Gr33aGAL4/UAS-Kir2.1			0		100
Gr33aGAL4 alone			0		100
Gr33aGAL4 alone			0		100
Gr33aGAL4 alone			0		100
Gr33aGAL4 alone			100		100
Gr33aGAL4 alone			0		66.66
Gr33aGAL4 alone			0		100
Gr33aGAL4 alone			0		0
Gr33aGAL4 alone			0		100
Gr33aGAL4 alone			0		33.33
Gr33aGAL4 alone			66.66		100
Gr33aGAL4 alone			33.33		100
Gr33aGAL4 alone			0		100
Gr33aGAL4 alone			0		100
Gr33aGAL4 alone			0		100
Gr33aGAL4 alone			0		100
Gr33aGAL4 alone			0		100
Gr33aGAL4 alone			0		100
Gr33aGAL4 alone					100
Gr33aGAL4 alone					100
Gr33aGAL4 alone					100
Gr33aGAL4 alone					66.66
Gr33aGAL4 alone					0
Gr33aGAL4 alone					100
Gr33aGAL4 alone					100
Gr33aGAL4 alone					100
Gr33aGAL4 alone					100
Gr33aGAL4 alone					100
Gr33aGAL4 alone					100
Gr33aGAL4 alone					100
Gr33aGAL4 alone					100
Gr33aGAL4 alone					66.66
Gr33aGAL4 alone					66.66
Gr33aGAL4 alone					33.33
Gr33aGAL4 alone					66.66
Gr33aGAL4 alone					100
Gr33aGAL4 alone					100
Gr33aGAL4 alone					100
Gr33aGAL4 alone					33.33
Gr33aGAL4 alone					33.33
Gr33aGAL4 alone					100
