# Supplementary material for: Molecular basis of fatty acid taste in Drosophila
Source: eLife journal article supplement (doi:10.7554/elife.30115), 2017-12-12
Supplement: supp [file elife-30115-supp-v1.zip › elife_poa_e30115_Figure_7_source_data_1.xlsx]

## Sheet: Figure 7(A)
Figure 7-Source Data 1.
(A) Ca2+ responses of sweet or bitter GRNs associated with 5b sensilla to different dosages of hexanoic acid.
Sensilla	GRN	0.1% Hexanoic acid	0.5% Hexanoic acid	1% Hexanoic acid	2.5% Hexanoic acid	10 mM Sucrose	1% Ethanol (carrier)		Sensilla	GRN	0.1% Hexanoic acid	0.5% Hexanoic acid	1% Hexanoic acid	2.5% Hexanoic acid	10 mM Sucrose	1% Ethanol (carrier)
5b	sweet	55.72	28.68	19.82	47.12	25.26	4.14		5b	Bitter	19.96	13.09	51.78	62.23	71.57	-0.15
5b	sweet	41.28	28.3	119.22	15.19	49.46	8.96		5b	Bitter	131.01	56.62	45.34	129.4	152.23	0.98
5b	sweet	81.57	115.93	73.49	122.53	94.87	1.17		5b	Bitter	23.34	0.07	46.37	109.52	165.26	5.22
5b	sweet	22.83	180.22	31.19	169.1	30.56	3.11		5b	Bitter	77.64	4.78	196.33	342.46	336.72	1.79
5b	sweet	80.94	31.23	332.91	32.53	64.52	2.33		5b	Bitter	17.26	2.18	75.47	123.78	310.43	3.38
5b	sweet	50.59	425.02	26.87	191.72	51.48	8.4		5b	Bitter	21.41	0.84	390.16	178.64	157.55	-0.04
5b	sweet	49.28	31.96	119.92	38.36	122.74	1.07		5b	Bitter	65.51	5.2	153.37	61.89	55.46	-1.03
5b	sweet	32.83	126.07	114.42	142.68	29.18	3.87		5b	Bitter	18.13	310.97	50.16	121.93	59.52	0.83
5b	sweet	47.24	48.45	321.6	34.9	143.67	-6.34		5b	Bitter	10	328.54	90.1	299.66	130.69	7.24
5b	sweet	4.25	110.32	157.13	63.8	42.95	2.88		5b	Bitter	21.07	72.93	20.07	26.98	232.73	2.19
5b	sweet	49.91	55.49	53.67	67.04	86.86	10.85		5b	Bitter	2.87	114.91	387.89	120.85	204.8	0.52
5b	sweet	16.62	212.68	126.59	140.55	322.82			5b	Bitter	30.87	216.28	47.06	126.49	67.59	2.98
5b	sweet	4.93	54.98	112.16	89.86	22.34			5b	Bitter	25.12	27.68	136.59	89.93	71.9	3.08
5b	sweet	29.12	106.43	28.86	32.18	22.12			5b	Bitter	34.75	22.07	19.63	188.71	148.66	3.77
5b	sweet	5.41	46.9	122.02	52.43	44.65			5b	Bitter	4.22	82.52		105.26	371.71	1.08
5b	sweet	8.34	181.39	216.67	21.72	65.1			5b	Bitter		28.44		206.05	213.5	0.19
5b	sweet		60.3		118.33	54.56			5b	Bitter		134.41		255.65	78.51	7.26
5b	sweet		34.21		27.9	86.19			5b	Bitter		72.81		50.44	190.33	2.63
5b	sweet		33.38		64.55	54.25			5b	Bitter		33.53		141.69	325.06	2.09
5b	sweet				57.45	64.26			5b	Bitter		36.33		255.36	330.17	12.24
5b	sweet				57.91	46.87			5b	Bitter		39.33		87.59	176.15	6.43
5b	sweet					263.09			5b	Bitter		66.23		40.8	529.12	8.74
5b	sweet					146.55			5b	Bitter		218.17		499.17	651.59
5b	sweet					46.77			5b	Bitter		118.36		295.94	326.28
5b	sweet					29.04			5b	Bitter		175.21		208.55	273.46
5b	sweet					101.4			5b	Bitter		7.62		236.69	357.8
5b	sweet					101.41			5b	Bitter		65.32		179.83	246.84
5b	sweet					37.16			5b	Bitter					347.48
5b	sweet					70.57			5b	Bitter					301.71
5b	sweet					175.83			5b	Bitter					180.08
5b	sweet					158.4			5b	Bitter					325.37
5b	sweet					43.2			5b	Bitter					250.95
5b	sweet					218.3			5b	Bitter					43.64
5b	sweet					160.81			5b	Bitter					209.79
5b	sweet					184.46			5b	Bitter					383.26
5b	sweet					126.88			5b	Bitter					253.32
5b	sweet					134.32			5b	Bitter					81.11
5b	sweet					64.6			5b	Bitter					112.12
5b	sweet					64.06			5b	Bitter					509.69
5b	sweet					232.69			5b	Bitter					330.14
5b	sweet					178.33			5b	Bitter					744.36
									5b	Bitter					119.77
									5b	Bitter					4.23
									5b	Bitter					63.49
									5b	Bitter					55.97
									5b	Bitter					83.37
									5b	Bitter					5.74
									5b	Bitter					101.35
									5b	Bitter					3.36
									5b	Bitter					29.2
									5b	Bitter					42.45
									5b	Bitter					71.06
									5b	Bitter					161.39
									5b	Bitter					45.49
									5b	Bitter					204.5
									5b	Bitter					190.07
									5b	Bitter					34.31

## Sheet: Figure 7(B)
Figure 7-Source Data 1.
(B) PER responses of wild-type flies (w1118) to different dosages of hexanoic acid.
Genotype	0.1% Hexanoic acid	0.5% Hexanoic acid	1% Hexanoic acid	2.5% Hexanoic acid	100 mM Sucrose
w1118	66.66	33.33	0	0	66.66
w1118	66.66	100	100	66.66	33.33
w1118	33.33	0	0	0	0
w1118	66.66	0	66.66	33.33	100
w1118	66.66	33.33	100	0	33.33
w1118	66.66	33.33	66.66	33.33	66.66
w1118	33.33	66.66	0	0	33.33
w1118	0	33.33	0	0	66.66
w1118	33.33	0	0	0	66.66
w1118	33.33	33.33	100	33.33	0
w1118	33.33	0	0	0	33.33
w1118	33.33	0	0	0	66.66
w1118	100	100	33.33	33.33	66.66
w1118	66.66	100	0	33.33	0
w1118	100	33.33	0	0	100
w1118	100	33.33	0	0	0
w1118	33.33	66.66	100	0	66.66
w1118	0	33.33	100	0	33.33
w1118	66.66	100	100	66.66	100
w1118	0	100	33.33	0	33.33
w1118	100	66.66	66.66	100	100
w1118	0	0	33.33	66.66	66.66
w1118	0	100	33.33	33.33	66.66
w1118	0	0	66.66	0	33.33
w1118	33.33	66.66	100	33.33	100
w1118	33.33	0	100	0	100
w1118	0	66.66	0	33.33	100
w1118	33.33	66.66	0	0	100
w1118	33.33	33.33	0	0	66.66
w1118	0	0	0	0	100
w1118	0	33.33	33.33	0	100
w1118	33.33	0	33.33	0	0
w1118	0	0	66.66	33.33	66.66
w1118	33.33	0	0	0	66.66
w1118	0	33.33	0	0	0
w1118	33.33	33.33	33.33	0	33.33
w1118	0	66.66	33.33	0	66.66
w1118	33.33	66.66	100	33.33	33.33
w1118	0	0	0	0	100
w1118	0	33.33	0	0	66.66
w1118	0	66.66	0	0	33.33
w1118	0	0	33.33	0	66.66
w1118	0	0	0	66.66	66.66
w1118	33.33	33.33	33.33	100	100
w1118	66.66	66.66	66.66	33.33	33.33
w1118	0	33.33	0	0	0
w1118	100	100	33.33	0	33.33
w1118	33.33	66.66	66.66	33.33	66.66
w1118	0	33.33	0	33.33	66.66
w1118	33.33	33.33	66.66	33.33	0
w1118	0	0	0	0	100
w1118	0	66.66	0	0	66.66
w1118	0	0	0	0	100
w1118	0	66.66	100	0	100
w1118	66.66	100	100	0	100
w1118	0	66.66	100	33.33	100
w1118	0	66.66	33.33	33.33	100
w1118	0	0	0	0	100
w1118	66.66	0	66.66	33.33	33.33
w1118	0	33.33	0	66.66	33.33
w1118	0	100	0	0	33.33
w1118	33.33	66.66	0		33.33
w1118	33.33	33.33	33.33		66.66
w1118	33.33	33.33	66.66		33.33
w1118	0	33.33	0		100
w1118	0	66.66	100		0
w1118	0	0	33.33		66.66
w1118	0	0	33.33		33.33
w1118	0	0	100		66.66
w1118	0	33.33	0		66.66
w1118	0	100	66.66		100
w1118	0	100	33.33		33.33
w1118	66.66	66.66	100		33.33
w1118	0	33.33	33.33		100
w1118	0	33.33	0		66.66
w1118	0	100	33.33		66.66
w1118	0	0	0		100
w1118	0	33.33	0		66.66
w1118	0	0	33.33		33.33
w1118	33.33	0	33.33		0
w1118	33.33	66.66	100		33.33
w1118			66.66		66.66
w1118			100		33.33
w1118			66.66		33.33
w1118			66.66		33.33
w1118					33.33
w1118					66.66
w1118					0
w1118					100
w1118					0
w1118					33.33
w1118					66.66
w1118					66.66
w1118					33.33
w1118					33.33
w1118					100
w1118					66.66
w1118					100
w1118					0
w1118					100
w1118					66.66
w1118					100
w1118					33.33
w1118					100
w1118					33.33
w1118					33.33
w1118					33.33
w1118					33.33
w1118					66.66
w1118					66.66
w1118					33.33
w1118					33.33
w1118					66.66
w1118					0
w1118					100
w1118					0
w1118					100
w1118					0
w1118					100
w1118					33.33
w1118					0
w1118					0
w1118					100
w1118					66.66
w1118					100
w1118					100
w1118					66.66
w1118					100
w1118					100
w1118					100
w1118					66.66
w1118					66.66
w1118					100
w1118					33.33
w1118					100
w1118					100
w1118					100
w1118					100
w1118					100
w1118					66.66
w1118					66.66
w1118					0

## Sheet: Figure 7(C)
Figure 7-Source Data 1.
(C) PER responses of flies to different dosages of hexanoic acid when bitter GRNs are inactivated by expression of UAS-TNT.
Sample Name	0.1% Hexanoic acid	0.5% Hexanoic acid	1% Hexanoic acid	2.5% Hexanoic acid	100 mM Sucrose		Sample Name	0.1% Hexanoic acid	0.5% Hexanoic acid	1% Hexanoic acid	2.5% Hexanoic acid	100 mM Sucrose		Sample Name	0.1% Hexanoic acid	0.5% Hexanoic acid	1% Hexanoic acid	2.5% Hexanoic acid	100 mM Sucrose
Gr33aGAL4 alone	0	0	0	0	33.33		UAS-TNT alone	0	0	66.66	100	66.66		Gr33aGAL4/UAS-TNT	0	0	0	0	33.33
Gr33aGAL4 alone	0	0	0	33.33	66.66		UAS-TNT alone	0	66.66	33.33	0	100		Gr33aGAL4/UAS-TNT	0	33.33	0	0	66.66
Gr33aGAL4 alone	0	0	33.33	0	100		UAS-TNT alone	0	0	100	0	66.66		Gr33aGAL4/UAS-TNT	33.33	33.33	0	0	33.33
Gr33aGAL4 alone	66.66	0	0	33.33	0		UAS-TNT alone	0	33.33	33.33	100	100		Gr33aGAL4/UAS-TNT	0	0	0	0	33.33
Gr33aGAL4 alone	0	0	66.66	0	100		UAS-TNT alone	0	33.33	0	0	66.66		Gr33aGAL4/UAS-TNT	0	66.66	66.66	0	66.66
Gr33aGAL4 alone	66.66	66.66	0	0	100		UAS-TNT alone	0	0	33.33	0	0		Gr33aGAL4/UAS-TNT	33.33	0	0	33.33	0
Gr33aGAL4 alone	0	0	0	0	66.66		UAS-TNT alone	0	0	0	0	33.33		Gr33aGAL4/UAS-TNT	0	66.66	100	100	100
Gr33aGAL4 alone	100	100	0	0	33.33		UAS-TNT alone	0	100	0	0	100		Gr33aGAL4/UAS-TNT	0	0	66.66	66.66	100
Gr33aGAL4 alone	0	0	0	0	33.33		UAS-TNT alone	0	0	66.66	66.66	100		Gr33aGAL4/UAS-TNT	66.66	66.66	100	100	100
Gr33aGAL4 alone	0	0	66.66	0	100		UAS-TNT alone	0	100	66.66	0	66.66		Gr33aGAL4/UAS-TNT	0	33.33	66.66	66.66	100
Gr33aGAL4 alone	66.66	33.33	0	0	0		UAS-TNT alone	0	33.33	0	0	33.33		Gr33aGAL4/UAS-TNT	100	100	100	100	100
Gr33aGAL4 alone	0	0	0	0	66.66		UAS-TNT alone	100	66.66	0	0	0		Gr33aGAL4/UAS-TNT	66.66	100	0	0	33.33
Gr33aGAL4 alone	33.33	0	0	0	66.66		UAS-TNT alone	0	0	66.66	100	33.33		Gr33aGAL4/UAS-TNT	0	0	0	33.33	100
Gr33aGAL4 alone	0	33.33	0	0	100		UAS-TNT alone	33.33	0	33.33	33.33	100		Gr33aGAL4/UAS-TNT	0	0	0	0	0
Gr33aGAL4 alone	0	33.33	100	100	100		UAS-TNT alone	0	0	33.33	0	0		Gr33aGAL4/UAS-TNT	66.66	0	0	0	0
Gr33aGAL4 alone	66.66	0	33.33	0	33.33		UAS-TNT alone	33.33	0	33.33	33.33	100		Gr33aGAL4/UAS-TNT	0	0	0	33.33	33.33
Gr33aGAL4 alone	0	33.33	66.66	33.33	100		UAS-TNT alone	0	0	33.33	33.33	33.33		Gr33aGAL4/UAS-TNT	0	0	100	100	100
Gr33aGAL4 alone	100	100	33.33	0	33.33		UAS-TNT alone	33.33	0	33.33	33.33	100		Gr33aGAL4/UAS-TNT	0	0	66.66	100	100
Gr33aGAL4 alone	100	100	0	0	100		UAS-TNT alone	0	0	0	0	0		Gr33aGAL4/UAS-TNT	66.66	0	33.33	0	66.66
Gr33aGAL4 alone	66.66	0	100	33.33	100		UAS-TNT alone	0	0	0	0	100		Gr33aGAL4/UAS-TNT	0	33.33	0	33.33	66.66
Gr33aGAL4 alone	0	0	33.33	0	100		UAS-TNT alone	0	100	33.33	0	100		Gr33aGAL4/UAS-TNT	0	0	33.33	100	100
Gr33aGAL4 alone	0	0	33.33	0	100		UAS-TNT alone	33.33	0	66.66	66.66	100		Gr33aGAL4/UAS-TNT	0	0	100	66.66	100
Gr33aGAL4 alone	0	66.66	66.66	33.33	100		UAS-TNT alone	33.33	33.33	66.66	0	100		Gr33aGAL4/UAS-TNT	0	0	66.66	0	0
Gr33aGAL4 alone	0	0	0	0	100		UAS-TNT alone			0	33.33	33.33		Gr33aGAL4/UAS-TNT	100	66.66	66.66	100	33.33
Gr33aGAL4 alone	0	0	0	0	100		UAS-TNT alone			0	0	33.33		Gr33aGAL4/UAS-TNT	0	66.66	33.33	0	100
Gr33aGAL4 alone	66.66	100	0	0	100		UAS-TNT alone			66.66	0	100		Gr33aGAL4/UAS-TNT	33.33	0	100	66.66	100
Gr33aGAL4 alone	100	0	0	0	0		UAS-TNT alone			0	0	66.66		Gr33aGAL4/UAS-TNT	0	66.66	0	0	0
Gr33aGAL4 alone	0	66.66	33.33	0	66.66		UAS-TNT alone			33.33	0	0		Gr33aGAL4/UAS-TNT	100	66.66	0	66.66	66.66
Gr33aGAL4 alone	66.66	100	0	0	33.33		UAS-TNT alone			0	0	66.66		Gr33aGAL4/UAS-TNT	66.66	100	100	100	100
Gr33aGAL4 alone	0	100	33.33	33.33	100		UAS-TNT alone			0	0	100		Gr33aGAL4/UAS-TNT	66.66	66.66	0	0	0
Gr33aGAL4 alone	0	100	0	0	66.66		UAS-TNT alone			33.33	100	100		Gr33aGAL4/UAS-TNT	0	66.66	100	100	100
Gr33aGAL4 alone	0	0	66.66	0	66.66		UAS-TNT alone			33.33	0	66.66		Gr33aGAL4/UAS-TNT	0	0	0	0	33.33
Gr33aGAL4 alone	0	0	66.66	100	100		UAS-TNT alone			0	0	66.66		Gr33aGAL4/UAS-TNT	0	0	66.66	0	100
Gr33aGAL4 alone	33.33	0	66.66	0	100		UAS-TNT alone			33.33	0	33.33		Gr33aGAL4/UAS-TNT	100	66.66	100	33.33	100
Gr33aGAL4 alone	0	33.33	33.33	66.66	100		UAS-TNT alone			33.33	0	66.66		Gr33aGAL4/UAS-TNT			100	100	100
Gr33aGAL4 alone	0	0	0	0	100		UAS-TNT alone			33.33	0	66.66		Gr33aGAL4/UAS-TNT			0	33.33	33.33
Gr33aGAL4 alone	0	33.33	0	0	66.66		UAS-TNT alone			33.33	33.33	66.66		Gr33aGAL4/UAS-TNT			0	0	66.66
Gr33aGAL4 alone	0	33.33	33.33	0	100		UAS-TNT alone			100	0	100		Gr33aGAL4/UAS-TNT			100	100	100
Gr33aGAL4 alone	33.33	66.66	0	0	100		UAS-TNT alone			0	0	33.33		Gr33aGAL4/UAS-TNT			66.66	33.33	100
Gr33aGAL4 alone	0	0	33.33	0	100		UAS-TNT alone			0	0	100		Gr33aGAL4/UAS-TNT			66.66	0	100
Gr33aGAL4 alone	0	33.33	0	0	100		UAS-TNT alone			0	0	0		Gr33aGAL4/UAS-TNT			33.33	66.66	100
Gr33aGAL4 alone	0	66.66	100	100	100		UAS-TNT alone			66.66	66.66	100		Gr33aGAL4/UAS-TNT			33.33	0	100
Gr33aGAL4 alone	66.66	100	100	100	100		UAS-TNT alone			0	0	66.66		Gr33aGAL4/UAS-TNT			66.66	100	100
Gr33aGAL4 alone			0	0	100		UAS-TNT alone			100	0	100		Gr33aGAL4/UAS-TNT			0	0	100
Gr33aGAL4 alone			0	33.33	66.66		UAS-TNT alone			100	100	100		Gr33aGAL4/UAS-TNT			33.33	66.66	100
Gr33aGAL4 alone			100	100	100		UAS-TNT alone			100	0	100		Gr33aGAL4/UAS-TNT			0	33.33	100
Gr33aGAL4 alone			100	100	100		UAS-TNT alone			0	0	33.33		Gr33aGAL4/UAS-TNT			66.66	0	100
Gr33aGAL4 alone			33.33	33.33	100		UAS-TNT alone			66.66	33.33	66.66		Gr33aGAL4/UAS-TNT			0	0	33.33
Gr33aGAL4 alone			100	66.66	100		UAS-TNT alone			0	0	100		Gr33aGAL4/UAS-TNT			0	0	66.66
Gr33aGAL4 alone			0	33.33	100		UAS-TNT alone			0	0	66.66		Gr33aGAL4/UAS-TNT			33.33	33.33	100
Gr33aGAL4 alone			100	100	100		UAS-TNT alone			33.33	33.33	100		Gr33aGAL4/UAS-TNT			66.66	33.33	100
Gr33aGAL4 alone			33.33	0	100		UAS-TNT alone			33.33	100	0		Gr33aGAL4/UAS-TNT			100	100	100
Gr33aGAL4 alone			66.66	100	100		UAS-TNT alone			0	0	0		Gr33aGAL4/UAS-TNT			0	33.33	100
Gr33aGAL4 alone			33.33	100	100		UAS-TNT alone			100	33.33	100		Gr33aGAL4/UAS-TNT			0	0	100
Gr33aGAL4 alone			0	33.33	100		UAS-TNT alone			66.66	33.33	100		Gr33aGAL4/UAS-TNT			0	33.33	100
Gr33aGAL4 alone			0	0	100		UAS-TNT alone			0	0	66.66		Gr33aGAL4/UAS-TNT			0	0	0
Gr33aGAL4 alone			0	0	100		UAS-TNT alone			0	0	0		Gr33aGAL4/UAS-TNT			0	0	0
Gr33aGAL4 alone			33.33	0	100		UAS-TNT alone			66.66	0	100		Gr33aGAL4/UAS-TNT			66.66	33.33	100
Gr33aGAL4 alone			0	0	33.33		UAS-TNT alone			0	0	33.33		Gr33aGAL4/UAS-TNT			0	33.33	100
Gr33aGAL4 alone			0	0	33.33		UAS-TNT alone			0	0	66.66		Gr33aGAL4/UAS-TNT			33.33	0	0
Gr33aGAL4 alone			0	0	100		UAS-TNT alone			33.33	0	0		Gr33aGAL4/UAS-TNT			0	0	100
Gr33aGAL4 alone			0	0	100		UAS-TNT alone			33.33	0	66.66		Gr33aGAL4/UAS-TNT			100	66.66	100
Gr33aGAL4 alone			100	66.66	100		UAS-TNT alone			0	0	33.33		Gr33aGAL4/UAS-TNT			100	66.66	100
Gr33aGAL4 alone			0	0	66.66		UAS-TNT alone			33.33	0	100		Gr33aGAL4/UAS-TNT			33.33	66.66	100
Gr33aGAL4 alone			33.33	66.66	100		UAS-TNT alone			0	0	66.66		Gr33aGAL4/UAS-TNT			66.66	66.66	100
Gr33aGAL4 alone			0	0	100		UAS-TNT alone			100	0	100		Gr33aGAL4/UAS-TNT			0	0	100
Gr33aGAL4 alone			0	0	100		UAS-TNT alone			0	0	66.66		Gr33aGAL4/UAS-TNT			33.33	0	100
Gr33aGAL4 alone			100	0	100		UAS-TNT alone			0	0	100		Gr33aGAL4/UAS-TNT					0
Gr33aGAL4 alone			0	0	0		UAS-TNT alone					66.66		Gr33aGAL4/UAS-TNT					100
Gr33aGAL4 alone			0	0	100		UAS-TNT alone					66.66		Gr33aGAL4/UAS-TNT					66.66
Gr33aGAL4 alone			0	0	33.33		UAS-TNT alone					0		Gr33aGAL4/UAS-TNT					100
Gr33aGAL4 alone			0	0	0		UAS-TNT alone					33.33		Gr33aGAL4/UAS-TNT					66.66
Gr33aGAL4 alone			33.33	0	100		UAS-TNT alone					66.66		Gr33aGAL4/UAS-TNT					0
Gr33aGAL4 alone			0	0	100		UAS-TNT alone					33.33		Gr33aGAL4/UAS-TNT					100
Gr33aGAL4 alone			66.66	0	100		UAS-TNT alone					100		Gr33aGAL4/UAS-TNT					100
Gr33aGAL4 alone			33.33	0	100		UAS-TNT alone					33.33		Gr33aGAL4/UAS-TNT					100
Gr33aGAL4 alone			33.33	0	100		UAS-TNT alone					33.33		Gr33aGAL4/UAS-TNT					100
Gr33aGAL4 alone			0	0	0		UAS-TNT alone					66.66		Gr33aGAL4/UAS-TNT					100
Gr33aGAL4 alone			0		0		UAS-TNT alone					66.66		Gr33aGAL4/UAS-TNT					100
Gr33aGAL4 alone			0		33.33		UAS-TNT alone					100		Gr33aGAL4/UAS-TNT					66.66
Gr33aGAL4 alone			0		100		UAS-TNT alone					100		Gr33aGAL4/UAS-TNT					33.33
Gr33aGAL4 alone			0		100		UAS-TNT alone					100		Gr33aGAL4/UAS-TNT					100
Gr33aGAL4 alone			0		100		UAS-TNT alone					33.33		Gr33aGAL4/UAS-TNT					0
Gr33aGAL4 alone			0		100		UAS-TNT alone					0		Gr33aGAL4/UAS-TNT					66.66
Gr33aGAL4 alone			100		100		UAS-TNT alone					33.33		Gr33aGAL4/UAS-TNT					100
Gr33aGAL4 alone			0		66.66		UAS-TNT alone					33.33		Gr33aGAL4/UAS-TNT					66.66
Gr33aGAL4 alone			0		100		UAS-TNT alone					66.66		Gr33aGAL4/UAS-TNT					66.66
Gr33aGAL4 alone			0		0		UAS-TNT alone					66.66		Gr33aGAL4/UAS-TNT					33.33
Gr33aGAL4 alone			0		100		UAS-TNT alone					33.33		Gr33aGAL4/UAS-TNT					33.33
Gr33aGAL4 alone			0		33.33		UAS-TNT alone					33.33		Gr33aGAL4/UAS-TNT					66.66
Gr33aGAL4 alone			66.66		100		UAS-TNT alone					33.33		Gr33aGAL4/UAS-TNT					100
Gr33aGAL4 alone			33.33		100									Gr33aGAL4/UAS-TNT					100
Gr33aGAL4 alone			0		100									Gr33aGAL4/UAS-TNT					100
Gr33aGAL4 alone			0		100									Gr33aGAL4/UAS-TNT					100
Gr33aGAL4 alone			0		100									Gr33aGAL4/UAS-TNT					100
Gr33aGAL4 alone			0		100									Gr33aGAL4/UAS-TNT					100
Gr33aGAL4 alone			0		100									Gr33aGAL4/UAS-TNT					100
Gr33aGAL4 alone			0		100									Gr33aGAL4/UAS-TNT					100
Gr33aGAL4 alone					100									Gr33aGAL4/UAS-TNT					100
Gr33aGAL4 alone					100									Gr33aGAL4/UAS-TNT					100
Gr33aGAL4 alone					100									Gr33aGAL4/UAS-TNT					100
Gr33aGAL4 alone					66.66
Gr33aGAL4 alone					0
Gr33aGAL4 alone					100
Gr33aGAL4 alone					100
Gr33aGAL4 alone					100
Gr33aGAL4 alone					100
Gr33aGAL4 alone					100
Gr33aGAL4 alone					100
Gr33aGAL4 alone					100
Gr33aGAL4 alone					100
Gr33aGAL4 alone					66.66
Gr33aGAL4 alone					66.66
Gr33aGAL4 alone					33.33
Gr33aGAL4 alone					66.66
Gr33aGAL4 alone					100
Gr33aGAL4 alone					100
Gr33aGAL4 alone					100
Gr33aGAL4 alone					33.33
Gr33aGAL4 alone					33.33
Gr33aGAL4 alone					100

## Sheet: Figure 7(D)
Figure 7-Source Data1.
(D) Ca2+ responses of sweet GRNs associated with 5b or 5s sensilla to different dosages of hexanoic acid when bitter GRNs are inactivated by expression of UAS-TNT.
Sensilla	Sample Name	0.1% Hexanoic acid	0.5% Hexanoic acid	2.5% Hexanoic acid	10 mM Sucrose		Sensilla	Sample Name	0.1% Hexanoic acid	0.5% Hexanoic acid	2.5% Hexanoic acid	10 mM Sucrose		Sensilla	Sample Name	0.1% Hexanoic acid	0.5% Hexanoic acid	2.5% Hexanoic acid	10 mM Sucrose		Sensilla	Sample Name	0.1% Hexanoic acid	0.5% Hexanoic acid	2.5% Hexanoic acid	10 mM Sucrose
5b	Control	-4.12	12.06	2.75	38.15		5b	Gr33a>TNT	135.2	100.9	389.93	78.67		5s	Control	12.48	52.47	6.61	40.88		5s	Gr33a>TNT	22.41	144.68	182.07	125.89
5b	Control	9.59	16.02	5.28	30.82		5b	Gr33a>TNT	17.1	72.8	75.46	36.29		5s	Control	3.65	52.55	6.99	79.28		5s	Gr33a>TNT	7.79	38.99	89.43	67.86
5b	Control	17.2			27.47		5b	Gr33a>TNT	75.06	201.18	143.03	54.98		5s	Control	1.42			156.11		5s	Gr33a>TNT	11.2	7.83	13.38	38.67
5b	Control	18.12	5.89	29.04	145.28		5b	Gr33a>TNT	8.12	125.98	7.37	122.15		5s	Control	36.03	16.53	10.88	153.98		5s	Gr33a>TNT	59.53	-5.16	81.45	86.54
5b	Control	3.17	8.02	0.84	33.23		5b	Gr33a>TNT	26.69	-2.48	1.12	25.46		5s	Control	10.18	5.81	1.69	78.6		5s	Gr33a>TNT	11.38	83.99	61.07	137.03
5b	Control	48.93	146.42	11.17	72.83		5b	Gr33a>TNT	78.09	14.27	6.31	85.25		5s	Control	27.16	26.38	21.15	52.21		5s	Gr33a>TNT	39.01	12.37	6.61	65.4
5b	Control	158.57	54.17	182.45	16.92		5b	Gr33a>TNT	7.94	39.62	41.12	91.66		5s	Control	61.06	54.75	139.82	37.66		5s	Gr33a>TNT	19.9	9.92	20.02	85.69
5b	Control	85.73	62.9	23.98	57.29		5b	Gr33a>TNT	14.34	37.65	34.45	33.67		5s	Control	31.69	22.34	19.26	114.59		5s	Gr33a>TNT	41.15	45.26	87.79	55.93
5b	Control	3.1	133.04	88.12	12.77		5b	Gr33a>TNT	9.19	131.02	131.95	15.57		5s	Control	42.29			67.29		5s	Gr33a>TNT	73.3	76.79	88.41	124.38
5b	Control	6.09	86.04	64.31	116.24		5b	Gr33a>TNT	43.2	56.97	54.32	15.33		5s	Control	18.98	19.49	57.93	99.32		5s	Gr33a>TNT	32.15	54.17	33.4	29.36
5b	Control	32.44	54.24	104.26	48.94		5b	Gr33a>TNT	77.47	85.21	20.39	7.43		5s	Control			114.08	151.55		5s	Gr33a>TNT	16.68	60.28	58.49	34.76
5b	Control	148.27	57.24	92.42	123.74		5b	Gr33a>TNT	61.15	34.34	9.59	88.87		5s	Control	53.49	16.56	33.66	63.87		5s	Gr33a>TNT	9	40.56	126.68	53.33
5b	Control	5.4	29.64	261.33	66.68		5b	Gr33a>TNT	64.31	114.17	68.63	49.81		5s	Control	7.29	15.92	139.35	72		5s	Gr33a>TNT	35.83	115.26	46.87	35.47
																					5s	Gr33a>TNT	31.44	7.08	16.1	42.31
																					5s	Gr33a>TNT	7.03	26.29	45.86	69.56
