# Supplementary figures and images for: Molecular basis of fatty acid taste in Drosophila
Source: eLife journal article supplement (doi:10.7554/elife.30115), 2017-12-12

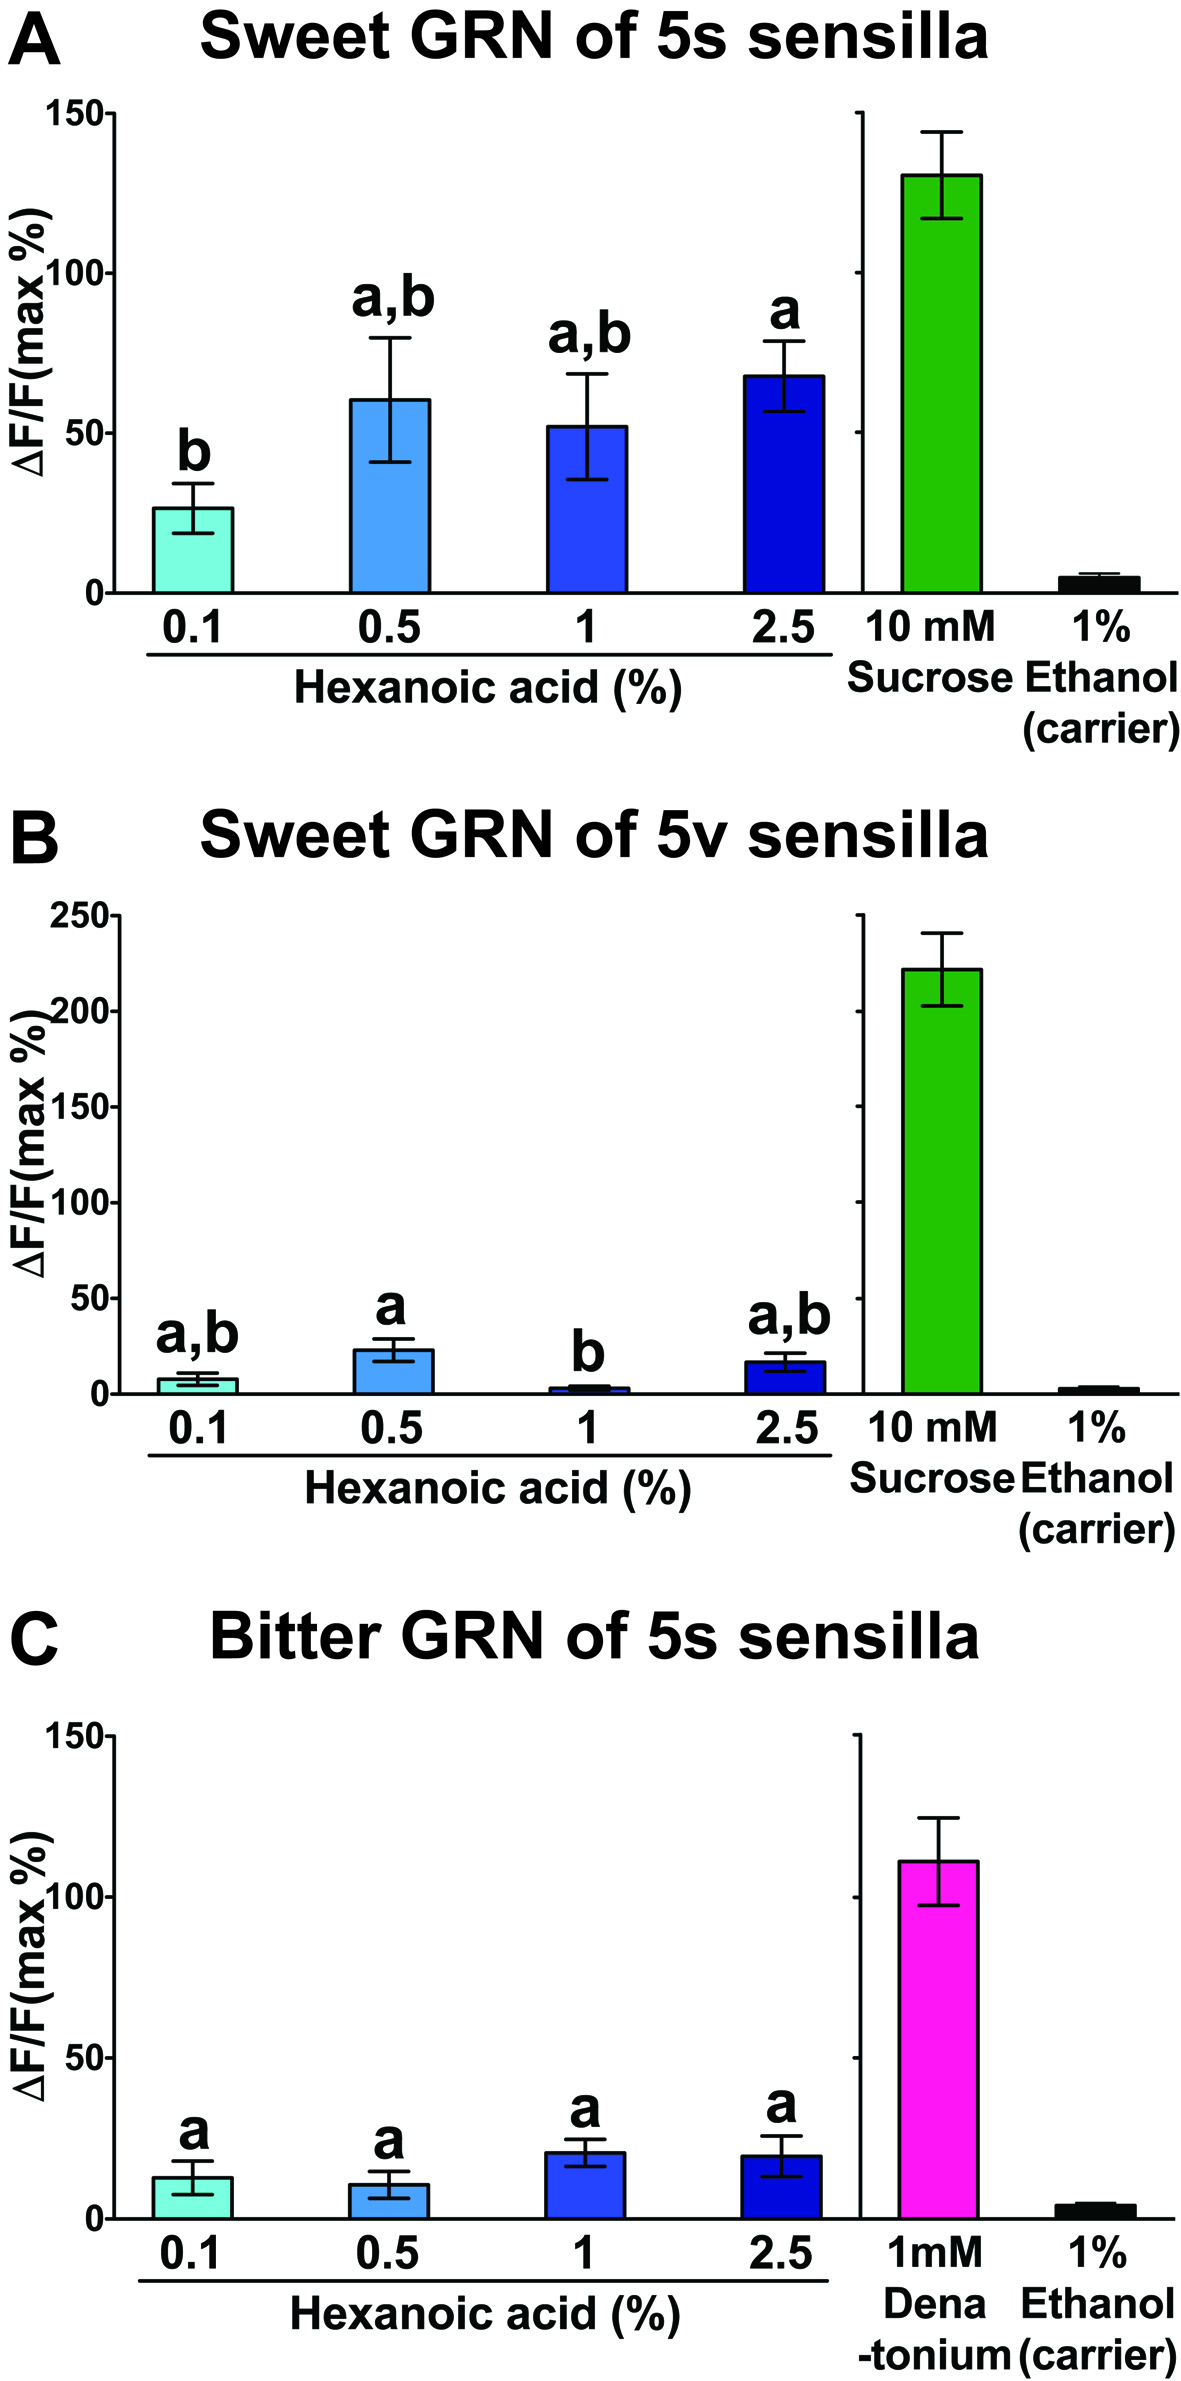

Supplement: supp [file elife-30115-supp-v1.zip › elife_poa_e30115_Figure_7_figure_supplement_1.tif]

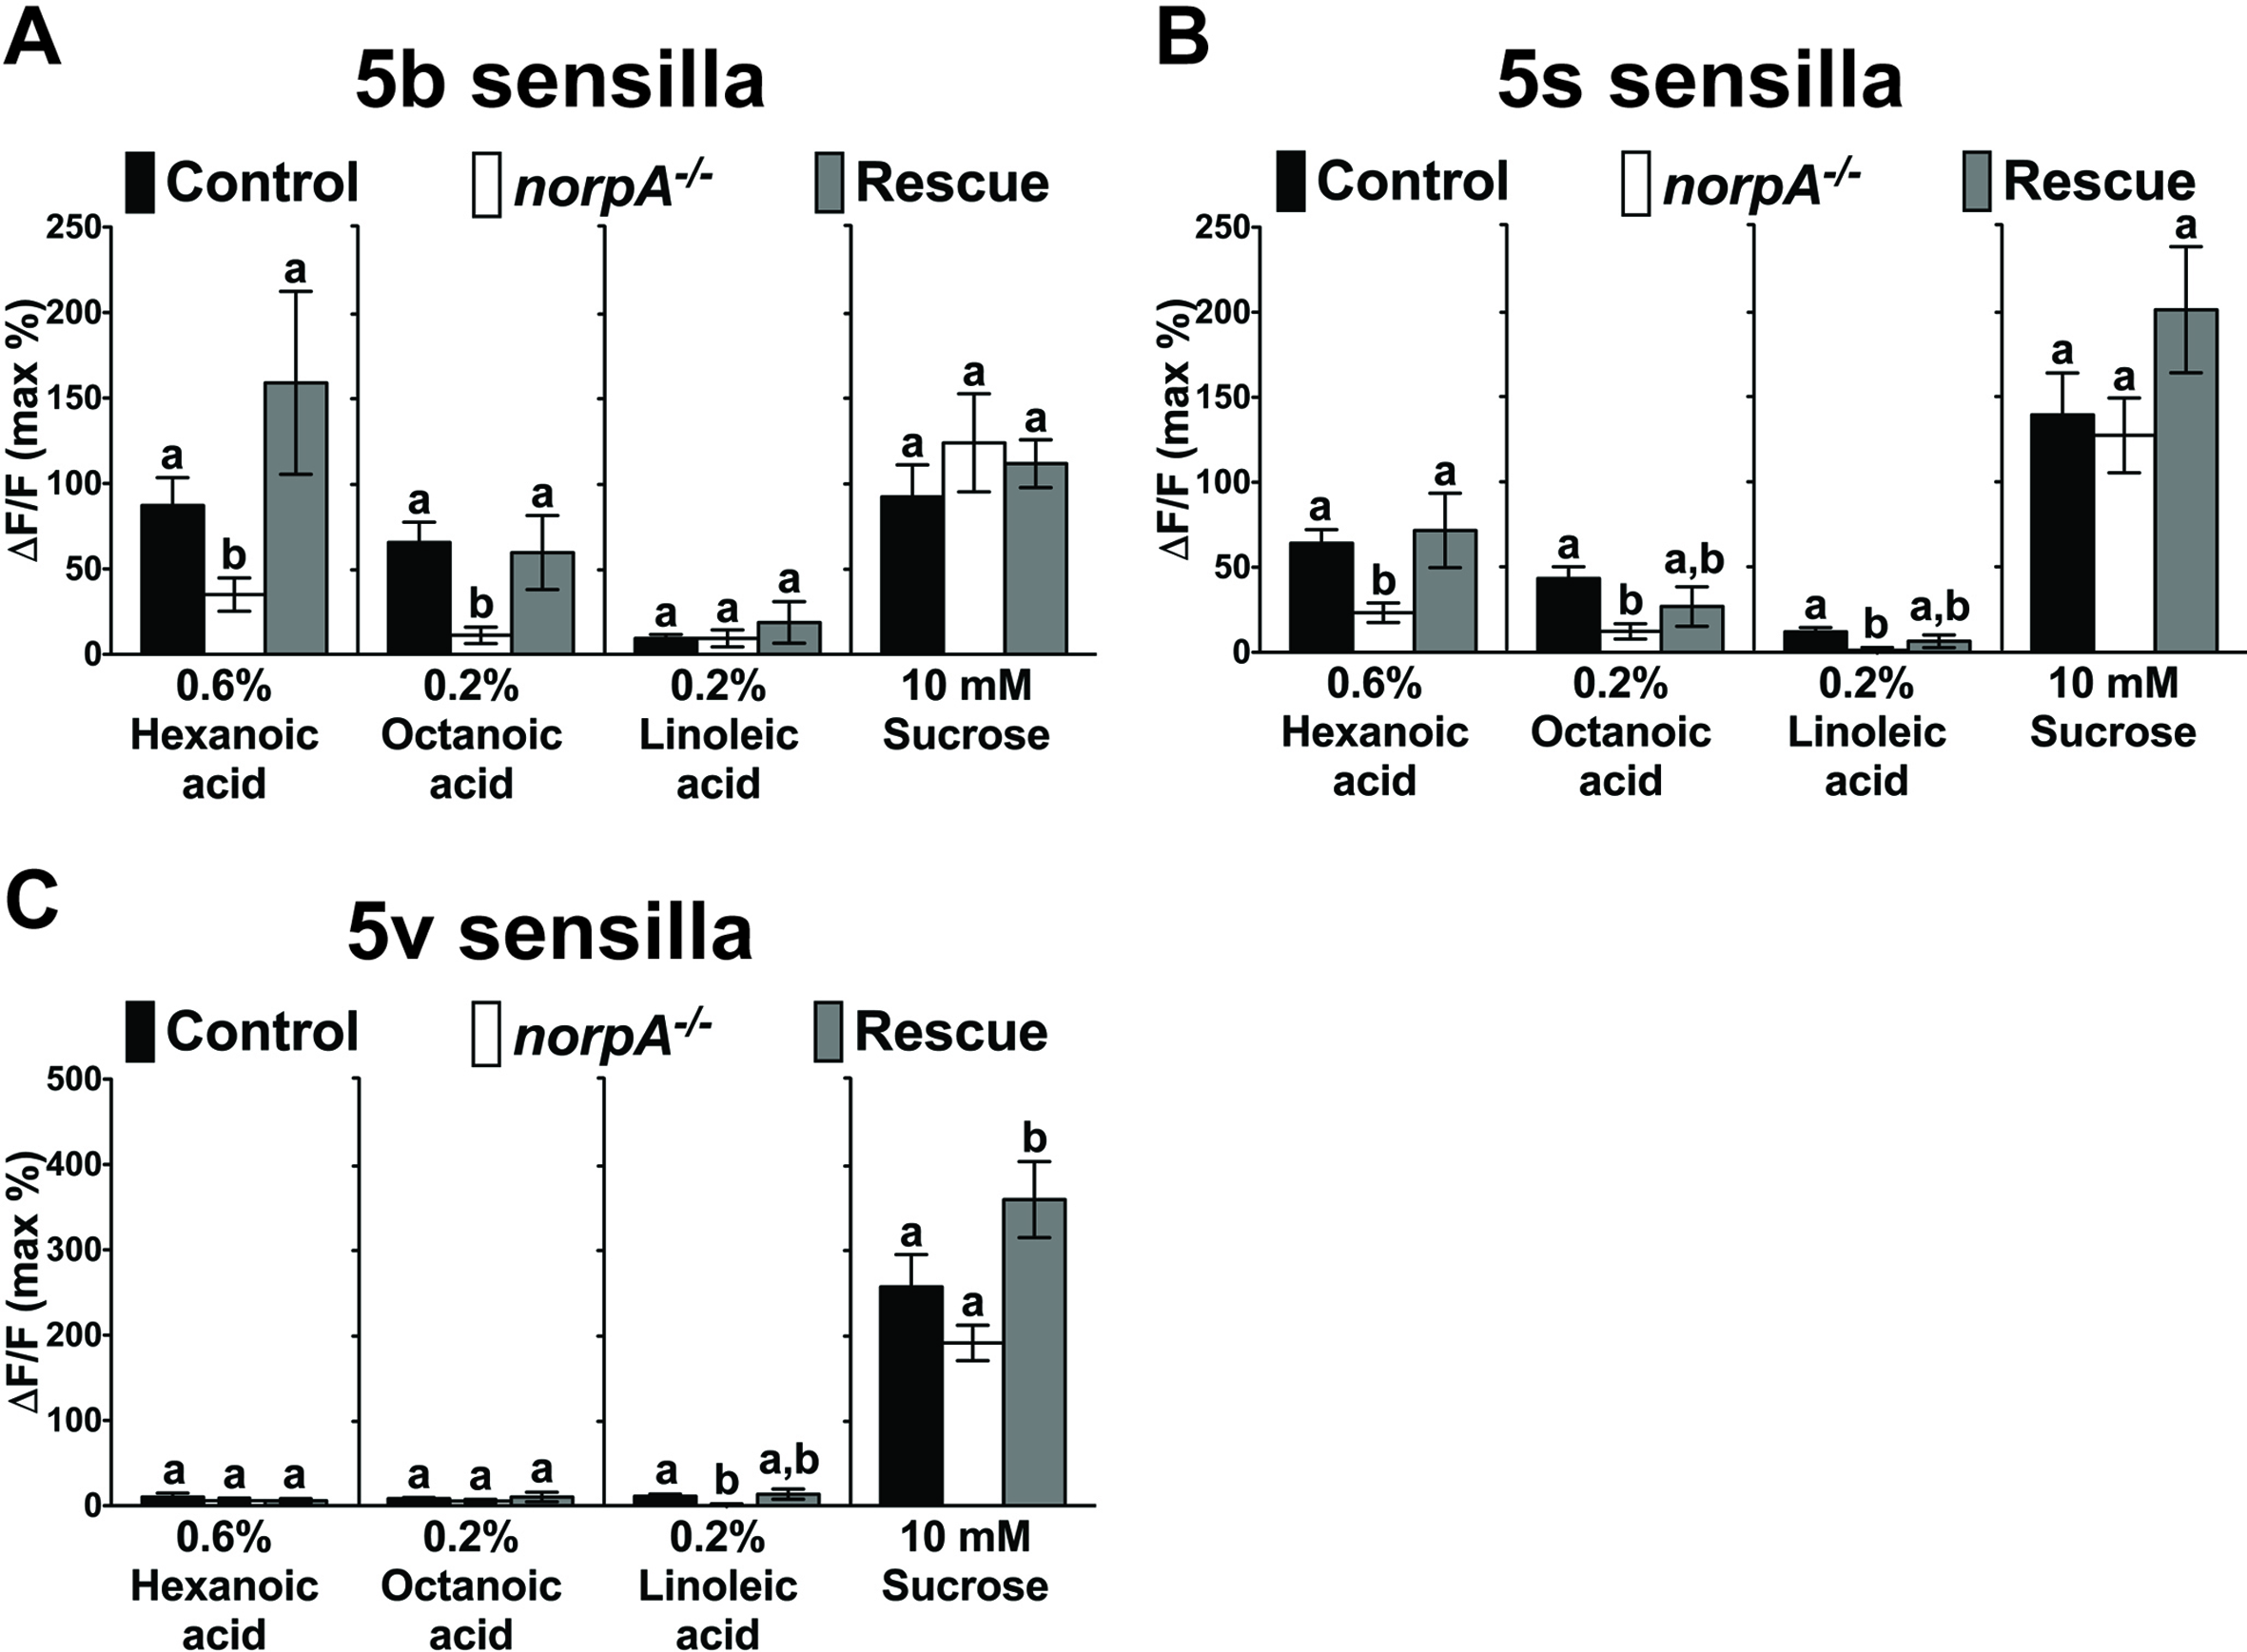

Supplement: supp [file elife-30115-supp-v1.zip › elife_poa_e30115_Figure_1_figure_supplement_2.tif]

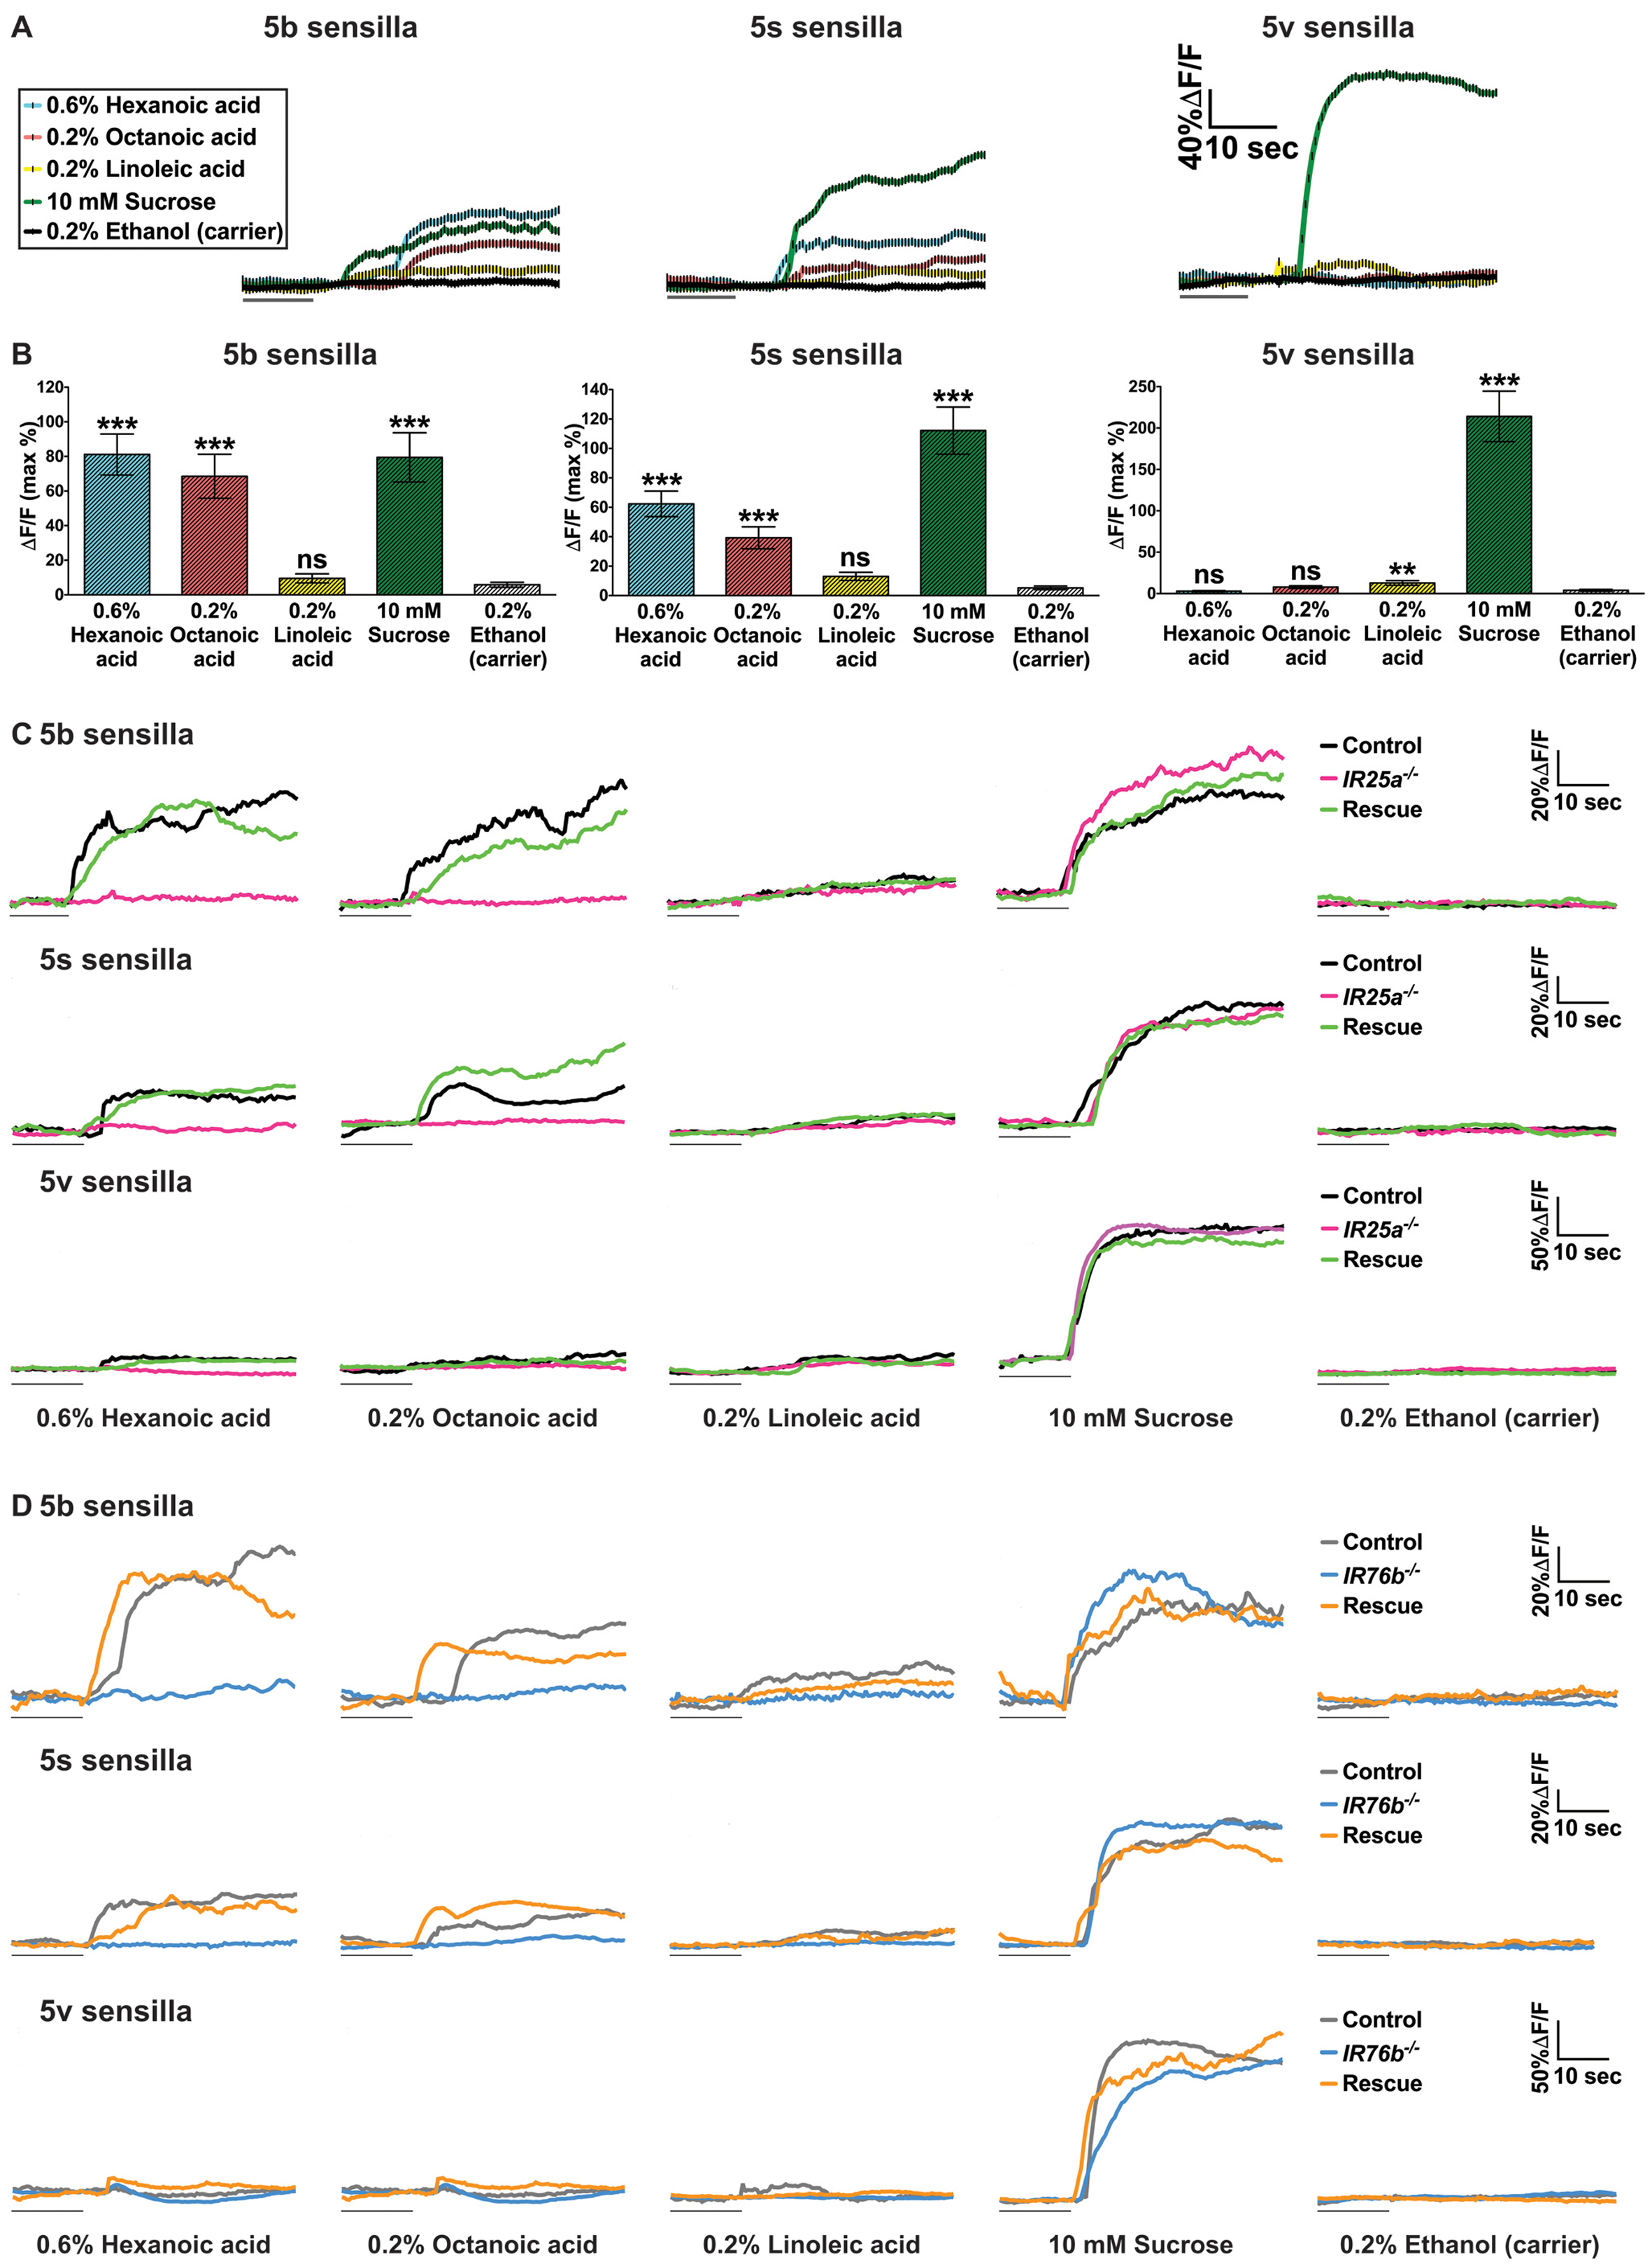

Supplement: supp [file elife-30115-supp-v1.zip › elife_poa_e30115_Figure_4_figure_supplement_1.tif]

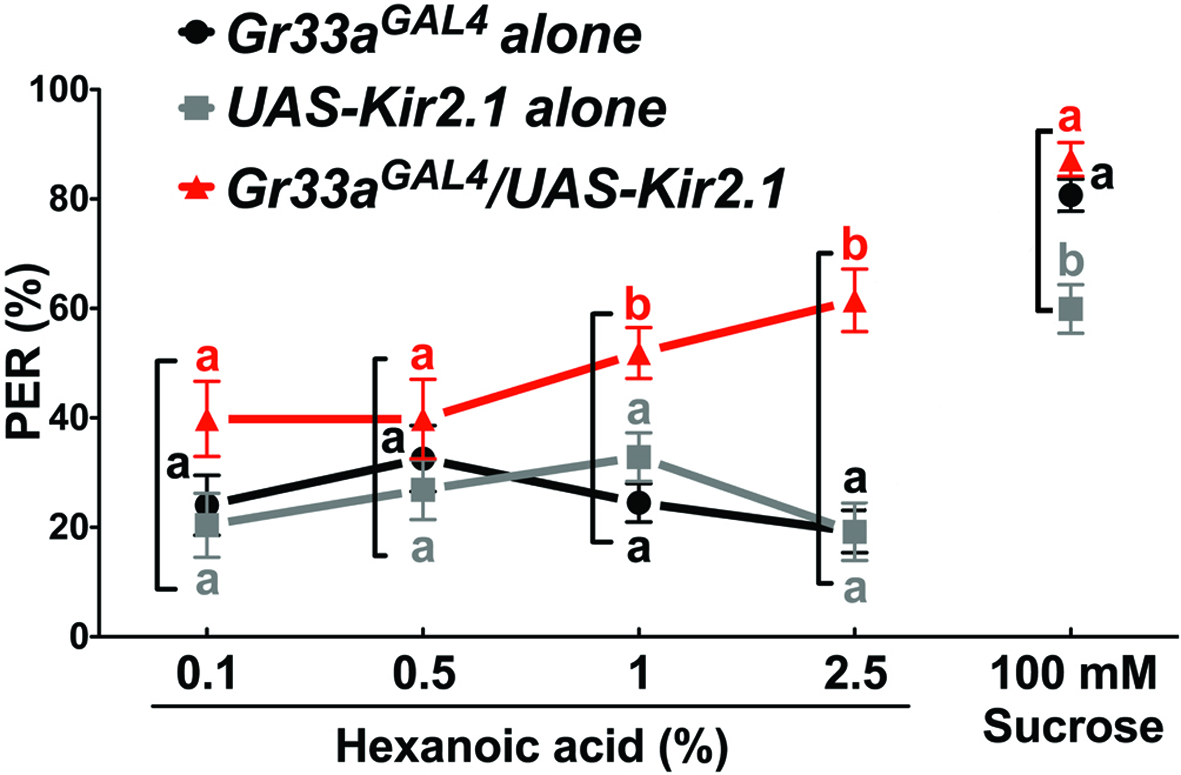

Supplement: supp [file elife-30115-supp-v1.zip › elife_poa_e30115_Figure_7_figure_supplement_2.tif]

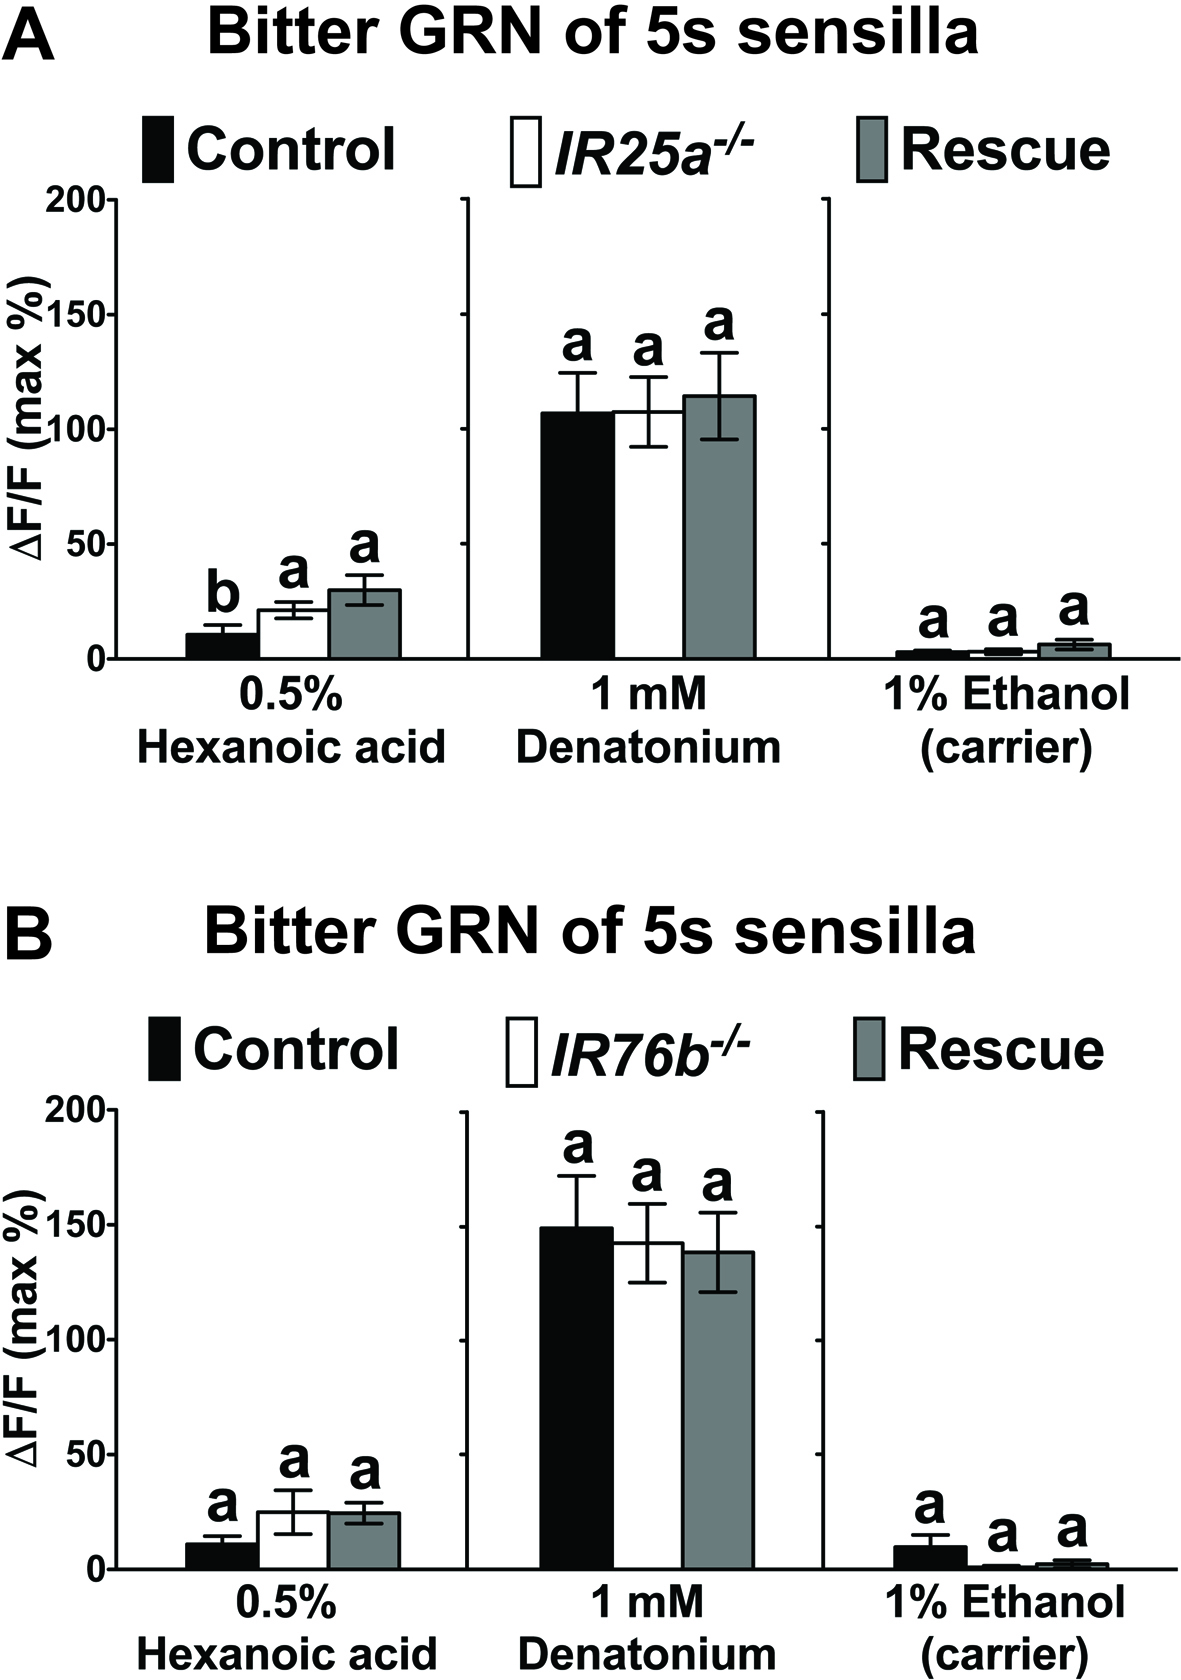

Supplement: supp [file elife-30115-supp-v1.zip › elife_poa_e30115_Figure_6_figure_supplement_1.tif]

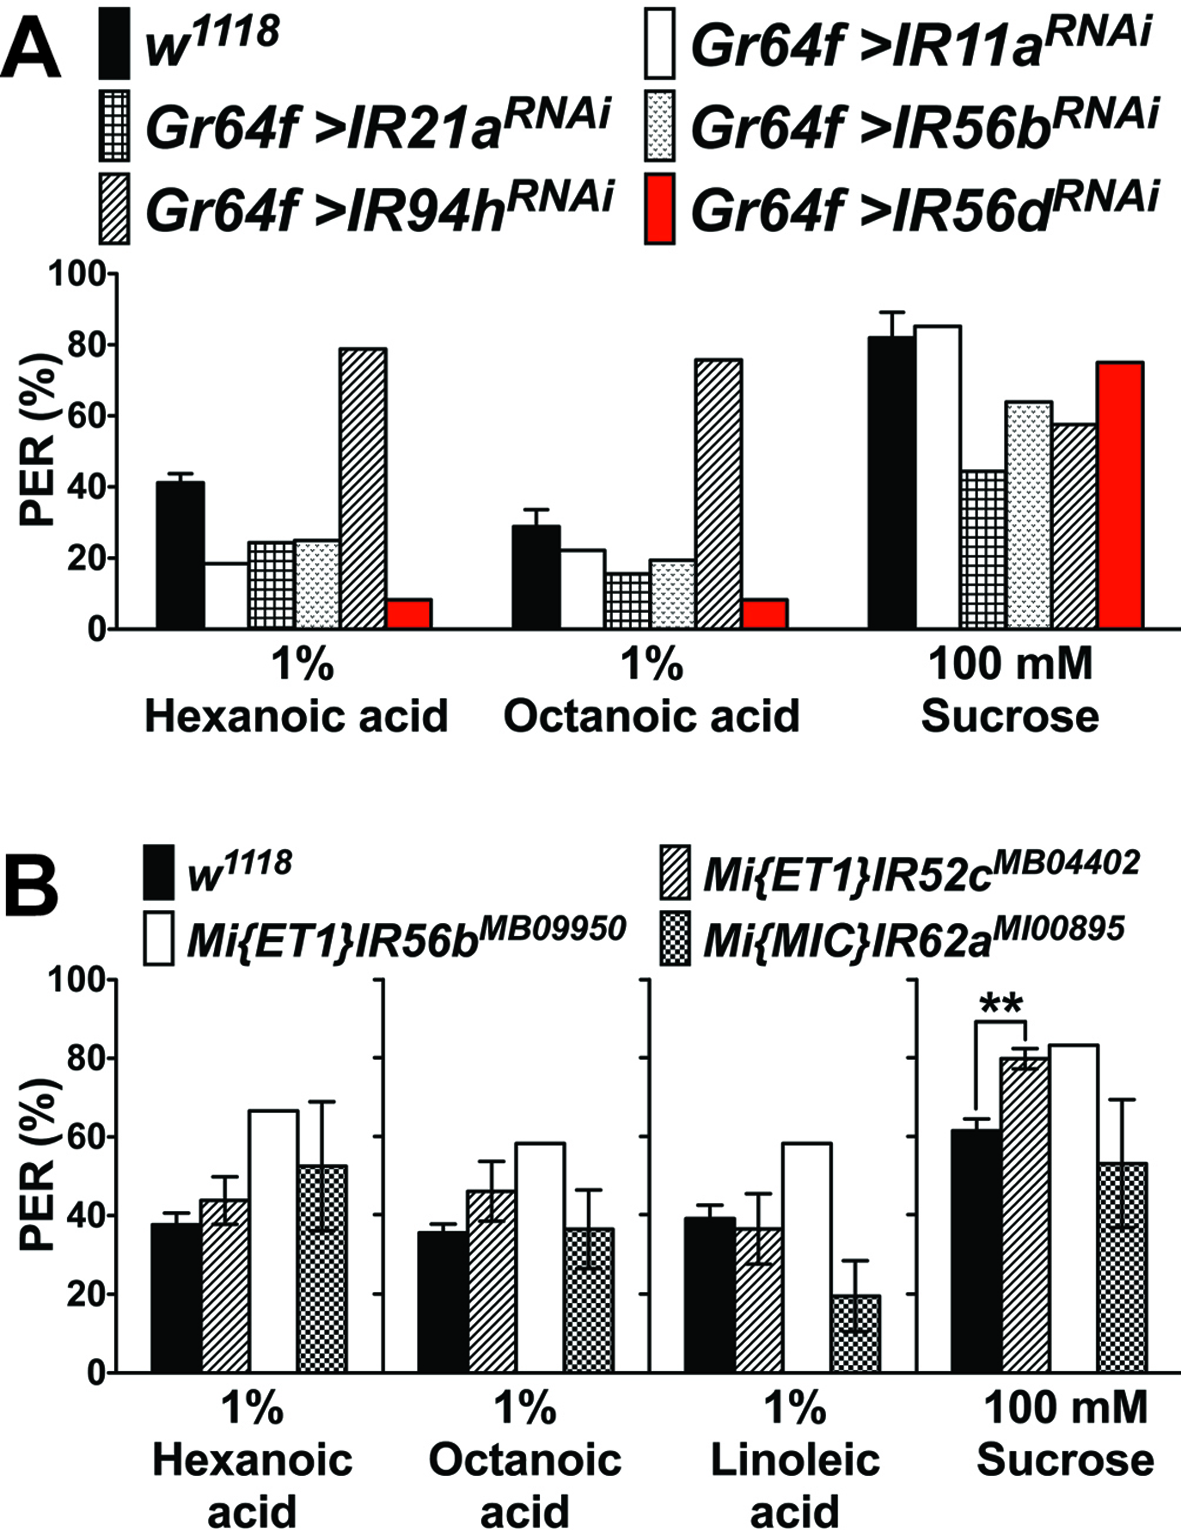

Supplement: supp [file elife-30115-supp-v1.zip › elife_poa_e30115_Figure_5_figure_supplement_1.tif]

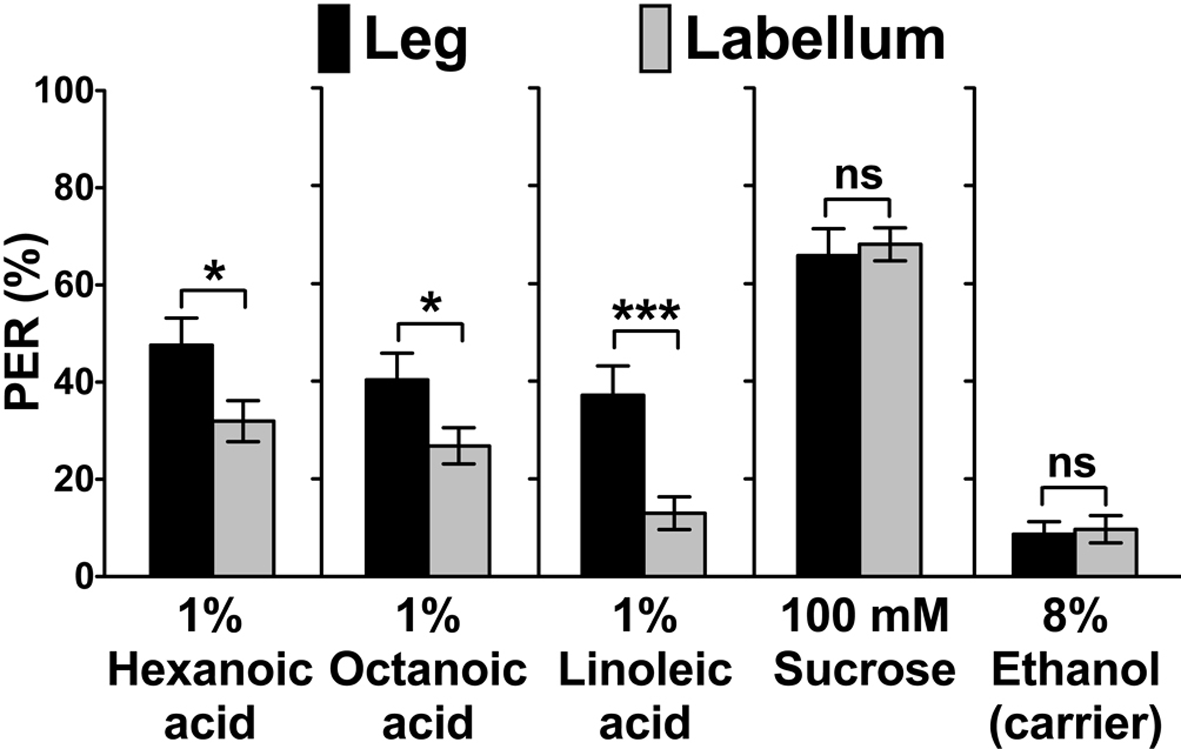

Supplement: supp [file elife-30115-supp-v1.zip › elife_poa_e30115_Figure_1_figure_supplement_1.tif]

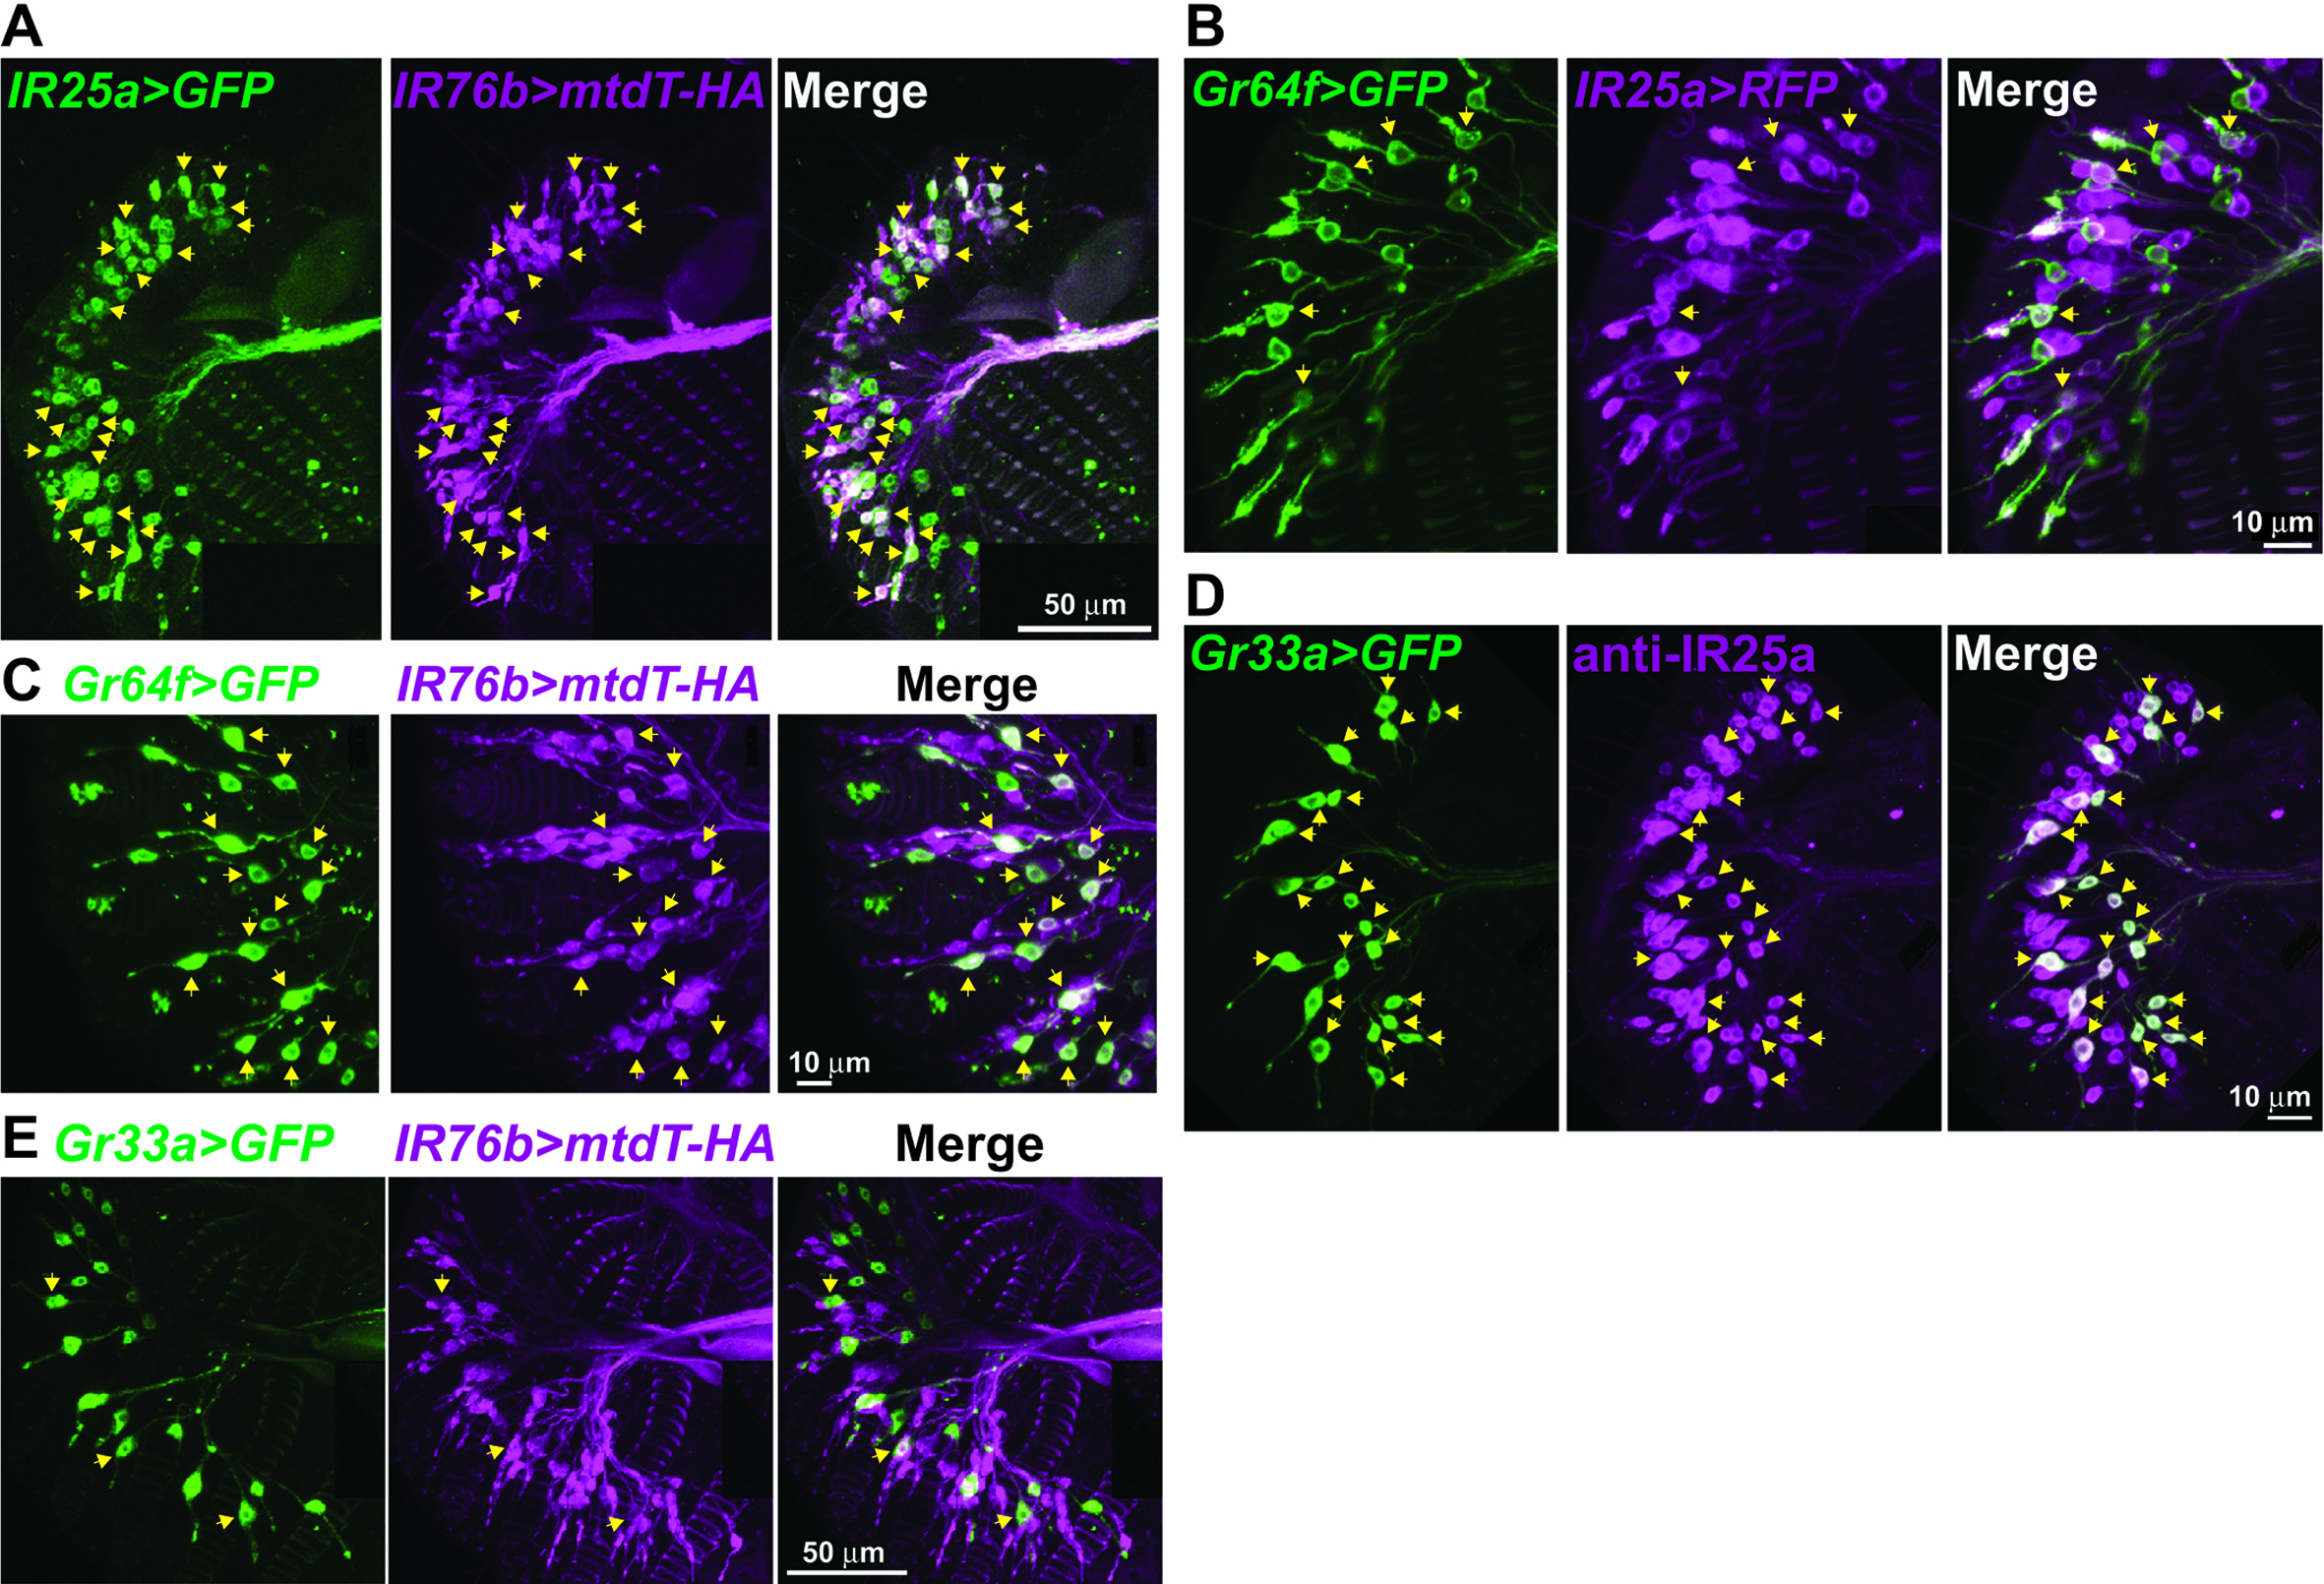

Supplement: supp [file elife-30115-supp-v1.zip › elife_poa_e30115_Figure_2_figure_supplement_1.tif]
